# Supplementary material for: Factors associated with psychosocial problems in Korean nursing and non-nursing students during the COVID-19 pandemic
Source: PeerJ. 2021 Dec 7;9:e12541. doi: 10.7717/peerj.12541 (PMC8663619; doi:10.7717/peerj.12541)
Supplement: Supplemental Information 1 [file peerj-09-12541-s001.xlsx]

## Sheet: rawdata
타임스탬프	1. 귀하의 성별은 무엇입니까?	2. 귀하의 연령은 무엇입니까?	3. 귀하의 학년은 무엇입니까?	4. 귀하의 소속 학과 계열은 무엇입니까?	5. 귀하의 종교는 무엇입니까?	1. 귀하는 흡연을 하십니까?	2. 귀하의 일주일 음주량은 어떻게 되십니까?	3. 귀하는 만성질환을 가지고 있습니까?	3-1. 귀하가 가지고 계신 만성질환의 종류는 무엇입니까?	4. 귀하는 호흡기 질환을 가지고 있습니까?	4-1. 귀하가 가지고 계신 호흡기 질환의 종류는 무엇입니까?	5. 최근 1년 이내에 의료기관에서 예방접종을 하신 적이 있으십니까?	5-1. 최근 1년 이내에 의료기관에서 받은 예방접종의 종류는 무엇입니까?	6. 최근 3개월 이내에 의료기관을 이용하신 적이 있으십니까?	6-1. 최근 3개월 이내에 의료기관을 이용하신 목적은 무엇입니까?	1. 코로나바이러스감염증-19에 감염될까봐	2. 코로나바이러스감염증-19에 감염되면 질병이 중해져서 사망할까봐	3. 소아나 고령, 지병이 있는 가족이 코로나바이러스감염증-19에 감염될까봐	4. 전국적으로 코로나바이러스감염증-19가 유행하여 사회경제적 혼란이 올까봐	5. 전반적으로 코로나바이러스감염증-19 때문에	1. 비누나 세정제로 자주 손씻기	2. 씻지 않은 손으로 눈, 코, 입을 만지지 말기	3. 재채기나 기침시 휴지나 손수건으로 가리기	4. 발열, 호흡기 증상이 있는 타인과의 접촉을 피하기	5. 외출 시 마스크 착용하기	6. 사람들이 많이 모이는 장소를 피하기	7. 병문안 및 의료기관 방문을 자제하기	1. 식사하기 전 얼마나 자주 손을 씻었습니까?	2. 화장실 다녀온 후 얼마나 자주 손을 씻었습니까?	3. 외출 후 집에 돌아왔을 때 얼마나 자주 손을 씻었습니까?	4. 비누나 손 세정제를 얼마나 자주 사용하였습니까?	1. 정부의 코로나바이러스감염증-19 예방 지침과 홍보는 어떠하였습니까?	2. 대중매체를 통한 코로나바이러스감염증-19 발생 정보 전달은 어떠하였습니까?	3. 국내 의료기관의 코로나바이러스감염증-19 감염 대응 능력은 어떠하였습니까?	4. 코로나바이러스감염증-19 확산 방지 대책(격리조치 등)은 어떠하였습니까?	5. 전반적인 코로나바이러스감염증-19 유행에 대한 정부의 대응은 어떠하였습니까?	6. 코로나바이러스감염증-19 유행 기간 중 스트레스 인지	7. 코로나바이러스감염증-19 유행 기간 중 주관적건강수준	8. 코로나바이러스감염증-19 감염으로 인한 격리 및 능동감시경험 여부	9. 호흡기증상 경험 여부	1.현재 매우 편안하며 건강하다고 느낀다.	2.잠자고 난 후에도 개운한 감이 없다.	3.매우 피곤하고 지쳐 있어 먹는 것조차도 힘들다고 느껴진다.	4.근심 걱정 때문에 편안하게 잠을 자지 못한다.	5.정신이 맑고 깨끗하다고 느낀다.	6.기력(원기)이 왕성함을 느낀다.	7.밤이면 심란해지거나 불안해진다.	8.대다수의 사람들과 마찬가지로 나 자신을 잘 관리하고 있다고 생각한다.	9.전체적으로 현재 내가 하고 있는 일은 잘 되어가고 있다고 느낀다.
timestamp	gender	age	grade	major	Religion	Smoking	Drinking	Chronic disease	Chronic disease name	Respiratory disease	Respiratory disease name	Vaccination within 12 months		Hospital visits within three months		Sensitivity to COVID-19 infection 1	Sensitivity to COVID-19 infection 2	Sensitivity to COVID-19 infection 3	Sensitivity to COVID-19 infection 4	Sensitivity to COVID-19 infection 5	Attitude toward preventive behaviors 1	Attitude toward preventive behaviors 2	Attitude toward preventive behaviors 3	Attitude toward preventive behaviors 4	Attitude toward preventive behaviors 5	Attitude toward preventive behaviors 6	Attitude toward preventive behaviors 7	Handwashing compliance 1	Handwashing compliance 2	Handwashing compliance 3	Handwashing compliance 4	Trust in policy 1	Trust in policy 2	Trust in policy 3	Trust in policy 4	Trust in policy 5	perceived stress	PHS during COVID-19	Stayed at home for COVID-19	Respiratory symptoms	Psychosocial problems 1	Psychosocial problems 2	Psychosocial problems 3	Psychosocial problems 4	Psychosocial problems 5	Psychosocial problems 6	Psychosocial problems 7	Psychosocial problems 8	Psychosocial problems 9
2020-08-09 02:27:47	여	23	3학년	인물/예술계열	무교	예	마시지 않는다	아니오(4번 문항으로)		아니오(5번 문항으로)		예(5-1번 문항으로)	독감, 폐렴구균	예(6-1번 문항으로)	예방접종	3	1	5	4	3	5	5	5	5	5	4	4	항상함	항상함	항상함	항상함	5	5	5	5	5	5	양호	해당사항 없음	없음	2	1	3	2	3	3	1	2	2
2020-08-10 02:35:42	여	22	2학년	인물/예술계열	무교	예	마시지 않는다	아니오(4번 문항으로)		아니오(5번 문항으로)		예(5-1번 문항으로)	독감, 폐렴구균	예(6-1번 문항으로)	예방접종	3	1	5	4	3	5	5	5	5	5	4	4	항상함	항상함	항상함	항상함	5	5	5	5	5	5	양호	해당사항 없음	없음	2	1	3	2	3	3	1	2	2
2020-08-13 10:10:01	여	19	4학년	인물/예술계열	무교	아니오	주 1-2회	아니오(4번 문항으로)		예(4-1번 문항으로)	비염	아니오(6번 문항으로)		예(6-1번 문항으로)	항체주사 맞기 위함	5	3	4	5	5	4	2	5	5	5	4	3	가끔함	항상함	항상함	항상함	4	3	5	2	3	4	보통	해당사항 없음	없음	2	2	3	3	2	2	1	0	2
2020-08-13 10:11:36	여	21	2학년	인물/예술계열	무교	아니오	마시지 않는다	아니오(4번 문항으로)		아니오(5번 문항으로)		아니오(6번 문항으로)		아니오(7번 문항으로)		3	5	5	5	5	5	3	3	4	5	4	3	항상함	항상함	항상함	항상함	3	4	4	4	3	4	양호	해당사항 없음	없음	0	3	3	3	0	0	3	0	1
2020-08-13 10:15:30	여	23	3학년	인물/예술계열	기독교	아니오	마시지 않는다	아니오(4번 문항으로)		예(4-1번 문항으로)	(만성)기관지염	아니오(6번 문항으로)		예(6-1번 문항으로)	건강검진	5	2	5	4	5	5	5	5	4	5	5	5	항상함	항상함	항상함	항상함	4	4	5	4	5	3	보통	해당사항 없음	없음	3	3	3	3	1	2	2	3	2
2020-08-13 10:16:02	여	23	1학년	인물/예술계열	천주교	예	주 1-2회	예(3-1번 문항으로)	비염	아니오(5번 문항으로)		아니오(6번 문항으로)		예(6-1번 문항으로)	치과	3	2	4	3	4	5	3	5	5	5	4	4	항상함	항상함	항상함	항상함	3	3	3	3	3	5	보통	해당사항 없음	증상경험 있음	1	2	3	2	2	2	2	1	2
2020-08-13 10:18:21	여	23	4학년	인물/예술계열	천주교	예	주 1-2회	예(3-1번 문항으로)	비염	아니오(5번 문항으로)		아니오(6번 문항으로)		예(6-1번 문항으로)	치과	3	2	4	3	4	5	3	5	5	5	4	4	항상함	항상함	항상함	항상함	3	3	3	3	3	5	보통	해당사항 없음	증상경험 있음	1	2	3	2	2	2	2	1	2
2020-08-13 10:24:42	여	28	1학년	인물/예술계열	무교	아니오	주 1-2회	아니오(4번 문항으로)		아니오(5번 문항으로)		아니오(6번 문항으로)		아니오(7번 문항으로)		5	5	5	5	5	5	5	5	5	5	4	5	항상함	항상함	항상함	항상함	3	3	1	1	1	5	양호	해당사항 없음	없음	0	3	3	3	0	0	3	0	0
2020-07-13 10:42:19	여	19	3학년	인물/예술계열	불교	아니오	마시지 않는다	예(3-1번 문항으로)	저혈압	아니오(5번 문항으로)		아니오(6번 문항으로)		예(6-1번 문항으로)	기저질환치료	3	3	5	4	4	5	5	5	5	5	5	3	항상함	항상함	항상함	항상함	4	4	5	2	1	4	보통	해당사항 없음	없음	1	1	2	1	2	2	1	1	2
2020-07-13 10:42:38	여	20	2학년	인물/예술계열	무교	아니오	주 1-2회	아니오(4번 문항으로)		아니오(5번 문항으로)		아니오(6번 문항으로)		아니오(7번 문항으로)		3	4	4	4	3	5	5	5	2	5	3	4	항상함	항상함	항상함	가끔함	4	4	5	3	2	4	양호	해당사항 없음	없음	1	3	3	1	2	1	0	1	3
2020-07-13 10:43:23	여	21	4학년	인물/예술계열	무교	아니오	마시지 않는다	아니오(4번 문항으로)		아니오(5번 문항으로)		아니오(6번 문항으로)		아니오(7번 문항으로)		5	4	4	4	4	4	4	4	5	5	4	3	항상함	항상함	항상함	항상함	4	4	4	4	4	4	양호하지 않음	해당사항 없음	증상경험 있음	2	1	2	0	3	2	1	2	1
2020-07-13 11:05:08	남	25	4학년	인물/예술계열	무교	아니오	주 1-2회	아니오(4번 문항으로)		아니오(5번 문항으로)		아니오(6번 문항으로)		아니오(7번 문항으로)		4	1	5	4	4	5	4	3	5	5	3	4	항상함	항상함	항상함	항상함	5	5	5	5	5	4	양호	해당사항 없음	없음	2	1	3	3	2	3	3	2	1
2020-07-13 11:11:14	여	21	2학년	인물/예술계열	기독교	예	주 3-4회	아니오(4번 문항으로)		아니오(5번 문항으로)		예(5-1번 문항으로)	인플루엔자	예(6-1번 문항으로)	감기	4	5	5	3	4	5	4	5	5	5	5	4	가끔함	항상함	항상함	항상함	4	5	5	5	4	5	양호	해당사항 없음	없음	2	2	3	3	2	3	3	1	2
2020-07-13 11:21:25	여	20	4학년	인물/예술계열	천주교	예	주 1-2회	예(3-1번 문항으로)	비염	아니오(5번 문항으로)		아니오(6번 문항으로)		예(6-1번 문항으로)	치과	3	2	4	3	4	5	3	5	5	5	4	4	항상함	항상함	항상함	항상함	3	3	3	3	3	5	보통	해당사항 없음	증상경험 있음	1	2	3	2	2	2	2	1	2
2020-07-13 11:24:45	여	23	1학년	자연과학계열	무교	아니오	마시지 않는다	아니오(4번 문항으로)		아니오(5번 문항으로)		아니오(6번 문항으로)		예(6-1번 문항으로)	장염	3	1	1	4	4	2	2	5	5	4	2	5	항상함	항상함	가끔함	가끔함	4	4	5	5	5	4	보통	해당사항 없음	없음	0	3	3	1	2	2	1	2	2
2020-07-13 11:25:40	여	20	3학년	자연과학계열	기독교	아니오	마시지 않는다	예(3-1번 문항으로)	빈혈, 비염	예(4-1번 문항으로)	만성비염	아니오(6번 문항으로)		예(6-1번 문항으로)	기저질환치료	4	5	4	5	5	5	5	3	4	5	4	4	항상함	항상함	항상함	항상함	5	5	5	5	5	5	양호	해당사항 없음	없음	1	2	3	3	2	2	3	1	2
2020-07-13 11:40:29	여	23	4학년	전자제어공학	무교	아니오	주 1-2회	아니오(4번 문항으로)		아니오(5번 문항으로)		아니오(6번 문항으로)		아니오(7번 문항으로)		4	2	5	4	4	3	3	4	5	5	2	4	항상함	항상함	가끔함	가끔함	4	5	5	5	5	5	보통	해당사항 없음	없음	1	1	1	1	2	2	1	3	2
2020-07-13 12:10:42	여	19	4학년	전자제어공학	무교	아니오	주 1-2회	아니오(4번 문항으로)		아니오(5번 문항으로)		아니오(6번 문항으로)		아니오(7번 문항으로)		4	2	5	4	4	3	3	4	5	5	2	4	항상함	항상함	가끔함	가끔함	4	5	5	5	5	5	보통	해당사항 없음	없음	1	1	1	1	2	2	1	3	2
2020-07-13 12:11:10	여	20	3학년	직장인	무교	예	마시지 않는다	아니오(4번 문항으로)		아니오(5번 문항으로)		예(5-1번 문항으로)	A형간염/B형간염	아니오(7번 문항으로)		3	3	4	5	4	3	4	3	5	5	5	4	항상함	항상함	항상함	항상함	5	5	5	5	5	5	양호	해당사항 없음	없음	3	3	3	2	2	2	3	3	3
2020-07-13 12:13:23	여	19	1학년	체육학과	무교	아니오	주 1-2회	아니오(4번 문항으로)		예(4-1번 문항으로)	천식	아니오(6번 문항으로)		아니오(7번 문항으로)		5	2	5	5	3	5	5	5	5	5	2	5	항상함	항상함	항상함	항상함	5	5	5	5	5	5	양호	해당사항 없음	없음	1	2	3	3	3	1	3	1	1
2020-07-13 12:14:42	여	19	4학년	사회과학계열	무교	아니오	마시지 않는다	아니오(4번 문항으로)		아니오(5번 문항으로)		예(5-1번 문항으로)	인플루엔자	아니오(7번 문항으로)		4	1	5	4	3	5	1	4	4	5	2	5	거의안함	항상함	항상함	거의안함	3	1	3	5	4	5	보통	격리 및 감시대상	없음	0	3	3	3	0	1	1	1	1
2020-07-13 12:15:39	여	21	2학년	사회과학계열	무교	아니오	주 1-2회	아니오(4번 문항으로)		아니오(5번 문항으로)		아니오(6번 문항으로)		예(6-1번 문항으로)	보건증 발급	5	5	5	5	5	5	4	5	5	5	4	5	가끔함	항상함	항상함	가끔함	5	5	5	5	5	4	양호	해당사항 없음	없음	3	3	3	3	0	1	1	1	1
2020-07-13 12:18:45	남	23	1학년	사회과학계열	기독교	예	주 1-2회	아니오(4번 문항으로)		아니오(5번 문항으로)		아니오(6번 문항으로)		예(6-1번 문항으로)	감기	5	5	5	5	5	5	4	5	5	5	5	5	항상함	항상함	항상함	항상함	5	5	4	5	4	5	보통	해당사항 없음	없음	1	1	1	2	2	3	2	1	2
2020-07-13 12:21:29	여	20	3학년	사회과학계열	무교	예	주 1-2회	아니오(4번 문항으로)		아니오(5번 문항으로)		아니오(6번 문항으로)		예(6-1번 문항으로)	산부인과	2	4	4	4	4	4	5	5	5	5	3	3	항상함	항상함	항상함	항상함	3	4	4	4	4	4	양호	해당사항 없음	없음	1	3	3	3	0	0	3	1	1
2020-07-13 12:22:22	여	20	4학년	사회과학계열	무교	아니오	주 3-4회	아니오(4번 문항으로)		아니오(5번 문항으로)		아니오(6번 문항으로)		아니오(7번 문항으로)		4	2	5	4	4	4	3	5	5	5	4	5	가끔함	항상함	가끔함	항상함	5	5	5	5	5	4	양호	해당사항 없음	없음	1	2	3	3	1	1	3	2	1
2020-07-13 12:30:31	여	18	2학년	사회과학계열	기독교	예	주 3-4회	아니오(4번 문항으로)		아니오(5번 문항으로)		아니오(6번 문항으로)		아니오(7번 문항으로)		5	2	4	5	5	5	4	5	5	5	2	4	항상함	항상함	항상함	가끔함	5	5	5	5	2	5	양호	해당사항 없음	없음	3	3	3	3	0	0	3	0	2
2020-07-13 12:43:30	여	19	4학년	사회과학계열	무교	예	주 3-4회	아니오(4번 문항으로)		예(4-1번 문항으로)	천식	아니오(6번 문항으로)		아니오(7번 문항으로)		4	4	4	5	4	5	3	5	4	3	5	3	항상함	항상함	항상함	항상함	1	1	1	1	3	4	양호	해당사항 없음	없음	0	3	3	3	0	0	3	0	0
2020-07-13 12:54:15	여	21	2학년	사회과학계열	무교	예	주 3-4회	아니오(4번 문항으로)		아니오(5번 문항으로)		아니오(6번 문항으로)		아니오(7번 문항으로)		3	3	3	3	3	4	4	4	4	5	4	5	항상함	항상함	항상함	항상함	3	3	4	4	4	5	양호	격리 및 감시대상	없음	0	1	3	1	1	1	2	1	1
2020-07-13 13:11:14	여	19	2학년	사회과학계열	무교	아니오	마시지 않는다	아니오(4번 문항으로)		아니오(5번 문항으로)		예(5-1번 문항으로)	인플루엔자	예(6-1번 문항으로)	예방접종	4	2	5	3	4	5	4	4	5	5	4	4	항상함	항상함	항상함	항상함	4	4	5	5	4	4	양호	해당사항 없음	없음	2	3	3	3	2	2	3	1	1
2020-07-13 13:12:43	여	18	3학년	사회과학계열	기독교	아니오	마시지 않는다	아니오(4번 문항으로)		아니오(5번 문항으로)		아니오(6번 문항으로)		예(6-1번 문항으로)	심혈관질환검사및치료	4	4	4	5	5	4	4	4	4	5	3	4	항상함	항상함	항상함	가끔함	4	2	4	4	4	5	양호하지 않음	해당사항 없음	없음	3	0	2	1	2	3	0	3	2
2020-07-13 13:17:35	여	22	3학년	사회과학계열	무교	아니오	주 1-2회	아니오(4번 문항으로)		아니오(5번 문항으로)		아니오(6번 문항으로)		아니오(7번 문항으로)		4	4	4	4	4	4	4	4	4	5	4	4	가끔함	항상함	항상함	가끔함	4	4	4	4	4	4	양호	해당사항 없음	없음	1	2	3	3	1	1	3	1	1
2020-07-13 13:31:03	여	19	4학년	사회과학계열	무교	아니오	마시지 않는다	아니오(4번 문항으로)		아니오(5번 문항으로)		예(5-1번 문항으로)	인플루엔자	예(6-1번 문항으로)	예방접종	2	2	4	3	2	4	3	4	4	5	3	4	항상함	항상함	항상함	항상함	4	4	5	5	5	4	양호	해당사항 없음	없음	0	2	3	3	1	1	3	0	1
2020-07-13 13:32:58	여	22	3학년	사회과학계열	무교	아니오	주 1-2회	아니오(4번 문항으로)		아니오(5번 문항으로)		아니오(6번 문항으로)		예(6-1번 문항으로)	피부과	4	4	5	3	3	4	4	4	4	5	4	4	항상함	항상함	항상함	항상함	4	4	4	3	3	2	보통	해당사항 없음	증상경험 있음	1	2	2	2	1	1	2	1	1
2020-07-13 13:51:10	여	19	3학년	사회과학계열	무교	아니오	마시지 않는다	아니오(4번 문항으로)		아니오(5번 문항으로)		예(5-1번 문항으로)	자궁경부암	아니오(7번 문항으로)		4	4	4	5	4	5	3	3	4	5	4	4	항상함	항상함	항상함	항상함	4	4	4	4	3	5	양호	해당사항 없음	없음	0	1	2	1	1	1	1	0	1
2020-07-13 14:03:05	여	19	2학년	사회과학계열	무교	아니오	주 1-2회	아니오(4번 문항으로)		아니오(5번 문항으로)		예(5-1번 문항으로)	인플루엔자	예(6-1번 문항으로)	눈 염증	4	2	5	4	4	4	3	4	5	5	5	4	가끔함	항상함	항상함	항상함	3	5	4	5	3	4	양호	해당사항 없음	없음	1	3	3	3	1	1	3	1	1
2020-07-13 14:10:57	남	20	1학년	사회과학계열	무교	아니오	주 1-2회	아니오(4번 문항으로)		아니오(5번 문항으로)		아니오(6번 문항으로)		아니오(7번 문항으로)		4	5	4	4	4	2	2	3	5	5	4	5	가끔함	가끔함	거의안함	가끔함	4	4	4	3	3	4	보통	해당사항 없음	없음	3	0	3	1	3	2	3	2	1
2020-07-13 14:26:58	남	20	2학년	사회과학계열	무교	아니오	마시지 않는다	아니오(4번 문항으로)		아니오(5번 문항으로)		아니오(6번 문항으로)		아니오(7번 문항으로)		5	3	3	3	5	5	4	5	5	5	5	5	항상함	항상함	항상함	항상함	3	2	2	3	3	3	양호	해당사항 없음	없음	0	3	3	3	0	0	3	2	0
2020-07-13 14:55:55	여	22	4학년	사회과학계열	천주교	아니오	주 1-2회	아니오(4번 문항으로)		아니오(5번 문항으로)		예(5-1번 문항으로)	인플루엔자	예(6-1번 문항으로)	임파선 부음	3	3	4	3	4	4	4	4	5	5	4	4	항상함	항상함	항상함	항상함	3	3	3	3	3	3	양호	해당사항 없음	없음	1	1	2	2	1	1	2	1	1
2020-07-13 15:21:25	여	18	3학년	사회과학계열	기독교	아니오	마시지 않는다	아니오(4번 문항으로)		아니오(5번 문항으로)		예(5-1번 문항으로)	인플루엔자	아니오(7번 문항으로)		4	4	5	5	4	4	3	4	5	5	5	5	항상함	항상함	항상함	항상함	5	4	5	5	5	4	양호	해당사항 없음	없음	2	1	2	1	2	2	1	1	0
2020-07-13 16:03:46	여	19	2학년	사회과학계열	무교	예	마시지 않는다	아니오(4번 문항으로)		아니오(5번 문항으로)		아니오(6번 문항으로)		예(6-1번 문항으로)	발목염좌	4	3	5	3	4	5	3	4	5	5	3	5	가끔함	항상함	항상함	항상함	5	5	4	2	1	5	양호	해당사항 없음	없음	0	0	3	1	3	1	3	0	1
2020-07-13 16:10:13	여	19	3학년	사회과학계열	무교	아니오	마시지 않는다	아니오(4번 문항으로)		아니오(5번 문항으로)		아니오(6번 문항으로)		예(6-1번 문항으로)	장염 위경련	4	3	4	5	5	4	4	4	5	5	3	3	항상함	항상함	항상함	항상함	3	3	5	3	3	3	보통	해당사항 없음	없음	1	1	2	2	2	2	2	1	2
2020-07-13 16:13:10	남	20	4학년	사회과학계열	무교	아니오	주 1-2회	아니오(4번 문항으로)		아니오(5번 문항으로)		아니오(6번 문항으로)		아니오(7번 문항으로)		5	4	5	4	4	5	5	5	5	5	4	5	항상함	항상함	항상함	항상함	4	5	5	5	3	5	양호	해당사항 없음	없음	0	3	3	3	1	0	3	0	0
2020-07-13 17:00:42	여	21	4학년	사회과학계열	기독교	예	마시지 않는다	아니오(4번 문항으로)		아니오(5번 문항으로)		예(5-1번 문항으로)	파상풍-디프테리아	예(6-1번 문항으로)	상처봉합	3	1	1	3	1	5	5	5	5	5	5	5	항상함	항상함	항상함	항상함	3	5	5	5	2	5	양호	해당사항 없음	없음	3	1	3	3	2	3	3	1	2
2020-07-13 17:12:17	남	24	2학년	사회과학계열	무교	아니오	마시지 않는다	아니오(4번 문항으로)		아니오(5번 문항으로)		예(5-1번 문항으로)	독감	예(6-1번 문항으로)	예방접종	5	2	3	4	4	4	5	5	5	5	5	4	가끔함	항상함	항상함	항상함	3	3	3	3	3	4	보통	해당사항 없음	없음	1	2	2	2	2	1	3	2	1
2020-07-13 17:14:32	여	20	2학년	사회과학계열	기독교	예	마시지 않는다	아니오(4번 문항으로)		아니오(5번 문항으로)		예(5-1번 문항으로)	A형간염/B형간염	아니오(7번 문항으로)		1	1	1	1	3	5	5	5	4	5	2	5	항상함	항상함	항상함	항상함	4	4	4	4	4	5	양호	해당사항 없음	없음	0	3	3	3	0	0	3	0	0
2020-07-13 17:14:40	여	20	4학년	사회과학계열	기독교	아니오	주 1-2회	아니오(4번 문항으로)		아니오(5번 문항으로)		예(5-1번 문항으로)	인플루엔자	아니오(7번 문항으로)		4	3	5	4	4	4	4	5	3	5	4	5	항상함	항상함	항상함	항상함	3	3	4	4	2	5	보통	해당사항 없음	증상경험 있음	1	2	3	2	2	2	1	2	2
2020-07-13 17:14:41	여	21	4학년	사회복지학과	무교	아니오	주 1-2회	아니오(4번 문항으로)		예(4-1번 문항으로)	비염, 축농증	아니오(6번 문항으로)		예(6-1번 문항으로)	감기	4	3	5	4	4	4	4	4	3	5	3	4	가끔함	항상함	항상함	항상함	5	2	4	5	5	5	보통	해당사항 없음	증상경험 있음	0	3	3	1	1	2	3	1	2
2020-07-13 17:15:44	여	21	3학년	어문계열	무교	아니오	주 1-2회	아니오(4번 문항으로)		아니오(5번 문항으로)		아니오(6번 문항으로)		아니오(7번 문항으로)		4	3	5	5	4	5	3	5	4	5	4	5	항상함	항상함	항상함	항상함	4	4	4	4	5	4	양호	해당사항 없음	없음	0	2	3	2	1	1	2	1	2
2020-07-13 17:16:16	여	27	4학년	인문사회	무교	아니오	마시지 않는다	아니오(4번 문항으로)		아니오(5번 문항으로)		아니오(6번 문항으로)		아니오(7번 문항으로)		5	5	5	5	4	4	3	5	5	5	5	5	항상함	항상함	항상함	항상함	4	4	5	5	4	5	보통	해당사항 없음	없음	2	0	2	0	2	3	1	2	1
2020-07-13 17:18:14	여	21	4학년	인문학과	무교	아니오	마시지 않는다	아니오(4번 문항으로)		아니오(5번 문항으로)		아니오(6번 문항으로)		아니오(7번 문항으로)		4	4	4	4	4	3	3	3	3	5	5	5	항상함	항상함	항상함	항상함	5	5	5	5	5	4	양호	해당사항 없음	없음	1	1	2	2	2	2	3	2	2
2020-07-13 17:18:28	여	23	2학년	인물/예술계열	무교	아니오	주 1-2회	아니오(4번 문항으로)		아니오(5번 문항으로)		예(5-1번 문항으로)	인플루엔자	예(6-1번 문항으로)	장염	3	2	5	4	4	5	5	5	5	5	2	5	가끔함	항상함	항상함	항상함	2	4	3	2	2	3	양호	해당사항 없음	없음	0	3	3	3	1	1	3	1	2
2020-07-13 17:18:43	여	21	4학년	인물/예술계열	무교	아니오	마시지 않는다	아니오(4번 문항으로)		아니오(5번 문항으로)		예(5-1번 문항으로)		아니오(7번 문항으로)		4	2	5	4	3	4	3	3	4	4	4	4	거의안함	항상함	가끔함	가끔함	3	3	3	3	3	3	양호하지 않음	해당사항 없음	없음	1	2	2	2	1	2	1	2	2
2020-07-13 17:21:47	여	20	2학년	인물/예술계열	무교	예	매일	아니오(4번 문항으로)		아니오(5번 문항으로)		아니오(6번 문항으로)		예(6-1번 문항으로)	기저질환치료	4	1	3	5	5	4	2	4	3	4	4	3	항상함	항상함	항상함	항상함	5	5	5	5	5	5	보통	해당사항 없음	증상경험 있음	2	2	2	2	2	2	2	2	2
2020-07-13 17:21:54	여	21	2학년	인물/예술계열	천주교	아니오	마시지 않는다	아니오(4번 문항으로)		예(4-1번 문항으로)	(만성)기관지염	아니오(6번 문항으로)		예(6-1번 문항으로)	잠복결핵검사	4	5	5	3	4	5	2	5	5	5	3	4	항상함	항상함	항상함	항상함	5	5	5	4	3	5	양호	해당사항 없음	없음	3	1	3	3	3	2	3	3	2
2020-07-13 17:26:58	여	28	4학년	인물/예술계열	기독교	아니오	주 1-2회	아니오(4번 문항으로)		아니오(5번 문항으로)		아니오(6번 문항으로)		예(6-1번 문항으로)	ㅇ	5	5	5	5	5	4	4	4	5	4	4	5	항상함	항상함	항상함	항상함	3	4	5	4	3	5	보통	해당사항 없음	없음	1	1	2	0	3	2	2	2	1
2020-07-13 17:55:03	여	20	4학년	인물/예술계열	기독교	아니오	마시지 않는다	아니오(4번 문항으로)		아니오(5번 문항으로)		아니오(6번 문항으로)		아니오(7번 문항으로)		5	5	5	5	5	5	4	5	5	5	4	5	가끔함	항상함	항상함	항상함	4	4	4	4	4	4	양호	해당사항 없음	없음	1	2	3	1	1	1	2	1	2
2020-07-13 18:15:16	여	21	4학년	인물/예술계열	무교	예	주 1-2회	아니오(4번 문항으로)		아니오(5번 문항으로)		아니오(6번 문항으로)		예(6-1번 문항으로)	부상	3	1	5	5	3	5	3	5	4	5	3	5	항상함	항상함	항상함	항상함	5	5	5	5	5	3	보통	해당사항 없음	없음	2	0	1	2	3	3	3	3	3
2020-07-30 18:39:04	여	19		IT엔지리어링	무교	아니오	주 1-2회	아니오(4번 문항으로)		아니오(5번 문항으로)		아니오(6번 문항으로)		아니오(7번 문항으로)		4	3	4	3	4	4	3	4	4	5	3	4	가끔함	항상함	항상함	가끔함	4	4	4	4	4	5	보통	해당사항 없음	없음	1	2	2	2	2	2	2	1	2
2020-07-30 19:39:03	여	20		IT엔지리어링	기독교	아니오	주 1-2회	아니오(4번 문항으로)		아니오(5번 문항으로)		아니오(6번 문항으로)		예(6-1번 문항으로)		3	3	3	4	4	5	5	5	5	5	3	4	항상함	항상함	항상함	항상함	4	4	5	5	5	4	보통	해당사항 없음	증상경험 있음	1	2	2	2	3	2	1	2	2
2020-07-30 19:58:23	여	24		IT엔지리어링	무교	아니오	마시지 않는다	아니오(4번 문항으로)		아니오(5번 문항으로)		아니오(6번 문항으로)		아니오(7번 문항으로)		3	4	5	3	3	3	5	5	5	5	5	5	항상함	항상함	항상함	항상함	4	4	4	4	1	5	양호	해당사항 없음	없음	0	3	3	3	1	3	3	0	0
2020-07-30 23:19:34	여	21		IT엔지리어링	무교	아니오	주 1-2회	아니오(4번 문항으로)		아니오(5번 문항으로)		아니오(6번 문항으로)		아니오(7번 문항으로)		2	2	4	4	4	5	2	2	3	5	3	4	가끔함	항상함	항상함	항상함	4	4	4	4	4	4	양호	해당사항 없음	없음	2	2	3	3	2	2	2	3	3
2020-07-31 06:46:27	여	25		IT엔지리어링	무교	아니오	마시지 않는다	아니오(4번 문항으로)		예(4-1번 문항으로)	비염	아니오(6번 문항으로)		예(6-1번 문항으로)	감기	4	3	5	4	4	4	3	4	3	5	4	3	항상함	항상함	항상함	항상함	5	5	5	5	5	5	양호하지 않음	해당사항 없음	없음	2	1	3	3	1	1	3	0	2
2020-07-31 06:48:39	여	28		IT엔지리어링	무교	아니오	주 1-2회	아니오(4번 문항으로)		아니오(5번 문항으로)		아니오(6번 문항으로)		아니오(7번 문항으로)		5	3	5	4	4	5	5	5	5	5	5	5	항상함	항상함	항상함	항상함	3	4	3	4	3	2	양호	해당사항 없음	없음	0	3	3	3	0	0	3	0	2
2020-07-31 09:19:40	여	19		IT엔지리어링	무교	아니오	주 1-2회	아니오(4번 문항으로)		아니오(5번 문항으로)		아니오(6번 문항으로)		아니오(7번 문항으로)		4	4	5	4	4	5	2	4	4	4	2	5	항상함	항상함	항상함	항상함	4	5	5	4	4	4	양호	해당사항 없음	없음	1	1	1	1	2	2	2	1	2
2020-07-31 13:39:32	여	20		IT엔지리어링	무교	아니오	마시지 않는다	아니오(4번 문항으로)		아니오(5번 문항으로)		예(5-1번 문항으로)	독감주사	예(6-1번 문항으로)	예방접종	4	4	5	5	5	5	5	5	4	5	5	5	항상함	항상함	항상함	항상함	4	5	3	4	3	5	양호	해당사항 없음	없음	0	1	3	3	2	2	2	1	1
2020-07-31 22:20:53	여	21		IT엔지리어링	무교	아니오	주 1-2회	아니오(4번 문항으로)		아니오(5번 문항으로)		아니오(6번 문항으로)		예(6-1번 문항으로)	사랑니발치	4	4	5	5	4	3	3	4	4	5	4	4	가끔함	항상함	항상함	가끔함	3	3	3	3	3	4	보통	해당사항 없음	없음	1	1	2	2	1	2	2	1	2
2020-08-01 13:18:51	남	26		간호학과	무교	아니오	마시지 않는다	아니오(4번 문항으로)		아니오(5번 문항으로)		예(5-1번 문항으로)	인플루엔자	아니오(7번 문항으로)		5	5	5	5	5	5	5	5	5	5	5	5	가끔함	항상함	항상함	항상함	5	5	5	5	5	1	양호	해당사항 없음	없음	0	3	3	3	0	0	3	0	0
2020-08-01 17:50:41	여	23		간호학과	천주교	예	주 1-2회	아니오(4번 문항으로)		아니오(5번 문항으로)		아니오(6번 문항으로)		아니오(7번 문항으로)		5	3	5	4	5	3	3	5	5	5	2	2	항상함	항상함	항상함	항상함	4	4	5	4	4	4	양호	해당사항 없음	없음	1	2	3	3	1	1	2	1	2
2020-08-02 16:28:34	여	21		간호학과	무교	아니오	마시지 않는다	아니오(4번 문항으로)		아니오(5번 문항으로)		예(5-1번 문항으로)	자궁경부암	아니오(7번 문항으로)		4	2	5	3	4	5	3	5	5	5	4	5	항상함	항상함	항상함	항상함	4	5	5	4	4	4	양호	해당사항 없음	없음	1	3	3	2	1	1	3	1	0
2020-08-02 16:31:11	여	23		간호학과	기독교	아니오	마시지 않는다	아니오(4번 문항으로)		아니오(5번 문항으로)		예(5-1번 문항으로)	A형간염/B형간염	예(6-1번 문항으로)	예방접종	4	2	4	4	4	5	5	5	5	5	5	4	항상함	항상함	항상함	항상함	4	3	4	3	3	4	양호	해당사항 없음	없음	0	1	3	3	1	2	2	1	1
2020-08-02 16:43:12	여	23		간호학과	천주교	아니오	마시지 않는다	아니오(4번 문항으로)		아니오(5번 문항으로)		아니오(6번 문항으로)		아니오(7번 문항으로)		4	2	5	4	4	4	5	5	4	5	4	5	항상함	항상함	항상함	가끔함	3	3	3	4	4	3	양호	해당사항 없음	없음	0	3	3	3	1	1	3	0	1
2020-08-02 16:49:02	여	8		간호학과	무교	아니오	마시지 않는다	아니오(4번 문항으로)		아니오(5번 문항으로)		아니오(6번 문항으로)		예(6-1번 문항으로)	감기	5	5	5	4	5	5	3	4	4	5	3	4	가끔함	항상함	항상함	항상함	4	5	4	3	3	4	보통	해당사항 없음	없음	2	3	3	3	2	2	2	2	2
2020-08-02 17:01:16	여	23		간호학과	무교	아니오	마시지 않는다	아니오(4번 문항으로)		아니오(5번 문항으로)		아니오(6번 문항으로)		아니오(7번 문항으로)		5	5	5	5	5	5	5	5	5	5	5	5	항상함	항상함	항상함	항상함	4	4	5	4	4	4	양호	해당사항 없음	없음	1	2	3	2	1	1	3	1	1
2020-08-02 17:05:05	여	23		간호학과	무교	아니오	주 1-2회	아니오(4번 문항으로)		아니오(5번 문항으로)		예(5-1번 문항으로)	인플루엔자	아니오(7번 문항으로)		4	1	5	5	4	5	4	5	5	5	5	4	항상함	항상함	항상함	항상함	4	5	4	4	4	3	양호	해당사항 없음	없음	1	2	3	3	0	0	3	0	0
2020-08-02 21:17:52	여	27		간호학과	무교	아니오	주 1-2회	아니오(4번 문항으로)		아니오(5번 문항으로)		아니오(6번 문항으로)		아니오(7번 문항으로)		3	3	3	4	4	3	3	4	4	5	3	5	가끔함	항상함	가끔함	항상함	3	4	4	2	2	2	양호	해당사항 없음	없음	0	3	3	3	0	0	2	0	0
2020-08-03 10:49:37	여	23		간호학과	기독교	아니오	마시지 않는다	아니오(4번 문항으로)		아니오(5번 문항으로)		예(5-1번 문항으로)	A형간염/B형간염	아니오(7번 문항으로)		4	4	4	4	4	5	5	5	5	5	4	3	항상함	항상함	항상함	항상함	4	4	4	4	4	4	보통	해당사항 없음	없음	2	2	1	2	1	2	2	1	1
2020-08-19 13:36:21	여성	20-21세	1학년	간호학과	무교	아니오	마시지 않는다	아니오(4번 문항으로)		아니오(5번 문항으로)		예(5-1번 문항으로)	인플루엔자	아니오(7번 문항으로)		5	5	5	5	5	5	5	5	5	5	5	5	가끔함	항상함	항상함	항상함	5	5	5	5	5	1	양호	해당사항 없음	없음	0	3	3	3	0	0	3	0	0
2020-08-19 13:36:23	남성	20-21세	1학년	간호학과	천주교	예	주 1-2회	아니오(4번 문항으로)		아니오(5번 문항으로)		아니오(6번 문항으로)		아니오(7번 문항으로)		5	3	5	4	5	3	3	5	5	5	2	2	항상함	항상함	항상함	항상함	4	4	5	4	4	4	양호	해당사항 없음	없음	1	2	3	3	1	1	2	1	2
2020-08-19 13:37:07	여성	20-21세	1학년	간호학과	무교	아니오	마시지 않는다	아니오(4번 문항으로)		아니오(5번 문항으로)		예(5-1번 문항으로)	자궁경부암	아니오(7번 문항으로)		4	2	5	3	4	5	3	5	5	5	4	5	항상함	항상함	항상함	항상함	4	5	5	4	4	4	양호	해당사항 없음	없음	1	3	3	2	1	1	3	1	0
2020-08-19 13:41:15	여성	20-21세	1학년	간호학과	기독교	아니오	마시지 않는다	아니오(4번 문항으로)		아니오(5번 문항으로)		예(5-1번 문항으로)	A형간염/B형간염	예(6-1번 문항으로)	예방접종	4	2	4	4	4	5	5	5	5	5	5	4	항상함	항상함	항상함	항상함	4	3	4	3	3	4	양호	해당사항 없음	없음	0	1	3	3	1	2	2	1	1
2020-08-19 13:49:04	여성	20-21세	1학년	간호학과	천주교	아니오	마시지 않는다	아니오(4번 문항으로)		아니오(5번 문항으로)		아니오(6번 문항으로)		아니오(7번 문항으로)		4	2	5	4	4	4	5	5	4	5	4	5	항상함	항상함	항상함	가끔함	3	3	3	4	4	3	양호	해당사항 없음	없음	0	3	3	3	1	1	3	0	1
2020-08-19 13:56:35	여성	20-21세	1학년	간호학과	무교	아니오	마시지 않는다	아니오(4번 문항으로)		아니오(5번 문항으로)		아니오(6번 문항으로)		예(6-1번 문항으로)	감기	5	5	5	4	5	5	3	4	4	5	3	4	가끔함	항상함	항상함	항상함	4	5	4	3	3	4	보통	해당사항 없음	없음	2	3	3	3	2	2	2	2	2
2020-08-19 14:03:37	여성	20-21세	1학년	간호학과	무교	아니오	마시지 않는다	아니오(4번 문항으로)		아니오(5번 문항으로)		아니오(6번 문항으로)		아니오(7번 문항으로)		5	5	5	5	5	5	5	5	5	5	5	5	항상함	항상함	항상함	항상함	4	4	5	4	4	4	양호	해당사항 없음	없음	1	2	3	2	1	1	3	1	1
2020-08-19 14:05:27	여성	26-27세	3학년	간호학과	무교	아니오	주 1-2회	아니오(4번 문항으로)		아니오(5번 문항으로)		예(5-1번 문항으로)	인플루엔자	아니오(7번 문항으로)		4	1	5	5	4	5	4	5	5	5	5	4	항상함	항상함	항상함	항상함	4	5	4	4	4	3	양호	해당사항 없음	없음	1	2	3	3	0	0	3	0	0
2020-08-19 14:09:34	여성	20-21세	1학년	간호학과	무교	아니오	주 1-2회	아니오(4번 문항으로)		아니오(5번 문항으로)		아니오(6번 문항으로)		아니오(7번 문항으로)		3	3	3	4	4	3	3	4	4	5	3	5	가끔함	항상함	가끔함	항상함	3	4	4	2	2	2	양호	해당사항 없음	없음	0	3	3	3	0	0	2	0	0
2020-08-19 14:28:02	여성	20-21세	1학년	간호학과	기독교	아니오	마시지 않는다	아니오(4번 문항으로)		아니오(5번 문항으로)		예(5-1번 문항으로)	A형간염/B형간염	아니오(7번 문항으로)		4	4	4	4	4	5	5	5	5	5	4	3	항상함	항상함	항상함	항상함	4	4	4	4	4	4	보통	해당사항 없음	없음	2	2	1	2	1	2	2	1	1
2020-08-19 14:43:46	남성	20-21세	1학년	간호학과	기독교	아니오	마시지 않는다	예(3-1번 문항으로)	부비동염	예(4-1번 문항으로)	축농증	아니오(6번 문항으로)		아니오(7번 문항으로)		5	5	5	5	5	5	5	5	5	5	5	5	항상함	항상함	항상함	항상함	5	5	3	4	2	5	양호	해당사항 없음	없음	1	1	3	3	1	0	3	0	1
2020-08-19 15:03:10	여성	22-23세	4학년	간호학과	무교	아니오	주 1-2회	아니오(4번 문항으로)		아니오(5번 문항으로)		예(5-1번 문항으로)	A형간염/B형간염	아니오(7번 문항으로)		4	4	5	5	5	4	3	5	5	5	5	5	가끔함	항상함	가끔함	가끔함	4	5	5	3	4	4	보통	해당사항 없음	없음	2	3	3	3	1	1	3	1	0
2020-08-19 15:05:11	여성	22-23세	4학년	간호학과	무교	아니오	마시지 않는다	아니오(4번 문항으로)		아니오(5번 문항으로)		예(5-1번 문항으로)	인플루엔자	예(6-1번 문항으로)	감기	5	4	5	5	5	5	5	5	5	5	5	5	항상함	항상함	항상함	항상함	4	4	3	2	3	5	양호	해당사항 없음	없음	2	1	1	2	2	2	3	1	1
2020-08-19 15:05:48	여성	24-25세	4학년	간호학과	기독교	아니오	마시지 않는다	아니오(4번 문항으로)		아니오(5번 문항으로)		예(5-1번 문항으로)	A형간염/B형간염	예(6-1번 문항으로)	코로나바이러스감염증-19 검사	5	4	5	2	4	5	5	4	5	5	5	4	항상함	항상함	항상함	항상함	4	4	4	4	4	3	보통	해당사항 없음	없음	2	2	2	2	2	2	1	3	1
2020-08-19 15:10:43	여성	22-23세	4학년	간호학과	무교	아니오	마시지 않는다	아니오(4번 문항으로)		아니오(5번 문항으로)		예(5-1번 문항으로)	A형간염/B형간염	아니오(7번 문항으로)		5	4	5	5	5	5	3	5	5	5	5	5	항상함	항상함	항상함	항상함	2	4	1	1	1	3	양호	해당사항 없음	없음	0	0	2	1	2	2	3	0	2
2020-08-19 15:23:41	여성	20-21세	2학년	간호학과	기독교	아니오	주 1-2회	아니오(4번 문항으로)		아니오(5번 문항으로)		예(5-1번 문항으로)	인플루엔자	아니오(7번 문항으로)		4	4	4	5	4	4	4	5	5	5	4	5	가끔함	항상함	항상함	항상함	4	4	4	4	4	5	양호	해당사항 없음	없음	0	1	3	1	2	2	2	0	1
2020-08-19 15:49:02	여성	24-25세	4학년	간호학과	불교	아니오	주 1-2회	아니오(4번 문항으로)		아니오(5번 문항으로)		아니오(6번 문항으로)		아니오(7번 문항으로)		3	2	4	5	3	2	2	5	4	5	2	3	가끔함	항상함	항상함	가끔함	2	2	2	2	2	4	양호	해당사항 없음	없음	2	3	3	3	0	1	2	2	2
2020-08-19 18:20:12	여성	20-21세	2학년	간호학과	기독교	아니오	마시지 않는다	아니오(4번 문항으로)		아니오(5번 문항으로)		아니오(6번 문항으로)		예(6-1번 문항으로)	코로나바이러스감염증-19 검사	5	5	5	4	5	5	5	5	5	5	5	5	항상함	항상함	항상함	항상함	2	5	3	2	2	5	양호	해당사항 없음	없음	2	2	3	3	2	3	1	1	1
2020-08-19 20:15:52	남성	22-23세	2학년	공과대학	무교	아니오	주 1-2회	아니오(4번 문항으로)		아니오(5번 문항으로)		예(5-1번 문항으로)	인플루엔자	아니오(7번 문항으로)		4	2	4	5	4	5	2	5	3	5	3	3	가끔함	항상함	항상함	항상함	4	5	4	5	3	5	양호	해당사항 없음	없음	3	1	3	3	1	1	2	1	1
2020-08-19 20:27:27	남성	22-23세	2학년	사회과학계열	무교	아니오	주 1-2회	아니오(4번 문항으로)		아니오(5번 문항으로)		예(5-1번 문항으로)	파상풍-디프테리아	예(6-1번 문항으로)	습진	2	1	4	4	2	4	4	2	5	5	3	4	항상함	항상함	항상함	가끔함	4	4	4	4	4	4	양호	해당사항 없음	없음	1	3	3	3	0	1	3	1	1
2020-08-19 20:29:03	여성	22-23세	4학년	인물/예술계열	무교	아니오	주 1-2회	아니오(4번 문항으로)		아니오(5번 문항으로)		예(5-1번 문항으로)	인플루엔자	예(6-1번 문항으로)	장염	3	2	5	4	4	5	5	5	5	5	2	5	가끔함	항상함	항상함	항상함	2	4	3	2	2	3	양호	해당사항 없음	없음	0	3	3	3	1	1	3	1	2
2020-08-19 20:31:38	남성	22-23세	2학년	IT엔지리어링	무교	아니오	주 1-2회	아니오(4번 문항으로)		아니오(5번 문항으로)		아니오(6번 문항으로)		아니오(7번 문항으로)		4	3	4	3	4	4	3	4	4	5	3	4	가끔함	항상함	항상함	가끔함	4	4	4	4	4	5	보통	해당사항 없음	없음	1	2	2	2	2	2	2	1	2
2020-08-19 20:34:56	여성	22-23세	3학년	간호학과	무교	아니오	마시지 않는다	아니오(4번 문항으로)		아니오(5번 문항으로)		예(5-1번 문항으로)	인플루엔자	예(6-1번 문항으로)	사마귀 치료	4	2	2	2	4	5	4	5	3	5	3	5	항상함	항상함	항상함	항상함	4	4	4	4	4	5	양호	해당사항 없음	없음	1	0	2	2	2	2	2	2	3
2020-08-19 20:45:08	여성	20-21세	1학년	간호학과	무교	아니오	마시지 않는다	아니오(4번 문항으로)		아니오(5번 문항으로)		예(5-1번 문항으로)	독감	예(6-1번 문항으로)	코로나바이러스감염증-19 검사	3	2	3	5	4	5	5	5	5	5	4	5	가끔함	항상함	항상함	항상함	5	5	5	5	5	2	양호	해당사항 없음	없음	0	1	2	1	2	3	1	1	3
2020-08-19 20:46:13	남성	22-23세	2학년	간호학과	기독교	아니오	마시지 않는다	아니오(4번 문항으로)		아니오(5번 문항으로)		예(5-1번 문항으로)	파상풍-디프테리아	아니오(7번 문항으로)		3	2	4	3	4	5	4	4	4	4	4	5	항상함	항상함	항상함	항상함	4	4	4	4	4	2	양호	해당사항 없음	없음	0	1	3	3	1	0	3	1	1
2020-08-19 22:42:02	여성	22-23세	4학년	IT엔지리어링	기독교	아니오	주 1-2회	아니오(4번 문항으로)		아니오(5번 문항으로)		아니오(6번 문항으로)		예(6-1번 문항으로)		3	3	3	4	4	5	5	5	5	5	3	4	항상함	항상함	항상함	항상함	4	4	5	5	5	4	보통	해당사항 없음	증상경험 있음	1	2	2	2	3	2	1	2	2
2020-08-19 22:58:05	여성	29	3학년	간호학과	기독교	아니오	마시지 않는다	아니오(4번 문항으로)		아니오(5번 문항으로)		예(5-1번 문항으로)	A형간염/B형간염	예(6-1번 문항으로)	증명서 발급	4	3	5	5	5	5	4	4	5	5	3	5	가끔함	항상함	항상함	항상함	5	4	4	4	3	4	보통	해당사항 없음	없음	1	3	2	3	0	1	3	0	0
2020-08-19 23:41:54	여성	22-23세	2학년	인물/예술계열	무교	아니오	마시지 않는다	아니오(4번 문항으로)		아니오(5번 문항으로)		예(5-1번 문항으로)		아니오(7번 문항으로)		4	2	5	4	3	4	3	3	4	4	4	4	거의안함	항상함	가끔함	가끔함	3	3	3	3	3	3	양호하지 않음	해당사항 없음	없음	1	2	2	2	1	2	1	2	2
2020-08-20 00:22:09	여성	22-23세	4학년	자연과학계열	무교	아니오	마시지 않는다	아니오(4번 문항으로)		아니오(5번 문항으로)		아니오(6번 문항으로)		예(6-1번 문항으로)	장염	3	1	1	4	4	2	2	5	5	4	2	5	항상함	항상함	가끔함	가끔함	4	4	5	5	5	4	보통	해당사항 없음	없음	0	3	3	1	2	2	1	2	2
2020-08-20 00:25:51	남성	22-23세	2학년	간호학과를 제외한 보건/바이오 계열	무교	아니오	마시지 않는다	아니오(4번 문항으로)		아니오(5번 문항으로)		아니오(6번 문항으로)		아니오(7번 문항으로)		5	1	5	4	4	5	5	5	5	5	4	5	항상함	항상함	항상함	항상함	2	3	5	3	1	5	양호	해당사항 없음	없음	0	2	3	3	0	0	3	0	0
2020-08-20 00:31:44	여성	22-23세	4학년	자연과학계열	기독교	아니오	마시지 않는다	예(3-1번 문항으로)	빈혈, 비염	예(4-1번 문항으로)	만성비염	아니오(6번 문항으로)		예(6-1번 문항으로)	기저질환치료	4	5	4	5	5	5	5	3	4	5	4	4	항상함	항상함	항상함	항상함	5	5	5	5	5	5	양호	해당사항 없음	없음	1	2	3	3	2	2	3	1	2
2020-08-20 00:35:11	남성	26-27세	4학년	직장인	무교	예	마시지 않는다	아니오(4번 문항으로)		아니오(5번 문항으로)		예(5-1번 문항으로)	A형간염/B형간염	아니오(7번 문항으로)		3	3	4	5	4	3	4	3	5	5	5	4	항상함	항상함	항상함	항상함	5	5	5	5	5	5	양호	해당사항 없음	없음	3	3	3	2	2	2	3	3	3
2020-08-20 00:48:24	여성	22-23세	4학년	사회복지학과	무교	아니오	주 1-2회	아니오(4번 문항으로)		예(4-1번 문항으로)	비염, 축농증	아니오(6번 문항으로)		예(6-1번 문항으로)	감기	4	3	5	4	4	4	4	4	3	5	3	4	가끔함	항상함	항상함	항상함	5	2	4	5	5	5	보통	해당사항 없음	증상경험 있음	0	3	3	1	1	2	3	1	2
2020-08-20 00:50:57	여성	22-23세	4학년	사회과학계열	무교	아니오	마시지 않는다	아니오(4번 문항으로)		아니오(5번 문항으로)		예(5-1번 문항으로)	인플루엔자	아니오(7번 문항으로)		4	1	5	4	3	5	1	4	4	5	2	5	거의안함	항상함	항상함	거의안함	3	1	3	5	4	5	보통	격리 및 감시대상	없음	0	3	3	3	0	1	1	1	1
2020-08-20 06:48:32	남성	26-27세	4학년	간호학과를 제외한 보건/바이오 계열	무교	아니오	주 1-2회	아니오(4번 문항으로)		아니오(5번 문항으로)		예(5-1번 문항으로)	A형간염/B형간염	예(6-1번 문항으로)	예방접종	2	2	2	2	2	4	3	5	5	5	3	4	항상함	항상함	항상함	항상함	3	3	3	3	3	3	양호	해당사항 없음	없음	0	3	3	3	0	0	3	0	1
2020-08-20 10:49:38	여성	22-23세	4학년	간호학과	기독교	아니오	마시지 않는다	아니오(4번 문항으로)		아니오(5번 문항으로)		예(5-1번 문항으로)	인플루엔자	아니오(7번 문항으로)		5	5	5	5	5	5	3	5	4	5	4	4	가끔함	항상함	항상함	항상함	4	4	4	4	4	4	양호	해당사항 없음	없음	3	1	2	2	1	2	3	1	0
2020-08-20 11:16:28	남성	22-23세	2학년	간호학과를 제외한 보건/바이오 계열	기독교	아니오	마시지 않는다	아니오(4번 문항으로)		아니오(5번 문항으로)		예(5-1번 문항으로)	파상풍-디프테리아	예(6-1번 문항으로)	근육통치료	3	4	4	4	4	3	3	4	4	5	5	4	항상함	항상함	항상함	항상함	3	4	4	4	3	3	양호	해당사항 없음	없음	1	2	3	3	1	1	3	1	1
2020-08-20 16:15:47	여성	24-25세	3학년	간호학과	불교	예	마시지 않는다	아니오(4번 문항으로)		아니오(5번 문항으로)		예(5-1번 문항으로)	A형간염/B형간염	아니오(7번 문항으로)		4	2	4	3	4	5	3	5	5	5	3	3	항상함	항상함	항상함	항상함	3	3	4	3	3	5	양호	해당사항 없음	없음	0	2	3	2	1	1	2	0	1
2020-08-20 16:35:23	여성	22-23세	3학년	간호학과	무교	아니오	주 1-2회	아니오(4번 문항으로)		아니오(5번 문항으로)		예(5-1번 문항으로)	A형간염/B형간염	예(6-1번 문항으로)	역류성 식도염	4	3	5	4	4	5	3	5	5	5	3	2	항상함	항상함	항상함	항상함	4	4	4	4	4	5	양호	해당사항 없음	없음	1	2	3	3	1	1	2	1	3
2020-08-20 16:43:37	여성	23	4학년	간호학과	무교	예	주 1-2회	아니오(4번 문항으로)		아니오(5번 문항으로)		예(5-1번 문항으로)	A형간염/B형간염	예(6-1번 문항으로)	B형간염 항체검사	5	4	2	5	3	4	4	4	2	5	5	5	가끔함	항상함	항상함	항상함	5	4	3	3	4	4	양호	해당사항 없음	없음	0	1	2	3	2	3	3	1	1
2020-08-20 16:45:38	여성	26-27세	4학년	간호학과	기독교	예	주 1-2회	아니오(4번 문항으로)		아니오(5번 문항으로)		예(5-1번 문항으로)	A형간염/B형간염	예(6-1번 문항으로)	예방접종	5	5	5	5	5	4	3	5	5	5	3	3	항상함	항상함	항상함	가끔함	5	5	5	5	3	5	보통	해당사항 없음	없음	1	0	3	2	2	2	1	2	2
2020-08-20 18:46:24	남성	20-21세	1학년	인물/예술계열	무교	예	매일	아니오(4번 문항으로)		아니오(5번 문항으로)		아니오(6번 문항으로)		예(6-1번 문항으로)	기저질환치료	4	1	3	5	5	4	2	4	3	4	4	3	항상함	항상함	항상함	항상함	5	5	5	5	5	5	보통	해당사항 없음	증상경험 있음	2	2	2	2	2	2	2	2	2
2020-08-23 00:51:00	여성	20-21세	1학년	간호학과	무교	아니오	주 1-2회	아니오(4번 문항으로)		아니오(5번 문항으로)		아니오(6번 문항으로)		아니오(7번 문항으로)		4	1	5	3	4	4	4	4	5	5	4	5	항상함	항상함	항상함	항상함	4	4	4	4	4	3	양호	해당사항 없음	없음	0	2	3	3	1	1	3	0	2
2020-08-25 10:17:46	남성	26-27세	4학년	간호학과를 제외한 보건/바이오 계열	기독교	아니오	주 3-4회	아니오(4번 문항으로)		아니오(5번 문항으로)		예(5-1번 문항으로)	A형간염/B형간염	예(6-1번 문항으로)	근골격	2	2	3	2	3	4	4	4	4	3	4	3	가끔함	거의안함	가끔함	가끔함	3	3	2	3	2	4	보통	해당사항 없음	없음	0	3	2	2	1	2	1	2	1
2020-08-26 22:56:46	여성	22-23세	3학년	인물/예술계열	천주교	아니오	마시지 않는다	아니오(4번 문항으로)		예(4-1번 문항으로)	(만성)기관지염	아니오(6번 문항으로)		예(6-1번 문항으로)	잠복결핵검사	4	5	5	3	4	5	2	5	5	5	3	4	항상함	항상함	항상함	항상함	5	5	5	4	3	5	양호	해당사항 없음	없음	3	1	3	3	3	2	3	3	2
2020-09-01 19:31:08	여성	21	3학년	간호학과	무교	아니오	주 1-2회	아니오(4번 문항으로)		아니오(5번 문항으로)		예(5-1번 문항으로)	A형간염/B형간염	예(6-1번 문항으로)	기저질환치료	5	4	4	5	5	4	4	3	5	5	5	5	가끔함	항상함	가끔함	항상함	4	3	3	3	4	4	양호	해당사항 없음	없음	0	3	3	3	0	0	3	1	1
2020-09-03 18:37:24	여성	23	4학년	간호학과	무교	아니오	마시지 않는다	아니오(4번 문항으로)		아니오(5번 문항으로)		예(5-1번 문항으로)	A형간염/B형간염	아니오(7번 문항으로)		5	4	2	5	4	4	5	4	4	5	5	4	항상함	항상함	항상함	항상함	5	4	4	4	3	5	양호	해당사항 없음	없음	1	3	3	3	0	0	3	1	1
2020-09-03 18:41:44	여성	22-23세	3학년	사회과학계열	무교	아니오	주 1-2회	아니오(4번 문항으로)		아니오(5번 문항으로)		아니오(6번 문항으로)		예(6-1번 문항으로)	보건증 발급	5	5	5	5	5	5	4	5	5	5	4	5	가끔함	항상함	항상함	가끔함	5	5	5	5	5	4	양호	해당사항 없음	없음	3	3	3	3	0	1	1	1	1
2020-09-03 18:45:21	여성	22-23세	4학년	인물/예술계열	기독교	아니오	주 1-2회	아니오(4번 문항으로)		아니오(5번 문항으로)		아니오(6번 문항으로)		예(6-1번 문항으로)	ㅇ	5	5	5	5	5	4	4	4	5	4	4	5	항상함	항상함	항상함	항상함	3	4	5	4	3	5	보통	해당사항 없음	없음	1	1	2	0	3	2	2	2	1
2020-09-03 18:58:25	여성	22-23세	3학년	인문사회	무교	아니오	마시지 않는다	아니오(4번 문항으로)		아니오(5번 문항으로)		아니오(6번 문항으로)		아니오(7번 문항으로)		5	5	5	5	4	4	3	5	5	5	5	5	항상함	항상함	항상함	항상함	4	4	5	5	4	5	보통	해당사항 없음	없음	2	0	2	0	2	3	1	2	1
2020-09-03 18:59:41	여성	22-23세	2학년	인물/예술계열	기독교	아니오	마시지 않는다	아니오(4번 문항으로)		아니오(5번 문항으로)		아니오(6번 문항으로)		아니오(7번 문항으로)		5	5	5	5	5	5	4	5	5	5	4	5	가끔함	항상함	항상함	항상함	4	4	4	4	4	4	양호	해당사항 없음	없음	1	2	3	1	1	1	2	1	2
2020-09-03 19:01:49	여성	22-23세	3학년	사회과학계열	기독교	예	주 1-2회	아니오(4번 문항으로)		아니오(5번 문항으로)		아니오(6번 문항으로)		예(6-1번 문항으로)	감기	5	5	5	5	5	5	4	5	5	5	5	5	항상함	항상함	항상함	항상함	5	5	4	5	4	5	보통	해당사항 없음	없음	1	1	1	2	2	3	2	1	2
2020-09-03 19:49:20	여성	22-23세	4학년	어문계열	무교	아니오	주 1-2회	아니오(4번 문항으로)		아니오(5번 문항으로)		아니오(6번 문항으로)		아니오(7번 문항으로)		4	3	5	5	4	5	3	5	4	5	4	5	항상함	항상함	항상함	항상함	4	4	4	4	5	4	양호	해당사항 없음	없음	0	2	3	2	1	1	2	1	2
2020-09-06 00:24:02	남성	24-25세	4학년	인물/예술계열	무교	예	주 1-2회	아니오(4번 문항으로)		아니오(5번 문항으로)		아니오(6번 문항으로)		예(6-1번 문항으로)	부상	3	1	5	5	3	5	3	5	4	5	3	5	항상함	항상함	항상함	항상함	5	5	5	5	5	3	보통	해당사항 없음	없음	2	0	1	2	3	3	3	3	3
2020-09-07 13:31:22	여성	20-21세	2학년	IT엔지리어링	무교	아니오	마시지 않는다	아니오(4번 문항으로)		아니오(5번 문항으로)		아니오(6번 문항으로)		아니오(7번 문항으로)		3	4	5	3	3	3	5	5	5	5	5	5	항상함	항상함	항상함	항상함	4	4	4	4	1	5	양호	해당사항 없음	없음	0	3	3	3	1	3	3	0	0
2020-09-07 14:56:35	여성	20-21세	1학년	간호학과	기독교	아니오	마시지 않는다	아니오(4번 문항으로)		아니오(5번 문항으로)		아니오(6번 문항으로)		아니오(7번 문항으로)		5	1	5	5	5	5	2	5	5	5	5	5	항상함	항상함	항상함	항상함	5	5	5	5	5	5	양호	해당사항 없음	없음	1	3	3	3	1	1	3	1	1
2020-09-07 16:09:53	여성	26-27세	3학년	간호학과	무교	아니오	주 1-2회	아니오(4번 문항으로)		아니오(5번 문항으로)		예(5-1번 문항으로)	A형간염/B형간염	예(6-1번 문항으로)	예방접종	4	3	4	4	3	5	4	4	5	5	3	3	항상함	항상함	항상함	항상함	4	4	4	5	4	5	양호	해당사항 없음	없음	1	2	3	3	1	1	3	1	0
2020-09-09 14:40:19	여성	30	3학년	간호학과	불교	아니오	주 1-2회	아니오(4번 문항으로)		아니오(5번 문항으로)		예(5-1번 문항으로)	인플루엔자	예(6-1번 문항으로)	예방접종	5	5	4	5	5	5	5	4	5	4	5	3	항상함	항상함	항상함	항상함	5	4	4	4	5	4	보통	해당사항 없음	없음	1	1	2	2	0	2	2	1	2
2020-09-10 14:36:41	남성	25	3학년	간호학과	무교	예	주 1-2회	아니오(4번 문항으로)		아니오(5번 문항으로)		예(5-1번 문항으로)	A형간염/B형간염	예(6-1번 문항으로)	피부과	4	4	3	4	4	4	4	4	4	5	4	3	항상함	항상함	항상함	항상함	4	4	4	4	5	4	양호	해당사항 없음	없음	1	1	2	2	2	1	1	1	1
2020-09-10 16:29:12	여성	22-23세	3학년	간호학과	천주교	아니오	주 1-2회	아니오(4번 문항으로)		아니오(5번 문항으로)		아니오(6번 문항으로)		아니오(7번 문항으로)		4	2	4	5	5	4	4	5	5	5	3	4	항상함	항상함	항상함	항상함	4	3	4	4	4	5	양호	해당사항 없음	없음	1	1	3	0	2	3	0	1	2
2020-09-11 12:18:08	여성	22-23세	3학년	간호학과	무교	아니오	주 1-2회	아니오(4번 문항으로)		아니오(5번 문항으로)		예(5-1번 문항으로)	A형간염/B형간염	아니오(7번 문항으로)		5	3	5	5	5	5	4	5	5	5	5	5	항상함	항상함	항상함	가끔함	5	5	4	3	4	5	양호	해당사항 없음	없음	2	2	1	0	2	2	1	2	2
2020-09-11 14:32:09	여성	22-23세	3학년	간호학과	무교	아니오	주 1-2회	아니오(4번 문항으로)		아니오(5번 문항으로)		예(5-1번 문항으로)	A형간염/B형간염	아니오(7번 문항으로)		5	2	5	5	5	4	3	5	3	5	5	5	항상함	항상함	항상함	가끔함	3	2	5	5	3	5	양호	해당사항 없음	없음	0	3	3	3	1	1	2	3	1
2020-09-11 16:51:43	여성	23	4학년	간호학과	무교	예	주 1-2회	아니오(4번 문항으로)		아니오(5번 문항으로)		아니오(6번 문항으로)		예(6-1번 문항으로)	B형간염 항체검사	5	4	2	4	4	4	5	5	5	5	5	4	항상함	항상함	항상함	항상함	5	4	3	3	4	4	양호	해당사항 없음	없음	1	0	2	1	1	1	3	1	0
2020-09-11 16:52:02	여성	23	3학년	간호학과	무교	아니오	주 1-2회	아니오(4번 문항으로)		아니오(5번 문항으로)		예(5-1번 문항으로)	A형간염/B형간염	아니오(7번 문항으로)		5	5	5	5	4	5	4	5	5	5	5	5	항상함	항상함	항상함	항상함	5	5	5	4	3	5	양호	해당사항 없음	없음	0	3	3	3	0	0	3	0	0
2020-09-11 16:52:17	여성	27	3학년	간호학과	기독교	예	주 1-2회	아니오(4번 문항으로)		아니오(5번 문항으로)		예(5-1번 문항으로)	A형간염/B형간염	예(6-1번 문항으로)	예방접종	4	5	5	5	5	5	4	4	5	5	5	4	항상함	항상함	항상함	항상함	5	5	4	3	5	5	보통	해당사항 없음	없음	2	0	2	2	3	3	2	2	2
2020-09-11 16:55:01	여성	23	4학년	간호학과	무교	예	주 1-2회	아니오(4번 문항으로)		아니오(5번 문항으로)		아니오(6번 문항으로)		예(6-1번 문항으로)	B형간염 항체검사	5	3	2	4	4	4	5	5	5	5	5	4	항상함	항상함	항상함	항상함	4	4	3	3	4	4	양호	해당사항 없음	없음	1	1	2	3	1	2	3	1	1
2020-09-11 16:55:47	여성	23	3학년	간호학과	기독교	아니오	마시지 않는다	아니오(4번 문항으로)		아니오(5번 문항으로)		예(5-1번 문항으로)	MMR	예(6-1번 문항으로)	흉부 X-ray 촬영(제출용)	4	4	2	4	4	4	4	3	4	5	5	4	가끔함	항상함	항상함	가끔함	1	5	4	4	3	4	양호	해당사항 없음	없음	1	3	3	3	1	1	3	0	1
2020-09-11 16:57:18	여성	23	3학년	간호학과	무교	아니오	마시지 않는다	아니오(4번 문항으로)		아니오(5번 문항으로)		아니오(6번 문항으로)		아니오(7번 문항으로)		5	5	5	5	5	5	5	5	5	5	5	5	항상함	항상함	항상함	항상함	4	5	2	2	4	4	양호	해당사항 없음	없음	0	3	3	3	2	1	2	0	1
2020-09-11 16:57:54	남성	25	3학년	간호학과	무교	아니오	마시지 않는다	아니오(4번 문항으로)		예(4-1번 문항으로)	천식	예(5-1번 문항으로)	A형간염/B형간염	예(6-1번 문항으로)	사랑니 제거	5	5	5	5	5	5	5	5	5	5	5	5	항상함	항상함	항상함	항상함	3	3	3	3	5	3	양호	해당사항 없음	증상경험 있음	0	3	3	3	1	1	3	1	0
2020-09-11 16:58:43	여성	22-23세	3학년	간호학과	무교	아니오	마시지 않는다	아니오(4번 문항으로)		아니오(5번 문항으로)		예(5-1번 문항으로)	A형간염/B형간염	예(6-1번 문항으로)	흉부엑스레이	4	5	5	5	5	5	5	5	5	5	5	5	항상함	항상함	항상함	항상함	5	4	4	2	5	4	양호	해당사항 없음	없음	1	1	1	2	3	2	0	1	2
2020-09-11 16:59:04	여성	22-23세	3학년	간호학과	무교	아니오	마시지 않는다	아니오(4번 문항으로)		아니오(5번 문항으로)		예(5-1번 문항으로)	인플루엔자	아니오(7번 문항으로)		5	4	4	5	4	4	5	4	5	5	5	4	가끔함	항상함	항상함	항상함	5	4	5	4	3	5	양호	해당사항 없음	없음	1	3	3	3	0	0	3	1	1
2020-09-11 16:59:58	여성	28	3학년	간호학과	기독교	아니오	마시지 않는다	아니오(4번 문항으로)		아니오(5번 문항으로)		예(5-1번 문항으로)	A형간염/B형간염	예(6-1번 문항으로)	X ray촬영	5	4	2	4	5	4	5	4	4	5	5	3	가끔함	항상함	항상함	항상함	4	3	4	3	4	5	보통	해당사항 없음	없음	2	3	2	3	1	1	3	1	1
2020-09-11 17:02:22	여성	22-23세	3학년	간호학과	기독교	아니오	마시지 않는다	아니오(4번 문항으로)		아니오(5번 문항으로)		예(5-1번 문항으로)	A형간염/B형간염	아니오(7번 문항으로)		4	2	3	4	4	4	5	3	5	4	5	4	가끔함	항상함	항상함	항상함	5	5	5	5	2	5	양호	해당사항 없음	없음	0	3	3	3	1	1	3	0	1
2020-09-11 17:13:18	여성	24-25세	3학년	간호학과	불교	예	주 1-2회	아니오(4번 문항으로)		아니오(5번 문항으로)		예(5-1번 문항으로)	A형간염/B형간염	예(6-1번 문항으로)	기저질환치료	3	3	2	5	5	3	5	4	4	5	5	3	항상함	항상함	항상함	항상함	5	4	3	3	4	4	양호	해당사항 없음	없음	1	3	3	1	1	1	2	1	1
2020-09-11 17:34:23	여성	22-23세	3학년	간호학과	무교	아니오	주 1-2회	아니오(4번 문항으로)		아니오(5번 문항으로)		예(5-1번 문항으로)	A형간염/B형간염	예(6-1번 문항으로)	예방접종	5	5	5	5	5	5	5	5	5	5	5	5	항상함	항상함	항상함	항상함	5	5	5	5	5	5	양호	해당사항 없음	없음	2	0	1	0	2	0	0	2	2
2020-09-11 17:37:50	여성	22-23세	3학년	간호학과	무교	아니오	마시지 않는다	아니오(4번 문항으로)		아니오(5번 문항으로)		예(5-1번 문항으로)	A형간염/B형간염	아니오(7번 문항으로)		2	4	4	5	3	4	4	3	5	5	5	4	항상함	항상함	항상함	항상함	3	2	4	3	4	4	양호	해당사항 없음	없음	1	3	3	3	2	2	3	1	1
2020-09-11 17:45:05	여성	22-23세	3학년	간호학과	천주교	아니오	마시지 않는다	아니오(4번 문항으로)		아니오(5번 문항으로)		예(5-1번 문항으로)	가다실9	예(6-1번 문항으로)	예방접종	4	4	4	5	5	4	5	5	1	5	5	5	항상함	항상함	항상함	항상함	4	5	4	4	2	4	양호	해당사항 없음	없음	0	3	3	3	0	0	3	2	0
2020-09-11 17:46:37	여성	22-23세	3학년	간호학과	무교	아니오	주 1-2회	아니오(4번 문항으로)		아니오(5번 문항으로)		예(5-1번 문항으로)	파상풍 디프테리아 a, b형간염	아니오(7번 문항으로)		4	3	3	3	3	4	5	3	4	4	5	3	항상함	항상함	항상함	항상함	4	4	4	3	4	4	양호	해당사항 없음	없음	2	1	0	1	2	2	0	2	2
2020-09-11 17:55:56	여성	22-23세	3학년	간호학과	무교	예	주 1-2회	아니오(4번 문항으로)		아니오(5번 문항으로)		예(5-1번 문항으로)	A형간염/B형간염	예(6-1번 문항으로)	감기	2	3	2	2	4	3	3	5	5	5	5	4	항상함	항상함	항상함	항상함	3	3	3	3	3	3	보통	해당사항 없음	없음	0	3	3	2	2	2	2	1	1
2020-09-11 18:05:37	여성	24-25세	3학년	간호학과	무교	아니오	마시지 않는다	아니오(4번 문항으로)		아니오(5번 문항으로)		예(5-1번 문항으로)	A형간염/B형간염	예(6-1번 문항으로)	예방접종	4	3	3	5	5	4	5	5	5	3	5	3	항상함	항상함	항상함	항상함	3	3	3	3	4	3	양호	해당사항 없음	없음	0	1	3	2	2	2	2	2	1
2020-09-11 22:59:27	여성	22-23세	3학년	간호학과	천주교	아니오	주 1-2회	아니오(4번 문항으로)		아니오(5번 문항으로)		예(5-1번 문항으로)	A형간염/B형간염	아니오(7번 문항으로)		5	4	4	5	4	5	5	5	5	5	5	5	항상함	항상함	항상함	항상함	4	4	4	4	5	4	보통	해당사항 없음	없음	1	2	2	2	1	1	3	1	1
2020-09-11 23:30:54	여성	22-23세	3학년	간호학과	무교	아니오	주 1-2회	아니오(4번 문항으로)		아니오(5번 문항으로)		예(5-1번 문항으로)	A형간염/B형간염	아니오(7번 문항으로)		5	5	5	5	4	5	4	5	4	5	5	5	항상함	항상함	항상함	가끔함	4	4	4	4	3	4	양호	해당사항 없음	없음	1	3	1	2	0	0	3	1	2
2020-09-12 10:50:49	여성	22-23세	3학년	간호학과	무교	아니오	마시지 않는다	아니오(4번 문항으로)		아니오(5번 문항으로)		예(5-1번 문항으로)	a형간염 홍역	예(6-1번 문항으로)	배아파서	3	4	3	5	3	4	5	3	5	5	4	3	항상함	항상함	항상함	항상함	3	5	3	2	5	3	보통	해당사항 없음	없음	2	0	2	1	2	3	1	2	2
2020-09-13 14:41:39	여성	22-23세	3학년	간호학과	기독교	아니오	주 1-2회	아니오(4번 문항으로)		예(4-1번 문항으로)	(만성)기관지염	예(5-1번 문항으로)	A형간염/B형간염	예(6-1번 문항으로)	예방접종	5	4	1	4	4	3	5	5	5	5	5	4	항상함	항상함	항상함	항상함	5	5	5	5	3	4	양호	해당사항 없음	없음	2	1	3	1	3	3	1	2	2
2020-09-13 18:52:29	남성	22-23세	2학년	간호학과	무교	아니오	주 1-2회	아니오(4번 문항으로)		예(4-1번 문항으로)	(만성)기관지염	예(5-1번 문항으로)	인플루엔자	예(6-1번 문항으로)	예방접종	4	3	3	3	4	4	5	4	4	4	4	4	가끔함	항상함	항상함	항상함	3	3	3	3	4	3	보통	해당사항 없음	없음	0	1	0	1	1	1	1	1	1
2020-09-13 20:04:36	여성	22-23세	3학년	간호학과	천주교	아니오	주 1-2회	아니오(4번 문항으로)		아니오(5번 문항으로)		예(5-1번 문항으로)	A형간염/B형간염	예(6-1번 문항으로)	예방접종	5	4	2	4	4	4	5	5	5	4	5	5	항상함	항상함	항상함	항상함	5	5	5	5	5	5	양호	해당사항 없음	없음	2	3	3	3	2	2	3	2	1
2020-09-13 20:53:09	여성	22-23세	3학년	간호학과	무교	아니오	주 1-2회	아니오(4번 문항으로)		아니오(5번 문항으로)		예(5-1번 문항으로)	A형간염/B형간염	아니오(7번 문항으로)		4	5	3	4	4	4	5	3	5	3	5	4	항상함	항상함	항상함	항상함	4	3	3	3	4	4	보통	해당사항 없음	없음	0	1	2	1	1	1	1	1	2
2020-09-14 18:14:36	여성	22-23세	3학년	간호학과	기독교	아니오	마시지 않는다	아니오(4번 문항으로)		아니오(5번 문항으로)		예(5-1번 문항으로)	파상풍-디프테리아	아니오(7번 문항으로)		5	5	5	5	5	5	4	3	2	5	5	5	항상함	항상함	항상함	항상함	5	5	5	5	5	5	양호	해당사항 없음	없음	0	1	3	3	0	0	3	1	2
2020-09-14 18:19:03	여성	22-23세	3학년	간호학과	무교	아니오	마시지 않는다	아니오(4번 문항으로)		아니오(5번 문항으로)		예(5-1번 문항으로)	A형간염/B형간염	예(6-1번 문항으로)	기저질환치료	5	4	3	4	4	4	4	3	4	4	5	4	가끔함	항상함	항상함	항상함	4	4	4	4	3	4	양호	해당사항 없음	없음	1	2	2	3	1	1	3	1	1
2020-09-15 18:24:38	여성	20-21세	3학년	간호학과	천주교	아니오	마시지 않는다	아니오(4번 문항으로)		아니오(5번 문항으로)		예(5-1번 문항으로)	A형간염/B형간염	예(6-1번 문항으로)	예방접종	5	4	4	5	4	4	5	5	5	5	5	5	항상함	항상함	항상함	항상함	4	4	4	3	3	4	양호	해당사항 없음	없음	1	3	3	3	0	1	3	0	0
2020-09-15 19:09:52	여성	22-23세	3학년	간호학과	무교	아니오	주 1-2회	아니오(4번 문항으로)		아니오(5번 문항으로)		예(5-1번 문항으로)	A형간염/B형간염	예(6-1번 문항으로)	보건증	2	4	1	5	5	5	5	4	5	3	5	3	항상함	항상함	항상함	항상함	5	3	3	4	3	3	양호	해당사항 없음	없음	0	3	3	3	1	0	3	1	1
2020-09-15 19:37:26	여성	22-23세	3학년	간호학과	무교	아니오	주 1-2회	아니오(4번 문항으로)		아니오(5번 문항으로)		예(5-1번 문항으로)	A형간염/B형간염	예(6-1번 문항으로)	치과진료	2	4	1	5	3	4	5	4	2	5	5	2	항상함	항상함	항상함	항상함	2	2	2	2	3	2	양호	해당사항 없음	없음	0	3	1	3	2	2	3	2	1
2020-09-16 21:12:46	여성	22-23세	3학년	간호학과	무교	아니오	마시지 않는다	아니오(4번 문항으로)		아니오(5번 문항으로)		아니오(6번 문항으로)		아니오(7번 문항으로)		5	5	5	4	3	4	4	4	5	5	5	5	가끔함	가끔함	가끔함	항상함	4	5	5	5	4	4	보통	해당사항 없음	없음	1	3	3	3	1	2	1	0	1
2020-09-17 15:19:06	여성	22-23세	4학년	간호학과	기독교	아니오	마시지 않는다	아니오(4번 문항으로)		아니오(5번 문항으로)		예(5-1번 문항으로)	인플루엔자	아니오(7번 문항으로)		5	5	5	4	4	5	5	5	5	5	5	5	가끔함	항상함	항상함	항상함	2	2	2	2	2	5	보통	격리 및 감시대상	증상경험 있음	1	1	1	0	2	2	1	2	2
2020-09-19 01:17:09	여성	22-23세	3학년	간호학과	천주교	예	마시지 않는다	아니오(4번 문항으로)		아니오(5번 문항으로)		예(5-1번 문항으로)	A형간염/B형간염	아니오(7번 문항으로)		5	5	4	5	5	5	4	3	5	5	5	5	가끔함	항상함	가끔함	가끔함	2	2	2	2	5	2	양호하지 않음	해당사항 없음	없음	1	3	2	3	1	1	3	1	1
2020-09-19 15:20:17	남성	24-25세	3학년	간호학과	무교	아니오	마시지 않는다	아니오(4번 문항으로)		아니오(5번 문항으로)		예(5-1번 문항으로)	A형간염/B형간염	예(6-1번 문항으로)	예방접종	4	2	1	1	5	2	5	5	5	5	5	3	항상함	항상함	항상함	항상함	5	1	2	2	3	5	보통	해당사항 없음	없음	1	2	2	3	0	0	3	1	1
2020-09-20 18:17:22	여성	20-21세	3학년	간호학과	무교	아니오	마시지 않는다	아니오(4번 문항으로)		아니오(5번 문항으로)		예(5-1번 문항으로)	A형간염/B형간염	아니오(7번 문항으로)		5	3	2	4	3	4	4	2	5	5	5	5	항상함	항상함	항상함	항상함	5	4	4	3	3	5	양호	해당사항 없음	없음	0	1	3	3	2	2	3	1	1
2020-09-21 00:13:06	여성	22-23세	3학년	간호학과	불교	아니오	마시지 않는다	아니오(4번 문항으로)		아니오(5번 문항으로)		예(5-1번 문항으로)	파상풍-디프테리아	예(6-1번 문항으로)	감기	5	5	4	5	5	5	5	5	5	5	5	5	항상함	항상함	항상함	항상함	4	5	4	5	5	4	보통	해당사항 없음	없음	2	2	2	3	2	2	2	1	1
2020-09-21 13:10:33	남성	24-25세	3학년	간호학과	무교	아니오	주 1-2회	아니오(4번 문항으로)		아니오(5번 문항으로)		예(5-1번 문항으로)	A형간염/B형간염	예(6-1번 문항으로)	장염	5	4	4	5	4	5	3	2	4	4	5	3	가끔함	항상함	가끔함	항상함	4	4	5	3	5	4	보통	해당사항 없음	없음	1	1	3	2	2	2	3	1	1
2020-09-21 13:11:33	여성	22-23세	3학년	간호학과	기독교	아니오	마시지 않는다	아니오(4번 문항으로)		아니오(5번 문항으로)		예(5-1번 문항으로)	A형간염/B형간염	예(6-1번 문항으로)	감기	4	4	4	4	4	4	4	4	4	4	4	5	가끔함	항상함	항상함	항상함	3	3	3	3	4	3	양호	해당사항 없음	없음	1	2	1	1	1	1	1	1	1
2020-09-21 16:27:40	여성	22-23세	3학년	간호학과	무교	아니오	마시지 않는다	아니오(4번 문항으로)		아니오(5번 문항으로)		예(5-1번 문항으로)	A형간염/B형간염	예(6-1번 문항으로)	예방접종	5	5	4	5	5	5	5	5	5	5	5	5	항상함	항상함	항상함	항상함	5	2	2	2	5	4	보통	해당사항 없음	없음	2	0	0	1	3	2	0	2	3
2020-09-21 19:27:50	여성	20-21세	3학년	간호학과	무교	아니오	마시지 않는다	아니오(4번 문항으로)		아니오(5번 문항으로)		예(5-1번 문항으로)	A형간염/B형간염	아니오(7번 문항으로)		5	4	3	4	5	5	4	4	5	5	5	4	항상함	항상함	항상함	가끔함	3	2	3	2	4	4	양호	해당사항 없음	없음	2	1	3	1	2	2	2	3	3
2020-09-21 22:06:50	여성	22-23세	3학년	간호학과	기독교	아니오	마시지 않는다	아니오(4번 문항으로)		아니오(5번 문항으로)		예(5-1번 문항으로)	A형간염/B형간염	아니오(7번 문항으로)		4	4	3	4	4	4	5	3	3	3	5	3	가끔함	항상함	항상함	항상함	4	4	3	4	4	4	양호	해당사항 없음	없음	0	3	3	2	0	1	2	0	0
2020-09-22 00:05:09	여성	22-23세	3학년	간호학과	무교	아니오	마시지 않는다	아니오(4번 문항으로)		아니오(5번 문항으로)		예(5-1번 문항으로)	디프테리아, A형 간염, 수두	아니오(7번 문항으로)		5	5	5	5	4	5	5	4	5	5	5	5	항상함	항상함	항상함	항상함	4	5	5	5	4	5	양호	해당사항 없음	없음	0	1	3	3	0	0	3	0	0
2020-09-22 13:51:38	여성	22-23세	3학년	간호학과	무교	아니오	주 1-2회	아니오(4번 문항으로)		아니오(5번 문항으로)		예(5-1번 문항으로)	A형간염/B형간염	예(6-1번 문항으로)	기저질환치료	5	4	4	4	4	4	5	4	5	5	5	4	항상함	항상함	항상함	항상함	5	5	4	5	4	4	보통	해당사항 없음	없음	2	3	3	3	2	2	1	2	2
2020-09-23 15:27:54	여성	20-21세	2학년	인물/예술계열	무교	예	마시지 않는다	아니오(4번 문항으로)		아니오(5번 문항으로)		예(5-1번 문항으로)	독감, 폐렴구균	예(6-1번 문항으로)	예방접종	3	1	5	4	3	5	5	5	5	5	4	4	항상함	항상함	항상함	항상함	5	5	5	5	5	5	양호	해당사항 없음	없음	2	1	3	2	3	3	1	2	2
2020-09-23 15:27:59	여성	20-21세	2학년	인물/예술계열	무교	예	마시지 않는다	아니오(4번 문항으로)		아니오(5번 문항으로)		예(5-1번 문항으로)	독감, 폐렴구균	예(6-1번 문항으로)	예방접종	3	1	5	4	3	5	5	5	5	5	4	4	항상함	항상함	항상함	항상함	5	5	5	5	5	5	양호	해당사항 없음	없음	2	1	3	2	3	3	1	2	2
2020-09-23 16:39:47	여성	22-23세	3학년	인물/예술계열	무교	아니오	주 1-2회	아니오(4번 문항으로)		예(4-1번 문항으로)	비염	아니오(6번 문항으로)		예(6-1번 문항으로)	항체주사 맞기 위함	5	3	4	5	5	4	2	5	5	5	4	3	가끔함	항상함	항상함	항상함	4	3	5	2	3	4	보통	해당사항 없음	없음	2	2	3	3	2	2	1	0	2
2020-09-23 21:15:27	여성	22-23세	3학년	간호학과	무교	아니오	주 1-2회	아니오(4번 문항으로)		예(4-1번 문항으로)	결핵	예(5-1번 문항으로)	A형간염/B형간염	아니오(7번 문항으로)		5	4	5	4	4	5	4	4	4	5	5	3	가끔함	항상함	가끔함	항상함	4	4	4	4	3	4	양호	해당사항 없음	증상경험 있음	0	2	3	3	1	1	3	0	0
2020-09-23 21:22:17	여성	20-21세	2학년	간호학과	무교	아니오	마시지 않는다	아니오(4번 문항으로)		아니오(5번 문항으로)		예(5-1번 문항으로)	자궁경부암	예(6-1번 문항으로)	감기	4	3	4	5	4	4	2	5	4	5	4	5	항상함	항상함	항상함	항상함	3	3	3	3	3	4	보통	해당사항 없음	없음	1	2	3	2	2	2	3	2	1
2020-09-24 02:34:28	남성	24-25세	3학년	인물/예술계열	무교	아니오	마시지 않는다	아니오(4번 문항으로)		아니오(5번 문항으로)		아니오(6번 문항으로)		아니오(7번 문항으로)		3	5	5	5	5	5	3	3	4	5	4	3	항상함	항상함	항상함	항상함	3	4	4	4	3	4	양호	해당사항 없음	없음	0	3	3	3	0	0	3	0	1
2020-09-24 19:08:43	남성	22-23세	2학년	간호학과	무교	아니오	마시지 않는다	아니오(4번 문항으로)		예(4-1번 문항으로)	(만성)기관지염	예(5-1번 문항으로)	신증후군출혈열	예(6-1번 문항으로)	건강검진	3	4	4	4	5	5	5	5	4	4	3	3	가끔함	항상함	가끔함	항상함	4	5	4	4	5	3	보통	해당사항 없음	없음	1	3	3	1	2	1	1	2	2
2020-09-24 19:12:41	여성	22-23세	3학년	간호학과	무교	아니오	주 1-2회	아니오(4번 문항으로)		아니오(5번 문항으로)		예(5-1번 문항으로)	A형간염/B형간염	아니오(7번 문항으로)		4	5	3	5	4	5	4	5	4	4	4	4	가끔함	항상함	항상함	가끔함	3	3	3	3	4	3	양호	해당사항 없음	없음	1	3	3	3	1	1	3	1	1
2020-09-24 19:20:12	여성	22-23세	3학년	간호학과	무교	아니오	주 1-2회	아니오(4번 문항으로)		아니오(5번 문항으로)		예(5-1번 문항으로)	A형간염/B형간염	아니오(7번 문항으로)		5	2	2	3	2	3	4	4	3	5	5	3	가끔함	항상함	항상함	항상함	4	2	2	3	2	4	양호	해당사항 없음	없음	0	3	3	3	1	2	3	1	1
2020-09-24 19:31:28	여성	22-23세	4학년	간호학과	무교	예	주 1-2회	아니오(4번 문항으로)		아니오(5번 문항으로)		아니오(6번 문항으로)		예(6-1번 문항으로)	B형간염 항체검사	5	4	2	4	4	4	5	5	5	5	5	4	항상함	항상함	항상함	항상함	5	5	4	4	4	4	양호	해당사항 없음	없음	1	0	1	1	3	2	3	2	1
2020-09-24 22:52:44	남성	22-23세	3학년	간호학과	기독교	아니오	주 1-2회	아니오(4번 문항으로)		아니오(5번 문항으로)		아니오(6번 문항으로)		아니오(7번 문항으로)		5	2	1	3	4	4	5	4	4	5	4	5	가끔함	가끔함	항상함	항상함	5	5	4	4	4	4	양호	해당사항 없음	없음	0	3	3	3	0	1	3	1	0
2020-09-24 23:29:28	여성	22-23세	3학년	간호학과	천주교	아니오	마시지 않는다	아니오(4번 문항으로)		아니오(5번 문항으로)		예(5-1번 문항으로)	A형간염/B형간염	아니오(7번 문항으로)		5	4	3	5	4	4	5	4	5	5	5	5	항상함	항상함	항상함	항상함	3	3	4	4	3	3	양호	해당사항 없음	없음	0	3	3	2	0	1	2	1	1
2020-09-25 18:21:58	여성	22-23세	3학년	간호학과	천주교	아니오	마시지 않는다	아니오(4번 문항으로)		아니오(5번 문항으로)		예(5-1번 문항으로)	A형간염/B형간염	예(6-1번 문항으로)	감기	5	4	3	3	4	5	4	2	4	4	5	5	거의안함	항상함	항상함	항상함	5	3	3	2	5	4	양호	해당사항 없음	없음	1	2	3	3	2	2	3	1	1
2020-09-26 00:47:03	남성	22-23세	3학년	간호학과	기독교	아니오	주 1-2회	아니오(4번 문항으로)		아니오(5번 문항으로)		아니오(6번 문항으로)	A형간염/B형간염	예(6-1번 문항으로)	예방접종	4	3	3	3	3	2	4	5	5	5	4	5	가끔함	가끔함	가끔함	안함	5	4	5	4	5	5	양호하지 않음	해당사항 없음	없음	3	2	1	1	2	3	2	1	2
2020-09-26 17:40:47	여성	22-23세	3학년	간호학과	무교	아니오	마시지 않는다	아니오(4번 문항으로)		아니오(5번 문항으로)		예(5-1번 문항으로)	가다실9	예(6-1번 문항으로)	여드름 치료	3	5	2	5	4	5	4	2	5	5	5	3	거의안함	항상함	항상함	항상함	4	5	5	5	4	4	양호하지 않음	해당사항 없음	없음	2	1	3	3	1	1	3	2	2
2020-09-26 18:16:29	여성	22-23세	3학년	간호학과	무교	아니오	주 1-2회	아니오(4번 문항으로)		아니오(5번 문항으로)		예(5-1번 문항으로)	A형간염/B형간염	예(6-1번 문항으로)	예방접종	3	5	2	5	5	5	5	3	3	4	5	3	항상함	항상함	항상함	가끔함	5	4	4	4	4	5	양호	해당사항 없음	없음	2	2	3	3	1	1	3	0	1
2020-10-04 16:25:24	여성	22-23세	3학년	간호학과	기독교	아니오	주 1-2회	아니오(4번 문항으로)		아니오(5번 문항으로)		예(5-1번 문항으로)	A형간염/B형간염	예(6-1번 문항으로)	흉부 엑스레이	5	4	4	5	4	4	5	3	5	5	5	3	항상함	항상함	항상함	항상함	5	5	5	5	3	5	양호	해당사항 없음	없음	0	2	3	3	1	1	3	0	1
2020-10-09 16:25:49	여성	26-27세	4학년	사회과학계열	무교	예	주 1-2회	아니오(4번 문항으로)		아니오(5번 문항으로)		아니오(6번 문항으로)		예(6-1번 문항으로)	산부인과	2	4	4	4	4	4	5	5	5	5	3	3	항상함	항상함	항상함	항상함	3	4	4	4	4	4	양호	해당사항 없음	없음	1	3	3	3	0	0	3	1	1
2020-10-09 16:26:44	남성	28세	4학년	기계학	무교	아니오	주 1-2회	예(3-1번 문항으로)	고혈압	예(4-1번 문항으로)	(만성)기관지염	아니오(6번 문항으로)		아니오(7번 문항으로)		5	3	5	4	5	4	4	5	5	5	3	4	항상함	항상함	항상함	항상함	4	5	5	3	3	5	양호	해당사항 없음	없음	0	2	1	1	2	1	2	1	2
2020-10-09 16:36:28	여성	28세	4학년	문화관광	천주교	아니오	주 1-2회	아니오(4번 문항으로)		아니오(5번 문항으로)		예(5-1번 문항으로)	독감주사	예(6-1번 문항으로)	예방접종	4	4	4	4	4	5	5	4	4	5	3	4	항상함	항상함	항상함	항상함	3	4	4	4	4	4	보통	해당사항 없음	없음	1	2	3	3	1	1	3	1	2
2020-10-09 16:48:20	남성	29	4학년	인물/예술계열	기독교	아니오	마시지 않는다	아니오(4번 문항으로)		예(4-1번 문항으로)	(만성)기관지염	아니오(6번 문항으로)		예(6-1번 문항으로)	건강검진	5	2	5	4	5	5	5	5	4	5	5	5	항상함	항상함	항상함	항상함	4	4	5	4	5	3	보통	해당사항 없음	없음	3	3	3	3	1	2	2	3	2
2020-10-09 17:32:44	남성	24-25세	3학년	IT엔지리어링	무교	아니오	주 1-2회	아니오(4번 문항으로)		아니오(5번 문항으로)		아니오(6번 문항으로)		아니오(7번 문항으로)		2	2	4	4	4	5	2	2	3	5	3	4	가끔함	항상함	항상함	항상함	4	4	4	4	4	4	양호	해당사항 없음	없음	2	2	3	3	2	2	2	3	3
2020-10-09 17:58:27	남성	28	4학년	사회과학계열	무교	아니오	주 3-4회	아니오(4번 문항으로)		아니오(5번 문항으로)		아니오(6번 문항으로)		아니오(7번 문항으로)		4	2	5	4	4	4	3	5	5	5	4	5	가끔함	항상함	가끔함	항상함	5	5	5	5	5	4	양호	해당사항 없음	없음	1	2	3	3	1	1	3	2	1
2020-10-09 20:18:47	여성	26-27세	4학년	사회과학계열	기독교	예	주 3-4회	아니오(4번 문항으로)		아니오(5번 문항으로)		아니오(6번 문항으로)		아니오(7번 문항으로)		5	2	4	5	5	5	4	5	5	5	2	4	항상함	항상함	항상함	가끔함	5	5	5	5	2	5	양호	해당사항 없음	없음	3	3	3	3	0	0	3	0	2
2020-10-09 20:34:36	여성	24-25세	4학년	사회과학계열	무교	예	주 3-4회	아니오(4번 문항으로)		예(4-1번 문항으로)	천식	아니오(6번 문항으로)		아니오(7번 문항으로)		4	4	4	5	4	5	3	5	4	3	5	3	항상함	항상함	항상함	항상함	1	1	1	1	3	4	양호	해당사항 없음	없음	0	3	3	3	0	0	3	0	0
2020-10-10 16:10:22	남성	24-25세	4학년	공과	무교	아니오	주 1-2회	아니오(4번 문항으로)		아니오(5번 문항으로)		아니오(6번 문항으로)		아니오(7번 문항으로)		4	2	5	3	5	4	3	4	5	5	3	4	가끔함	항상함	가끔함	항상함	4	5	4	4	4	4	보통	해당사항 없음	없음	0	3	3	3	1	1	3	1	1
2020-10-10 18:32:29	여성	22-23세	4학년	IT엔지리어링	무교	아니오	마시지 않는다	아니오(4번 문항으로)		예(4-1번 문항으로)	비염	아니오(6번 문항으로)		예(6-1번 문항으로)	감기	4	3	5	4	4	4	3	4	3	5	4	3	항상함	항상함	항상함	항상함	5	5	5	5	5	5	양호하지 않음	해당사항 없음	없음	2	1	3	3	1	1	3	0	2
2020-10-10 18:32:57	여성	22-23세	1학년	경영학과	무교	아니오	주 1-2회	아니오(4번 문항으로)		아니오(5번 문항으로)		아니오(6번 문항으로)		예(6-1번 문항으로)	감기	4	4	5	2	5	5	5	5	4	5	3	3	항상함	항상함	항상함	항상함	5	4	4	4	4	5	보통	해당사항 없음	증상경험 있음	1	2	3	1	2	1	2	2	2
2020-10-10 18:38:37	여성	22-23세	3학년	인물/예술계열	천주교	예	주 1-2회	예(3-1번 문항으로)	비염	아니오(5번 문항으로)		아니오(6번 문항으로)		예(6-1번 문항으로)	치과	3	2	4	3	4	5	3	5	5	5	4	4	항상함	항상함	항상함	항상함	3	3	3	3	3	5	보통	해당사항 없음	증상경험 있음	1	2	3	2	2	2	2	1	2
2020-10-10 18:45:58	남성	24-25세	3학년	사회과학계열	무교	예	주 3-4회	아니오(4번 문항으로)		아니오(5번 문항으로)		아니오(6번 문항으로)		아니오(7번 문항으로)		3	3	3	3	3	4	4	4	4	5	4	5	항상함	항상함	항상함	항상함	3	3	4	4	4	5	양호	격리 및 감시대상	없음	0	1	3	1	1	1	2	1	1
2020-10-10 22:15:09	남성	22-23세	2학년	IT엔지리어링	무교	아니오	주 1-2회	아니오(4번 문항으로)		아니오(5번 문항으로)		아니오(6번 문항으로)		아니오(7번 문항으로)		5	3	5	4	4	5	5	5	5	5	5	5	항상함	항상함	항상함	항상함	3	4	3	4	3	2	양호	해당사항 없음	없음	0	3	3	3	0	0	3	0	2
2020-10-10 22:35:11	남성	22-23세	2학년	전자제어공학	무교	아니오	주 1-2회	아니오(4번 문항으로)		아니오(5번 문항으로)		아니오(6번 문항으로)		아니오(7번 문항으로)		4	2	5	4	4	3	3	4	5	5	2	4	항상함	항상함	가끔함	가끔함	4	5	5	5	5	5	보통	해당사항 없음	없음	1	1	1	1	2	2	1	3	2
2020-10-10 22:35:15	남성	22-23세	2학년	전자제어공학	무교	아니오	주 1-2회	아니오(4번 문항으로)		아니오(5번 문항으로)		아니오(6번 문항으로)		아니오(7번 문항으로)		4	2	5	4	4	3	3	4	5	5	2	4	항상함	항상함	가끔함	가끔함	4	5	5	5	5	5	보통	해당사항 없음	없음	1	1	1	1	2	2	1	3	2
2020-10-10 22:45:03	남성	22-23세	2학년	공과	무교	아니오	주 1-2회	아니오(4번 문항으로)		아니오(5번 문항으로)		아니오(6번 문항으로)		아니오(7번 문항으로)		2	1	3	2	2	4	4	4	4	5	3	3	가끔함	항상함	항상함	가끔함	3	3	3	3	3	2	보통	해당사항 없음	없음	0	2	3	3	1	1	3	0	0
2020-10-11 00:37:00	여성	22-23세	4학년	IT엔지리어링	무교	아니오	주 1-2회	아니오(4번 문항으로)		아니오(5번 문항으로)		아니오(6번 문항으로)		아니오(7번 문항으로)		4	4	5	4	4	5	2	4	4	4	2	5	항상함	항상함	항상함	항상함	4	5	5	4	4	4	양호	해당사항 없음	없음	1	1	1	1	2	2	2	1	2
2020-10-11 19:23:04	여성	22-23세	3학년	간호학과	무교	아니오	주 1-2회	아니오(4번 문항으로)		아니오(5번 문항으로)		예(5-1번 문항으로)	A형간염/B형간염	아니오(7번 문항으로)		4	4	4	5	5	4	5	3	5	4	5	4	항상함	항상함	항상함	항상함	4	4	4	4	4	4	양호	해당사항 없음	없음	1	2	3	3	1	1	3	1	1
2020-10-12 16:53:18	여성	22-23세	3학년	인물/예술계열	천주교	예	주 1-2회	예(3-1번 문항으로)	비염	아니오(5번 문항으로)		아니오(6번 문항으로)		예(6-1번 문항으로)	치과	3	2	4	3	4	5	3	5	5	5	4	4	항상함	항상함	항상함	항상함	3	3	3	3	3	5	보통	해당사항 없음	증상경험 있음	1	2	3	2	2	2	2	1	2
2020-10-12 19:57:31	여성	20-21세	2학년	IT엔지리어링	무교	아니오	마시지 않는다	아니오(4번 문항으로)		아니오(5번 문항으로)		예(5-1번 문항으로)	독감주사	예(6-1번 문항으로)	예방접종	4	4	5	5	5	5	5	5	4	5	5	5	항상함	항상함	항상함	항상함	4	5	3	4	3	5	양호	해당사항 없음	없음	0	1	3	3	2	2	2	1	1
2020-10-12 19:58:49	남성	24-25세	4학년	간호학과를 제외한 보건/바이오 계열	무교	아니오	주 1-2회	아니오(4번 문항으로)		아니오(5번 문항으로)		아니오(6번 문항으로)		아니오(7번 문항으로)		3	4	4	4	4	3	3	4	4	3	4	3	항상함	항상함	항상함	항상함	2	4	2	4	4	4	양호	해당사항 없음	없음	0	2	2	3	1	1	2	2	1
2020-10-12 20:07:45	여성	22-23세	2학년	인물/예술계열	무교	아니오	주 1-2회	아니오(4번 문항으로)		아니오(5번 문항으로)		아니오(6번 문항으로)		아니오(7번 문항으로)		5	5	5	5	5	5	5	5	5	5	4	5	항상함	항상함	항상함	항상함	3	3	1	1	1	5	양호	해당사항 없음	없음	0	3	3	3	0	0	3	0	0
2020-10-12 20:09:36	여성	20-21세	1학년	사회과학계열	무교	아니오	마시지 않는다	아니오(4번 문항으로)		아니오(5번 문항으로)		예(5-1번 문항으로)	인플루엔자	예(6-1번 문항으로)	예방접종	4	2	5	3	4	5	4	4	5	5	4	4	항상함	항상함	항상함	항상함	4	4	5	5	4	4	양호	해당사항 없음	없음	2	3	3	3	2	2	3	1	1
2020-10-12 20:44:52	여성	22-23세	3학년	간호학과를 제외한 보건/바이오 계열	무교	예	주 3-4회	아니오(4번 문항으로)		아니오(5번 문항으로)		예(5-1번 문항으로)	A형간염/B형간염	아니오(7번 문항으로)		4	1	5	4	4	4	4	4	4	4	3	4	가끔함	항상함	가끔함	가끔함	4	3	5	4	4	4	양호하지 않음	해당사항 없음	없음	1	1	2	3	1	1	3	1	2
2020-10-12 20:48:04	남성	24-25세	4학년	사회과학계열	기독교	아니오	마시지 않는다	아니오(4번 문항으로)		아니오(5번 문항으로)		아니오(6번 문항으로)		예(6-1번 문항으로)	심혈관질환검사및치료	4	4	4	5	5	4	4	4	4	5	3	4	항상함	항상함	항상함	가끔함	4	2	4	4	4	5	양호하지 않음	해당사항 없음	없음	3	0	2	1	2	3	0	3	2
2020-10-12 20:48:43	여성	22-23세	3학년	사회과학계열	무교	아니오	주 1-2회	아니오(4번 문항으로)		아니오(5번 문항으로)		아니오(6번 문항으로)		아니오(7번 문항으로)		4	4	4	4	4	4	4	4	4	5	4	4	가끔함	항상함	항상함	가끔함	4	4	4	4	4	4	양호	해당사항 없음	없음	1	2	3	3	1	1	3	1	1
2020-10-12 20:56:41	여성	24-25세	1학년	인물/예술계열	불교	아니오	마시지 않는다	예(3-1번 문항으로)	저혈압	아니오(5번 문항으로)		아니오(6번 문항으로)		예(6-1번 문항으로)	기저질환치료	3	3	5	4	4	5	5	5	5	5	5	3	항상함	항상함	항상함	항상함	4	4	5	2	1	4	보통	해당사항 없음	없음	1	1	2	1	2	2	1	1	2
2020-10-12 20:58:50	여성	22-23세	1학년	간호학과를 제외한 보건/바이오 계열	무교	아니오	주 1-2회	아니오(4번 문항으로)		아니오(5번 문항으로)		아니오(6번 문항으로)		아니오(7번 문항으로)		5	2	5	3	4	5	5	3	4	5	3	5	가끔함	항상함	항상함	항상함	4	4	5	4	3	4	양호하지 않음	해당사항 없음	없음	2	0	1	1	2	3	1	2	2
2020-10-12 21:10:22	남성	22-23세	2학년	사회과학계열	무교	아니오	마시지 않는다	아니오(4번 문항으로)		아니오(5번 문항으로)		예(5-1번 문항으로)	인플루엔자	예(6-1번 문항으로)	예방접종	2	2	4	3	2	4	3	4	4	5	3	4	항상함	항상함	항상함	항상함	4	4	5	5	5	4	양호	해당사항 없음	없음	0	2	3	3	1	1	3	0	1
2020-10-12 21:29:41	여성	20-21세	1학년	간호학과	천주교	아니오	주 1-2회	아니오(4번 문항으로)		예(4-1번 문항으로)	비염	예(5-1번 문항으로)	인플루엔자	예(6-1번 문항으로)	코로나바이러스감염증-19 검사	5	4	5	5	5	5	2	3	5	5	3	5	항상함	항상함	항상함	항상함	5	5	5	5	5	4	양호	격리 및 감시대상	없음	2	1	3	2	1	1	1	1	1
2020-10-12 21:34:04	여성	22-23세	4학년	사회과학계열	무교	아니오	주 1-2회	아니오(4번 문항으로)		아니오(5번 문항으로)		아니오(6번 문항으로)		예(6-1번 문항으로)	피부과	4	4	5	3	3	4	4	4	4	5	4	4	항상함	항상함	항상함	항상함	4	4	4	3	3	2	보통	해당사항 없음	증상경험 있음	1	2	2	2	1	1	2	1	1
2020-10-12 21:39:09	여성	20-21세	2학년	간호학과를 제외한 보건/바이오 계열	무교	아니오	마시지 않는다	아니오(4번 문항으로)		아니오(5번 문항으로)		아니오(6번 문항으로)		아니오(7번 문항으로)		4	4	4	4	4	5	5	5	5	5	5	5	항상함	항상함	항상함	항상함	5	5	4	5	4	4	양호	해당사항 없음	없음	1	3	3	3	0	1	3	1	1
2020-10-12 21:40:18	여성	20-21세	2학년	사회과학계열	무교	아니오	마시지 않는다	아니오(4번 문항으로)		아니오(5번 문항으로)		예(5-1번 문항으로)	자궁경부암	아니오(7번 문항으로)		4	4	4	5	4	5	3	3	4	5	4	4	항상함	항상함	항상함	항상함	4	4	4	4	3	5	양호	해당사항 없음	없음	0	1	2	1	1	1	1	0	1
2020-10-12 21:53:45	여성	22-23세	3학년	사회과학계열	무교	아니오	주 1-2회	아니오(4번 문항으로)		아니오(5번 문항으로)		예(5-1번 문항으로)	인플루엔자	예(6-1번 문항으로)	눈 염증	4	2	5	4	4	4	3	4	5	5	5	4	가끔함	항상함	항상함	항상함	3	5	4	5	3	4	양호	해당사항 없음	없음	1	3	3	3	1	1	3	1	1
2020-10-12 22:06:11	여성	20-21세	1학년	사회과학계열	무교	아니오	주 1-2회	아니오(4번 문항으로)		아니오(5번 문항으로)		아니오(6번 문항으로)		아니오(7번 문항으로)		4	5	4	4	4	2	2	3	5	5	4	5	가끔함	가끔함	거의안함	가끔함	4	4	4	3	3	4	보통	해당사항 없음	없음	3	0	3	1	3	2	3	2	1
2020-10-12 22:28:53	남성	20-21세	2학년	인물/예술계열	무교	아니오	주 1-2회	아니오(4번 문항으로)		아니오(5번 문항으로)		아니오(6번 문항으로)		아니오(7번 문항으로)		3	4	4	4	3	5	5	5	2	5	3	4	항상함	항상함	항상함	가끔함	4	4	5	3	2	4	양호	해당사항 없음	없음	1	3	3	1	2	1	0	1	3
2020-10-12 22:36:25	남성	24-25세	4학년	사회과학계열	무교	아니오	마시지 않는다	아니오(4번 문항으로)		아니오(5번 문항으로)		아니오(6번 문항으로)		아니오(7번 문항으로)		5	3	3	3	5	5	4	5	5	5	5	5	항상함	항상함	항상함	항상함	3	2	2	3	3	3	양호	해당사항 없음	없음	0	3	3	3	0	0	3	2	0
2020-10-12 22:38:44	여성	22-23세	4학년	인물/예술계열	무교	아니오	마시지 않는다	아니오(4번 문항으로)		아니오(5번 문항으로)		아니오(6번 문항으로)		아니오(7번 문항으로)		5	4	4	4	4	4	4	4	5	5	4	3	항상함	항상함	항상함	항상함	4	4	4	4	4	4	양호하지 않음	해당사항 없음	증상경험 있음	2	1	2	0	3	2	1	2	1
2020-10-12 22:51:27	여성	20-21세	1학년	사회과학계열	천주교	아니오	주 1-2회	아니오(4번 문항으로)		아니오(5번 문항으로)		예(5-1번 문항으로)	인플루엔자	예(6-1번 문항으로)	임파선 부음	3	3	4	3	4	4	4	4	5	5	4	4	항상함	항상함	항상함	항상함	3	3	3	3	3	3	양호	해당사항 없음	없음	1	1	2	2	1	1	2	1	1
2020-10-12 22:52:17	여성	20-21세	3학년	인물/예술계열	무교	아니오	주 1-2회	아니오(4번 문항으로)		아니오(5번 문항으로)		아니오(6번 문항으로)		아니오(7번 문항으로)		4	1	5	4	4	5	4	3	5	5	3	4	항상함	항상함	항상함	항상함	5	5	5	5	5	4	양호	해당사항 없음	없음	2	1	3	3	2	3	3	2	1
2020-10-12 23:08:21	여성	22-23세	3학년	사회과학계열	기독교	아니오	마시지 않는다	아니오(4번 문항으로)		아니오(5번 문항으로)		예(5-1번 문항으로)	인플루엔자	아니오(7번 문항으로)		4	4	5	5	4	4	3	4	5	5	5	5	항상함	항상함	항상함	항상함	5	4	5	5	5	4	양호	해당사항 없음	없음	2	1	2	1	2	2	1	1	0
2020-10-12 23:38:35	여성	20-21세	2학년	간호학과를 제외한 보건/바이오 계열	기독교	아니오	주 1-2회	아니오(4번 문항으로)		아니오(5번 문항으로)		아니오(6번 문항으로)		아니오(7번 문항으로)		3	3	4	4	4	4	4	3	4	5	4	3	가끔함	항상함	가끔함	가끔함	3	3	3	4	4	3	보통	해당사항 없음	없음	1	1	3	3	1	1	3	1	2
2020-10-13 00:25:09	여성	20-21세	2학년	간호학과를 제외한 보건/바이오 계열	기독교	아니오	마시지 않는다	아니오(4번 문항으로)		아니오(5번 문항으로)		아니오(6번 문항으로)		아니오(7번 문항으로)		5	5	5	5	5	5	5	5	5	5	5	5	항상함	항상함	항상함	항상함	2	2	4	4	2	5	양호	해당사항 없음	없음	0	3	3	1	1	2	3	0	1
2020-10-13 01:34:43	남성	22-23세	2학년	사회과학계열	무교	예	마시지 않는다	아니오(4번 문항으로)		아니오(5번 문항으로)		아니오(6번 문항으로)		예(6-1번 문항으로)	발목염좌	4	3	5	3	4	5	3	4	5	5	3	5	가끔함	항상함	항상함	항상함	5	5	4	2	1	5	양호	해당사항 없음	없음	0	0	3	1	3	1	3	0	1
2020-10-13 01:39:22	여성	22-23세	3학년	간호학과를 제외한 보건/바이오 계열	기독교	아니오	주 1-2회	아니오(4번 문항으로)		아니오(5번 문항으로)		아니오(6번 문항으로)		아니오(7번 문항으로)		5	4	5	5	5	4	3	4	5	5	5	5	가끔함	항상함	항상함	항상함	3	4	4	2	2	5	양호	해당사항 없음	없음	2	1	3	1	2	1	1	2	0
2020-10-13 09:12:59	여성	20-21세	2학년	간호학과를 제외한 보건/바이오 계열	무교	아니오	마시지 않는다	아니오(4번 문항으로)		아니오(5번 문항으로)		아니오(6번 문항으로)		아니오(7번 문항으로)		5	4	4	4	4	5	5	5	4	5	4	5	항상함	항상함	항상함	항상함	5	5	4	5	5	4	양호	해당사항 없음	없음	1	1	1	1	1	2	1	0	1
2020-10-13 10:17:30	여성	24-25세	4학년	사회과학계열	무교	아니오	마시지 않는다	아니오(4번 문항으로)		아니오(5번 문항으로)		아니오(6번 문항으로)		예(6-1번 문항으로)	장염 위경련	4	3	4	5	5	4	4	4	5	5	3	3	항상함	항상함	항상함	항상함	3	3	5	3	3	3	보통	해당사항 없음	없음	1	1	2	2	2	2	2	1	2
2020-10-13 11:15:21	여성	22-23세	4학년	간호학과를 제외한 보건/바이오 계열	기독교	아니오	마시지 않는다	아니오(4번 문항으로)		아니오(5번 문항으로)		아니오(6번 문항으로)		아니오(7번 문항으로)		3	1	4	3	4	4	3	4	5	5	5	2	가끔함	가끔함	항상함	항상함	4	4	4	3	3	3	양호	해당사항 없음	없음	2	1	3	2	2	2	3	2	3
2020-10-13 11:15:31	여성	22-23세	4학년	간호학과를 제외한 보건/바이오 계열	기독교	아니오	마시지 않는다	아니오(4번 문항으로)		아니오(5번 문항으로)		아니오(6번 문항으로)		아니오(7번 문항으로)		3	1	4	3	4	4	3	4	5	5	5	2	가끔함	가끔함	항상함	항상함	4	4	4	3	3	3	양호	해당사항 없음	없음	2	1	3	2	2	2	3	2	3
2020-10-13 12:47:00	여성	22-23세	4학년	사회과학계열	무교	아니오	주 1-2회	아니오(4번 문항으로)		아니오(5번 문항으로)		아니오(6번 문항으로)		아니오(7번 문항으로)		5	4	5	4	4	5	5	5	5	5	4	5	항상함	항상함	항상함	항상함	4	5	5	5	3	5	양호	해당사항 없음	없음	0	3	3	3	1	0	3	0	0
2020-10-13 12:57:50	여성	22-23세	3학년	간호학과	무교	아니오	주 1-2회	아니오(4번 문항으로)		아니오(5번 문항으로)		예(5-1번 문항으로)	A형간염/B형간염	예(6-1번 문항으로)	예방접종	5	5	2	5	4	4	4	2	5	4	5	5	가끔함	항상함	항상함	항상함	4	5	4	4	4	4	보통	해당사항 없음	없음	0	3	2	3	1	0	3	2	0
2020-10-13 13:00:58	남성	24-25세	3학년	간호학과	기독교	아니오	주 1-2회	아니오(4번 문항으로)		아니오(5번 문항으로)		예(5-1번 문항으로)	A형간염/B형간염	아니오(7번 문항으로)		5	3	2	5	4	3	5	4	5	5	5	2	항상함	항상함	항상함	항상함	5	4	4	3	3	5	양호	해당사항 없음	없음	1	2	3	3	1	1	3	1	2
2020-10-13 13:03:08	여성	28	4학년	간호학과	무교	아니오	마시지 않는다	아니오(4번 문항으로)		아니오(5번 문항으로)		예(5-1번 문항으로)	파상풍-디프테리아	예(6-1번 문항으로)	식도염 위장질환 폐렴 코로나검사	2	5	5	5	5	5	5	2	5	5	5	4	가끔함	항상함	항상함	항상함	3	3	4	4	2	4	양호하지 않음	해당사항 없음	증상경험 있음	3	0	2	1	2	3	0	0	2
2020-10-13 13:04:12	남성	22-23세	3학년	간호학과	기독교	아니오	주 1-2회	아니오(4번 문항으로)		아니오(5번 문항으로)		예(5-1번 문항으로)	A형간염/B형간염	예(6-1번 문항으로)	예방접종	3	3	2	3	3	4	4	4	4	4	5	4	가끔함	항상함	항상함	가끔함	5	4	4	3	5	4	보통	해당사항 없음	없음	2	3	3	3	0	0	3	0	0
2020-10-13 13:12:03	남성	24-25세	3학년	간호학과	기독교	아니오	주 1-2회	아니오(4번 문항으로)		아니오(5번 문항으로)		예(5-1번 문항으로)	A형간염/B형간염	예(6-1번 문항으로)	예방접종	5	5	5	5	5	5	5	4	2	4	5	4	가끔함	항상함	항상함	항상함	5	4	3	3	4	5	양호	해당사항 없음	증상경험 있음	0	3	3	3	0	0	3	0	0
2020-10-13 13:18:58	여성	22-23세	3학년	간호학과	무교	아니오	마시지 않는다	아니오(4번 문항으로)		아니오(5번 문항으로)		아니오(6번 문항으로)		예(6-1번 문항으로)	정형외과	4	4	4	5	4	4	5	5	5	5	5	4	항상함	항상함	항상함	가끔함	4	4	4	4	5	4	보통	해당사항 없음	없음	1	2	2	3	1	1	3	1	2
2020-10-13 14:40:44	남성	24-25세	3학년	간호학과	무교	아니오	주 1-2회	아니오(4번 문항으로)		아니오(5번 문항으로)		아니오(6번 문항으로)		아니오(7번 문항으로)		4	4	2	3	4	4	4	3	4	3	5	3	항상함	항상함	가끔함	항상함	4	4	4	4	2	3	양호	해당사항 없음	없음	0	2	3	1	1	2	1	0	1
2020-10-13 14:47:52	남성	22-23세	2학년	사회과학계열	기독교	예	마시지 않는다	아니오(4번 문항으로)		아니오(5번 문항으로)		예(5-1번 문항으로)	파상풍-디프테리아	예(6-1번 문항으로)	상처봉합	3	1	1	3	1	5	5	5	5	5	5	5	항상함	항상함	항상함	항상함	3	5	5	5	2	5	양호	해당사항 없음	없음	3	1	3	3	2	3	3	1	2
2020-10-13 14:56:49	여성	22-23세	3학년	간호학과	기독교	아니오	주 1-2회	아니오(4번 문항으로)		아니오(5번 문항으로)		아니오(6번 문항으로)		아니오(7번 문항으로)		5	3	2	4	2	4	4	3	4	5	5	4	가끔함	가끔함	항상함	항상함	4	4	4	4	5	4	양호	해당사항 없음	없음	0	1	3	3	1	2	1	1	1
2020-10-13 15:10:11	남성	24-25세	3학년	간호학과	무교	예	주 1-2회	아니오(4번 문항으로)		아니오(5번 문항으로)		예(5-1번 문항으로)	파상풍-디프테리아	아니오(7번 문항으로)		5	5	3	3	5	5	4	3	5	5	5	4	항상함	항상함	항상함	항상함	4	4	4	4	5	4	양호	해당사항 없음	없음	0	1	3	2	1	1	1	1	1
2020-10-13 15:10:36	여성	22-23세	3학년	간호학과	무교	아니오	주 1-2회	아니오(4번 문항으로)		아니오(5번 문항으로)		아니오(6번 문항으로)		아니오(7번 문항으로)		3	5	4	5	5	5	5	4	5	5	5	4	항상함	항상함	항상함	항상함	3	4	4	4	4	4	보통	해당사항 없음	없음	1	2	2	3	1	1	3	1	1
2020-10-13 15:10:51	여성	22-23세	4학년	간호학과	무교	아니오	마시지 않는다	아니오(4번 문항으로)		아니오(5번 문항으로)		예(5-1번 문항으로)	인플루엔자	예(6-1번 문항으로)	예방접종	5	5	5	5	5	5	5	5	5	5	5	5	항상함	항상함	항상함	항상함	5	2	2	3	5	3	보통	해당사항 없음	없음	1	1	2	2	1	2	3	1	1
2020-10-13 15:17:21	여성	22-23세	4학년	간호학과	무교	아니오	주 3-4회	아니오(4번 문항으로)		아니오(5번 문항으로)		예(5-1번 문항으로)	인플루엔자	예(6-1번 문항으로)	치과	5	3	2	3	4	4	5	5	5	5	5	5	항상함	항상함	항상함	항상함	4	5	4	4	3	4	양호	해당사항 없음	증상경험 있음	0	3	3	3	1	1	3	2	0
2020-10-13 15:23:46	여성	22-23세	4학년	간호학과	천주교	아니오	주 1-2회	아니오(4번 문항으로)		아니오(5번 문항으로)		예(5-1번 문항으로)	인플루엔자	예(6-1번 문항으로)	예방접종	3	1	1	4	1	2	3	3	3	4	5	3	가끔함	항상함	항상함	항상함	4	4	4	4	3	3	양호	해당사항 없음	없음	0	3	3	3	0	0	3	0	0
2020-10-13 15:58:01	남성	26-27세	4학년	체육학과	무교	아니오	주 1-2회	아니오(4번 문항으로)		예(4-1번 문항으로)	천식	아니오(6번 문항으로)		아니오(7번 문항으로)		5	2	5	5	3	5	5	5	5	5	2	5	항상함	항상함	항상함	항상함	5	5	5	5	5	5	양호	해당사항 없음	없음	1	2	3	3	3	1	3	1	1
2020-10-13 17:19:08	여성	26-27세	4학년	간호학과	무교	아니오	주 1-2회	아니오(4번 문항으로)		아니오(5번 문항으로)		예(5-1번 문항으로)	인플루엔자	아니오(7번 문항으로)		4	4	2	5	4	5	5	3	5	5	5	3	항상함	항상함	항상함	항상함	5	3	3	3	4	5	양호	해당사항 없음	없음	0	1	3	2	1	1	3	0	1
2020-10-13 17:27:15	여성	22-23세	3학년	간호학과	천주교	아니오	주 1-2회	아니오(4번 문항으로)		아니오(5번 문항으로)		예(5-1번 문항으로)	A형간염/B형간염	아니오(7번 문항으로)		4	4	2	5	4	5	4	4	5	4	5	4	항상함	항상함	항상함	가끔함	4	5	5	4	5	4	양호	해당사항 없음	없음	1	1	2	1	3	2	1	2	2
2020-10-13 18:38:19	남성	20-21세	1학년	인문학과	무교	아니오	마시지 않는다	아니오(4번 문항으로)		아니오(5번 문항으로)		아니오(6번 문항으로)		아니오(7번 문항으로)		4	4	4	4	4	3	3	3	3	5	5	5	항상함	항상함	항상함	항상함	5	5	5	5	5	4	양호	해당사항 없음	없음	1	1	2	2	2	2	3	2	2
2020-10-13 19:16:24	여성	22-23세	3학년	간호학과	무교	아니오	주 3-4회	아니오(4번 문항으로)		아니오(5번 문항으로)		예(5-1번 문항으로)	A형간염/B형간염	예(6-1번 문항으로)	감기	5	5	3	3	4	5	5	4	5	5	5	4	항상함	항상함	항상함	항상함	5	4	3	5	4	4	양호	해당사항 없음	없음	0	3	2	3	2	2	3	1	2
2020-10-13 20:04:01	남성	24-25세	4학년	간호학과	기독교	아니오	마시지 않는다	아니오(4번 문항으로)		아니오(5번 문항으로)		아니오(6번 문항으로)		예(6-1번 문항으로)	기숙사 제출용 결핵 진단서	5	5	5	5	4	5	5	5	5	5	5	5	항상함	항상함	항상함	항상함	5	5	5	5	5	5	양호	해당사항 없음	없음	0	2	2	2	2	2	2	1	1
2020-10-13 22:19:54	여성	22-23세	4학년	사회과학계열	무교	아니오	마시지 않는다	아니오(4번 문항으로)		아니오(5번 문항으로)		예(5-1번 문항으로)	독감	예(6-1번 문항으로)	예방접종	5	2	3	4	4	4	5	5	5	5	5	4	가끔함	항상함	항상함	항상함	3	3	3	3	3	4	보통	해당사항 없음	없음	1	2	2	2	2	1	3	2	1
2020-10-14 09:17:24	여성	22-23세	3학년	IT엔지리어링	무교	아니오	주 1-2회	아니오(4번 문항으로)		아니오(5번 문항으로)		아니오(6번 문항으로)		예(6-1번 문항으로)	사랑니발치	4	4	5	5	4	3	3	4	4	5	4	4	가끔함	항상함	항상함	가끔함	3	3	3	3	3	4	보통	해당사항 없음	없음	1	1	2	2	1	2	2	1	2
2020-10-15 01:38:26	여성	20-21세	2학년	인물/예술계열	기독교	예	주 3-4회	아니오(4번 문항으로)		아니오(5번 문항으로)		예(5-1번 문항으로)	인플루엔자	예(6-1번 문항으로)	감기	4	5	5	3	4	5	4	5	5	5	5	4	가끔함	항상함	항상함	항상함	4	5	5	5	4	5	양호	해당사항 없음	없음	2	2	3	3	2	3	3	1	2
2020-10-15 15:43:01	여성	22-23세	3학년	인물/예술계열	천주교	예	주 1-2회	예(3-1번 문항으로)	비염	아니오(5번 문항으로)		아니오(6번 문항으로)		예(6-1번 문항으로)	치과	3	2	4	3	4	5	3	5	5	5	4	4	항상함	항상함	항상함	항상함	3	3	3	3	3	5	보통	해당사항 없음	증상경험 있음	1	2	3	2	2	2	2	1	2
2020-10-15 16:21:58	남성	22-23세	1학년	사회과학계열	기독교	예	마시지 않는다	아니오(4번 문항으로)		아니오(5번 문항으로)		예(5-1번 문항으로)	A형간염/B형간염	아니오(7번 문항으로)		1	1	1	1	3	5	5	5	4	5	2	5	항상함	항상함	항상함	항상함	4	4	4	4	4	5	양호	해당사항 없음	없음	0	3	3	3	0	0	3	0	0
2020-10-16 20:07:05	여성	22-23세	3학년	사회과학계열	기독교	아니오	주 1-2회	아니오(4번 문항으로)		아니오(5번 문항으로)		예(5-1번 문항으로)	인플루엔자	아니오(7번 문항으로)		4	3	5	4	4	4	4	5	3	5	4	5	항상함	항상함	항상함	항상함	3	3	4	4	2	5	보통	해당사항 없음	증상경험 있음	1	2	3	2	2	2	1	2	2
2020-10-17 12:28:14	여성	22-23세	4학년	간호학과	기독교	아니오	마시지 않는다	아니오(4번 문항으로)		예(4-1번 문항으로)	알레르기비염	예(5-1번 문항으로)	A형간염/B형간염	예(6-1번 문항으로)	신체검진	4	4	3	4	4	4	5	4	3	4	5	4	항상함	항상함	항상함	항상함	4	4	4	3	4	4	양호	해당사항 없음	없음	0	2	2	2	0	0	3	0	0
2020-10-17 19:37:07	여성	28	3학년	간호학과	무교	아니오	마시지 않는다	아니오(4번 문항으로)		예(4-1번 문항으로)	(만성)기관지염	예(5-1번 문항으로)	파상풍-디프테리아	예(6-1번 문항으로)	코로나바이러스감염증-19 검사	2	5	4	5	3	5	5	3	5	4	5	4	가끔함	항상함	가끔함	항상함	5	4	4	3	4	4	양호하지 않음	해당사항 없음	증상경험 있음	3	0	2	1	2	2	1	1	2
2020-10-17 19:49:27	여성	22-23세	3학년	간호학과	기독교	아니오	마시지 않는다	아니오(4번 문항으로)		아니오(5번 문항으로)		예(5-1번 문항으로)	b형간염,파상풍,디프테리아	예(6-1번 문항으로)	흉부 엑스레이	5	5	5	5	5	5	5	5	5	5	5	4	항상함	항상함	항상함	항상함	4	5	3	4	4	4	양호	해당사항 없음	없음	0	1	3	2	1	2	2	1	1
2020-10-17 19:51:40	여성	29	3학년	간호학과	불교	아니오	주 1-2회	아니오(4번 문항으로)		아니오(5번 문항으로)		예(5-1번 문항으로)	인플루엔자	아니오(7번 문항으로)		5	5	4	5	5	5	4	3	5	5	5	4	항상함	항상함	항상함	항상함	5	4	4	4	5	4	보통	해당사항 없음	없음	2	1	2	2	1	2	2	1	2
2020-10-17 20:00:45	여성	22-23세	3학년	간호학과	무교	아니오	주 1-2회	아니오(4번 문항으로)		아니오(5번 문항으로)		예(5-1번 문항으로)	A형간염/B형간염	예(6-1번 문항으로)	감기	3	4	5	5	4	4	5	4	2	4	5	3	가끔함	항상함	항상함	항상함	5	5	5	4	4	4	양호	해당사항 없음	없음	2	2	3	3	1	1	1	1	1
2020-10-17 21:15:01	여성	20-21세	3학년	간호학과	무교	아니오	마시지 않는다	아니오(4번 문항으로)		아니오(5번 문항으로)		예(5-1번 문항으로)	A형간염/B형간염	아니오(7번 문항으로)		5	5	5	5	5	5	5	5	5	5	5	5	항상함	항상함	항상함	항상함	4	4	2	1	5	2	보통	해당사항 없음	없음	2	0	0	0	3	3	0	3	3
2020-10-17 22:34:04	여성	22-23세	3학년	간호학과	무교	아니오	마시지 않는다	아니오(4번 문항으로)		아니오(5번 문항으로)		예(5-1번 문항으로)	가다실 9	예(6-1번 문항으로)	피부트러블	5	4	1	5	4	5	4	2	5	3	5	5	항상함	항상함	항상함	가끔함	5	5	5	5	4	4	보통	해당사항 없음	없음	1	1	3	3	0	0	3	1	1
2020-10-17 23:20:50	여성	22-23세	3학년	간호학과	무교	아니오	주 1-2회	아니오(4번 문항으로)		아니오(5번 문항으로)		예(5-1번 문항으로)	인플루엔자	예(6-1번 문항으로)	보건증 발급	5	4	1	5	5	3	4	4	5	5	5	3	항상함	항상함	항상함	항상함	4	4	4	4	3	4	양호	해당사항 없음	없음	0	3	3	3	0	0	3	1	1
2020-10-17 23:25:54	여성	24-25세	3학년	간호학과	불교	예	주 1-2회	아니오(4번 문항으로)		아니오(5번 문항으로)		아니오(6번 문항으로)		아니오(7번 문항으로)		4	4	2	4	4	3	4	3	5	4	5	4	가끔함	항상함	항상함	항상함	4	5	4	4	5	4	양호	격리 및 감시대상	없음	2	1	1	1	2	2	1	1	2
2020-10-30 18:10:30	여성	22-23세	4학년	간호학과	무교	아니오	주 1-2회	아니오(4번 문항으로)		아니오(5번 문항으로)		예(5-1번 문항으로)	인플루엔자	예(6-1번 문항으로)	예방접종	5	4	3	5	4	4	5	4	5	5	5	3	항상함	항상함	항상함	항상함	5	4	4	4	5	5	양호	해당사항 없음	없음	2	1	1	1	2	2	1	2	2
2020-10-30 18:13:06	여성	22-23세	4학년	간호학과	기독교	아니오	마시지 않는다	아니오(4번 문항으로)		아니오(5번 문항으로)		예(5-1번 문항으로)	A형간염/B형간염	예(6-1번 문항으로)	코로나바이러스감염증-19 검사	3	4	4	4	2	4	5	5	5	5	5	3	항상함	항상함	항상함	항상함	3	4	4	4	4	4	보통	해당사항 없음	1	2	3	1	1	2	1	2	1	1
[truncated: 9 more columns]

## Sheet: coding
간호/비간호	1. 귀하의 성별은 무엇입니까?	2. 귀하의 연령은 무엇입니까?	3. 귀하의 학년은 무엇입니까?	4. 귀하의 소속 학과 계열은 무엇입니까?	5. 귀하의 종교는 무엇입니까?	1. 귀하는 흡연을 하십니까?	2. 귀하의 일주일 음주량은 어떻게 되십니까?	3. 귀하는 만성질환을 가지고 있습니까?	3-1. 귀하가 가지고 계신 만성질환의 종류는 무엇입니까?	4. 귀하는 호흡기 질환을 가지고 있습니까?	4-1. 귀하가 가지고 계신 호흡기 질환의 종류는 무엇입니까?	5. 최근 1년 이내에 의료기관에서 1방접종을 하신 적이 있으십니까?	5-1. 최근 1년 이내에 의료기관에서 받은 1방접종의 종류는 무엇입니까?	6. 최근 3개월 이내에 의료기관을 이용하신 적이 있으십니까?	6-1. 최근 3개월 이내에 의료기관을 이용하신 목적은 무엇입니까?	1. 코로나바이러스감염증-19에 감염될까봐	2. 코로나바이러스감염증-19에 감염되면 질병이 중해져서 사망할까봐	3. 소아나 고령, 지병이 있는 가족이 코로나바이러스감염증-19에 감염될까봐	4. 전국적으로 코로나바이러스감염증-19가 유행하여 사회경제적 혼란이 올까봐	5. 전반적으로 코로나바이러스감염증-19 때문에	1. 비누나 세정제로 자주 손씻기	2. 씻지 않은 손으로 눈, 코, 입을 만지지 말기	3. 재채기나 기침시 휴지나 손수건으로 가리기	4. 발열, 호흡기 증상이 있는 타인과의 접촉을 피하기	5. 외출 시 마스크 착용하기	6. 사람들이 많이 모이는 장소를 피하기	7. 병문안 및 의료기관 방문을 자제하기	1. 식사하기 전 얼마나 자주 손을 씻었습니까?	2. 화장실 다녀온 후 얼마나 자주 손을 씻었습니까?	3. 외출 후 집에 돌아왔을 때 얼마나 자주 손을 씻었습니까?	4. 비누나 손 세정제를 얼마나 자주 사용하였습니까?	1. 정부의 코로나바이러스감염증-19 1방 지침과 홍보는 어떠하였습니까?	2. 대중매체를 통한 코로나바이러스감염증-19 발생 정보 전달은 어떠하였습니까?	3. 국내 의료기관의 코로나바이러스감염증-19 감염 대응 능력은 어떠하였습니까?	4. 코로나바이러스감염증-19 확산 방지 대책(격리조치 등)은 어떠하였습니까?	5. 전반적인 코로나바이러스감염증-19 유행에 대한 정부의 대응은 어떠하였습니까?	6. 코로나바이러스감염증-19 유행 기간 중 스트레스 인지	7. 코로나바이러스감염증-19 유행 기간 중 주관적건강수준	8. 코로나바이러스감염증-19 감염으로 인한 격리 및 능동감시경험 여부	9. 호흡기증상 경험 여부	1.현재 매우 편안하며 건강하다고 느낀다.	2.잠자고 난 후에도 개운한 감이 없다.	3.매우 피곤하고 지쳐 있어 먹는 것조차도 힘들다고 느껴진다.	4.근심 걱정 때문에 편안하게 잠을 자지 못한다.	5.정신이 맑고 깨끗하다고 느낀다.	6.기력(원기)이 왕성함을 느낀다.	7.밤이면 심란해지거나 불안해진다.	8.대다수의 사람들과 마찬가지로 나 자신을 잘 관리하고 있다고 생각한다.	9.전체적으로 현재 내가 하고 있는 일은 잘 되어가고 있다고 느낀다.
nursing/non-nursing	gender	age	grade	major	Religion	Smoking	Drinking	Chronic disease	Chronic disease name	Respiratory disease	Respiratory disease name	Vaccination within 12 months		Hospital visits within three months		Sensitivity to COVID-19 infection 1	Sensitivity to COVID-19 infection 2	Sensitivity to COVID-19 infection 3	Sensitivity to COVID-19 infection 4	Sensitivity to COVID-19 infection 5	Attitude toward preventive behaviors 1	Attitude toward preventive behaviors 2	Attitude toward preventive behaviors 3	Attitude toward preventive behaviors 4	Attitude toward preventive behaviors 5	Attitude toward preventive behaviors 6	Attitude toward preventive behaviors 7	Handwashing compliance 1	Handwashing compliance 2	Handwashing compliance 3	Handwashing compliance 4	Trust in policy 1	Trust in policy 2	Trust in policy 3	Trust in policy 4	Trust in policy 5	perceived stress	PHS during COVID-19	Stayed at home for COVID-19	Respiratory symptoms	Psychosocial problems 1	Psychosocial problems 2	Psychosocial problems 3	Psychosocial problems 4	Psychosocial problems 5	Psychosocial problems 6	Psychosocial problems 7	Psychosocial problems 8	Psychosocial problems 9
1	2	21	4	1	4	0	1	0		0		0		0		4	3	4	3	4	4	3	4	4	5	3	4	3	4	4	3	4	4	4	4	4	5	2	0	0	1	2	2	2	2	2	2	1	2
1	2	21	4	1	4	0	1	0		0		0		0		4	4	5	4	4	5	2	4	4	4	2	5	4	4	4	4	4	5	5	4	4	4	3	0	0	1	1	1	1	2	2	2	1	2
1	2	21	4	1	1	0	1	0		0		0		1		3	3	3	4	4	5	5	5	5	5	3	4	4	4	4	4	4	4	5	5	5	4	2	0	1	1	2	2	2	3	2	1	2	2
1	2	21	4	1	4	0	0	0		0		1	독감주사	1	1방접종	4	4	5	5	5	5	5	5	4	5	5	5	4	4	4	4	4	5	3	4	3	5	3	0	0	0	1	3	3	2	2	2	1	1
1	1	21	1	1	2	1	1	0		0		0		0		5	3	5	4	5	3	3	5	5	5	2	2	4	4	4	4	4	4	5	4	4	4	3	0	0	1	2	3	3	1	1	2	1	2
1	2	21	1	1	4	0	1	0		0		0		0		3	3	3	4	4	3	3	4	4	5	3	5	3	4	3	4	3	4	4	2	2	2	3	0	0	0	3	3	3	0	0	2	0	0
1	2	21	1	1	4	0	1	0		0		0		0		4	1	5	3	4	4	4	4	5	5	4	5	4	4	4	4	4	4	4	4	4	3	3	0	0	0	2	3	3	1	1	3	0	2
1	2	21	3	1	4	0	1	0		0		1	A형간염/B형간염	1	기저질환치료	5	4	4	5	5	4	4	3	5	5	5	5	3	4	3	4	4	3	3	3	4	4	3	0	0	0	3	3	3	0	0	3	1	1
1	2	21	4	1	4	0	1	0		0		0		0		2	2	4	4	4	5	2	2	3	5	3	4	3	4	4	4	4	4	4	4	4	4	3	0	0	2	2	3	3	2	2	2	3	3
1	2	21	4	1	4	0	1	0		0		0		1	사랑니발치	4	4	5	5	4	3	3	4	4	5	4	4	3	4	4	3	3	3	3	3	3	4	2	0	0	1	1	2	2	1	2	2	1	2
1	2	23	3	1	4	0	2	0		0		1	A형간염/B형간염	1	감기	5	5	3	3	4	5	5	4	5	5	5	4	4	4	4	4	5	4	3	5	4	4	3	0	0	0	3	2	3	2	2	3	1	2
1	2	23	4	1	4	0	2	0		0		1	인플루엔자	1	치과	5	3	2	3	4	4	5	5	5	5	5	5	4	4	4	4	4	5	4	4	3	4	3	0	1	0	3	3	3	1	1	3	2	0
1	2	23	3	1	4	0	1	0		0		1	A형간염/B형간염	0		5	5	5	5	4	5	4	5	5	5	5	5	4	4	4	4	5	5	5	4	3	5	3	0	0	0	3	3	3	0	0	3	0	0
1	2	23	4	1	4	1	1	0		0		1	A형간염/B형간염	1	B형간염 항체검사	5	4	2	5	3	4	4	4	2	5	5	5	3	4	4	4	5	4	3	3	4	4	3	0	0	0	1	2	3	2	3	3	1	1
1	2	23	4	1	4	1	1	0		0		0		1	B형간염 항체검사	5	4	2	4	4	4	5	5	5	5	5	4	4	4	4	4	5	4	3	3	4	4	3	0	0	1	0	2	1	1	1	3	1	0
1	2	23	4	1	4	1	1	0		0		0		1	B형간염 항체검사	5	3	2	4	4	4	5	5	5	5	5	4	4	4	4	4	4	4	3	3	4	4	3	0	0	1	1	2	3	1	2	3	1	1
1	2	23	3	1	1	0	0	0		0		1	MMR	1	흉부 X-ray 촬영(제출용)	4	4	2	4	4	4	4	3	4	5	5	4	3	4	4	3	1	5	4	4	3	4	3	0	0	1	3	3	3	1	1	3	0	1
1	2	23	3	1	4	0	0	0		0		0		0		5	5	5	5	5	5	5	5	5	5	5	5	4	4	4	4	4	5	2	2	4	4	3	0	0	0	3	3	3	2	1	2	0	1
1	2	23	4	1	4	0	0	0		0		1	A형간염/B형간염	0		5	4	2	5	4	4	5	4	4	5	5	4	4	4	4	4	5	4	4	4	3	5	3	0	0	1	3	3	3	0	0	3	1	1
1	2	24	4	1	4	0	0	0		0		0		0		3	4	5	3	3	3	5	5	5	5	5	5	4	4	4	4	4	4	4	4	1	5	3	0	0	0	3	3	3	1	3	3	0	0
1	1	25	3	1	4	1	1	0		0		1	A형간염/B형간염	1	피부과	4	4	3	4	4	4	4	4	4	5	4	3	4	4	4	4	4	4	4	4	5	4	3	0	0	1	1	2	2	2	1	1	1	1
1	1	25	3	1	4	0	0	0		1	천식	1	A형간염/B형간염	1	사랑니 제거	5	5	5	5	5	5	5	5	5	5	5	5	4	4	4	4	3	3	3	3	5	3	3	0	1	0	3	3	3	1	1	3	1	0
1	2	25	4	1	4	0	0	0		1	비염	0		1	감기	4	3	5	4	4	4	3	4	3	5	4	3	4	4	4	4	5	5	5	5	5	5	1	0	0	2	1	3	3	1	1	3	0	2
1	2	27	3	1	1	1	1	0		0		1	A형간염/B형간염	1	1방접종	4	5	5	5	5	5	4	4	5	5	5	4	4	4	4	4	5	5	4	3	5	5	2	0	0	2	0	2	2	3	3	2	2	2
1	2	28	4	1	4	0	1	0		0		0		0		5	3	5	4	4	5	5	5	5	5	5	5	4	4	4	4	3	4	3	4	3	2	3	0	0	0	3	3	3	0	0	3	0	2
1	2	28	3	1	1	0	0	0		0		1	A형간염/B형간염	1	X ray촬영	5	4	2	4	5	4	5	4	4	5	5	3	3	4	4	4	4	3	4	3	4	5	2	0	0	2	3	2	3	1	1	3	1	1
1	2	28	3	1	4	0	0	0		1	(만성)기관지염	1	파상풍-디프테리아	1	코로나바이러스감염증-19 검사	2	5	4	5	3	5	5	3	5	4	5	4	3	4	3	4	5	4	4	3	4	4	1	0	1	3	0	2	1	2	2	1	1	2
1	2	28	4	1	4	0	0	0		0		1	파상풍-디프테리아	1	식도염 위장질환 폐렴 코로나검사	2	5	5	5	5	5	5	2	5	5	5	4	3	4	4	4	3	3	4	4	2	4	1	0	1	3	0	2	1	2	3	0	0	2
1	2	29	3	1	3	0	1	0		0		1	인플루엔자	0		5	5	4	5	5	5	4	3	5	5	5	4	4	4	4	4	5	4	4	4	5	4	2	0	0	2	1	2	2	1	2	2	1	2
1	2	29	3	1	1	0	0	0		0		1	A형간염/B형간염	1	증명서 발급	4	3	5	5	5	5	4	4	5	5	3	5	3	4	4	4	5	4	4	4	3	4	2	0	0	1	3	2	3	0	1	3	0	0
1	2	30	3	1	3	0	1	0		0		1	인플루엔자	1	1방접종	5	5	4	5	5	5	5	4	5	4	5	3	4	4	4	4	5	4	4	4	5	4	2	0	0	1	1	2	2	0	2	2	1	2
1	2	20	1	1	2	0	1	0		1	비염	1	인플루엔자	1	코로나바이러스감염증-19 검사	5	4	5	5	5	5	2	3	5	5	3	5	4	4	4	4	5	5	5	5	5	4	3	1	0	2	1	3	2	1	1	1	1	1
1	2	20	2	1	1	0	1	0		0		1	인플루엔자	0		4	4	4	5	4	4	4	5	5	5	4	5	3	4	4	4	4	4	4	4	4	5	3	0	0	0	1	3	1	2	2	2	0	1
1	2	20	1	1	4	0	0	0		0		1	인플루엔자	0		5	5	5	5	5	5	5	5	5	5	5	5	3	4	4	4	5	5	5	5	5	1	3	0	0	0	3	3	3	0	0	3	0	0
1	2	20	1	1	4	0	0	0		0		1	자궁경부암	0		4	2	5	3	4	5	3	5	5	5	4	5	4	4	4	4	4	5	5	4	4	4	3	0	0	1	3	3	2	1	1	3	1	0
1	2	20	1	1	1	0	0	0		0		1	A형간염/B형간염	1	1방접종	4	2	4	4	4	5	5	5	5	5	5	4	4	4	4	4	4	3	4	3	3	4	3	0	0	0	1	3	3	1	2	2	1	1
1	2	20	1	1	2	0	0	0		0		0		0		4	2	5	4	4	4	5	5	4	5	4	5	4	4	4	3	3	3	3	4	4	3	3	0	0	0	3	3	3	1	1	3	0	1
1	2	20	1	1	4	0	0	0		0		0		1	감기	5	5	5	4	5	5	3	4	4	5	3	4	3	4	4	4	4	5	4	3	3	4	2	0	0	2	3	3	3	2	2	2	2	2
1	2	20	1	1	4	0	0	0		0		0		0		5	5	5	5	5	5	5	5	5	5	5	5	4	4	4	4	4	4	5	4	4	4	3	0	0	1	2	3	2	1	1	3	1	1
1	2	20	1	1	1	0	0	0		0		1	A형간염/B형간염	0		4	4	4	4	4	5	5	5	5	5	4	3	4	4	4	4	4	4	4	4	4	4	2	0	0	2	2	1	2	1	2	2	1	1
1	1	20	1	1	1	0	0	1	부비동염	1	축농증	0		0		5	5	5	5	5	5	5	5	5	5	5	5	4	4	4	4	5	5	3	4	2	5	3	0	0	1	1	3	3	1	0	3	0	1
1	2	20	1	1	4	0	0	0		0		1	독감	1	코로나바이러스감염증-19 검사	3	2	3	5	4	5	5	5	5	5	4	5	3	4	4	4	5	5	5	5	5	2	3	0	0	0	1	2	1	2	3	1	1	3
1	2	20	1	1	1	0	0	0		0		0		0		5	1	5	5	5	5	2	5	5	5	5	5	4	4	4	4	5	5	5	5	5	5	3	0	0	1	3	3	3	1	1	3	1	1
1	2	20	2	1	1	0	0	0		0		0		1	코로나바이러스감염증-19 검사	5	5	5	4	5	5	5	5	5	5	5	5	4	4	4	4	2	5	3	2	2	5	3	0	0	2	2	3	3	2	3	1	1	1
1	2	20	2	1	4	0	0	0		0		1	자궁경부암	1	감기	4	3	4	5	4	4	2	5	4	5	4	5	4	4	4	4	3	3	3	3	3	4	2	0	0	1	2	3	2	2	2	3	2	1
1	2	21	3	1	2	0	0	0		0		1	A형간염/B형간염	1	1방접종	5	4	4	5	4	4	5	5	5	5	5	5	4	4	4	4	4	4	4	3	3	4	3	0	0	1	3	3	3	0	1	3	0	0
1	2	21	3	1	4	0	0	0		0		1	A형간염/B형간염	0		5	3	2	4	3	4	4	2	5	5	5	5	4	4	4	4	5	4	4	3	3	5	3	0	0	0	1	3	3	2	2	3	1	1
1	2	21	3	1	4	0	0	0		0		1	A형간염/B형간염	0		5	4	3	4	5	5	4	4	5	5	5	4	4	4	4	3	3	2	3	2	4	4	3	0	0	2	1	3	1	2	2	2	3	3
1	2	21	3	1	4	0	0	0		0		1	A형간염/B형간염	0		5	5	5	5	5	5	5	5	5	5	5	5	4	4	4	4	4	4	2	1	5	2	2	0	0	2	0	0	0	3	3	0	3	3
1	1	23	2	1	4	0	1	0		1	(만성)기관지염	1	인플루엔자	1	1방접종	4	3	3	3	4	4	5	4	4	4	4	4	3	4	4	4	3	3	3	3	4	3	2	0	0	0	1	0	1	1	1	1	1	1
1	2	23	2	1	4	0	1	0		0		0		1	사랑니발치	4	4	5	5	4	3	3	4	4	5	4	4	3	4	4	3	3	3	3	3	3	4	2	0	0	1	1	2	2	1	2	2	1	2
1	2	23	3	1	4	0	1	0		0		1	A형간염/B형간염	1	역류성 식도염	4	3	5	4	4	5	3	5	5	5	3	2	4	4	4	4	4	4	4	4	4	5	3	0	0	1	2	3	3	1	1	2	1	3
1	2	23	3	1	2	0	1	0		0		0		0		4	2	4	5	5	4	4	5	5	5	3	4	4	4	4	4	4	3	4	4	4	5	3	0	0	1	1	3	0	2	3	0	1	2
1	2	23	3	1	4	0	1	0		0		1	A형간염/B형간염	0		5	3	5	5	5	5	4	5	5	5	5	5	4	4	4	3	5	5	4	3	4	5	3	0	0	2	2	1	0	2	2	1	2	2
1	2	23	3	1	4	0	1	0		0		1	A형간염/B형간염	0		5	2	5	5	5	4	3	5	3	5	5	5	4	4	4	3	3	2	5	5	3	5	3	0	0	0	3	3	3	1	1	2	3	1
1	2	23	3	1	4	0	1	0		0		1	A형간염/B형간염	1	1방접종	5	5	5	5	5	5	5	5	5	5	5	5	4	4	4	4	5	5	5	5	5	5	3	0	0	2	0	1	0	2	0	0	2	2
1	2	23	3	1	4	0	1	0		0		1	파상풍 디프테리아 a, b형간염	0		4	3	3	3	3	4	5	3	4	4	5	3	4	4	4	4	4	4	4	3	4	4	3	0	0	2	1	0	1	2	2	0	2	2
1	2	23	3	1	4	1	1	0		0		1	A형간염/B형간염	1	감기	2	3	2	2	4	3	3	5	5	5	5	4	4	4	4	4	3	3	3	3	3	3	2	0	0	0	3	3	2	2	2	2	1	1
1	2	23	3	1	2	0	1	0		0		1	A형간염/B형간염	0		5	4	4	5	4	5	5	5	5	5	5	5	4	4	4	4	4	4	4	4	5	4	2	0	0	1	2	2	2	1	1	3	1	1
1	2	23	3	1	4	0	1	0		0		1	A형간염/B형간염	0		5	5	5	5	4	5	4	5	4	5	5	5	4	4	4	3	4	4	4	4	3	4	3	0	0	1	3	1	2	0	0	3	1	2
1	2	23	3	1	1	0	1	0		1	(만성)기관지염	1	A형간염/B형간염	1	1방접종	5	4	1	4	4	3	5	5	5	5	5	4	4	4	4	4	5	5	5	5	3	4	3	0	0	2	1	3	1	3	3	1	2	2
1	2	23	3	1	2	0	1	0		0		1	A형간염/B형간염	1	1방접종	5	4	2	4	4	4	5	5	5	4	5	5	4	4	4	4	5	5	5	5	5	5	3	0	0	2	3	3	3	2	2	3	2	1
1	2	23	3	1	4	0	1	0		0		1	A형간염/B형간염	0		4	5	3	4	4	4	5	3	5	3	5	4	4	4	4	4	4	3	3	3	4	4	2	0	0	0	1	2	1	1	1	1	1	2
1	2	23	3	1	4	0	1	0		0		1	A형간염/B형간염	1	보건증	2	4	1	5	5	5	5	4	5	3	5	3	4	4	4	4	5	3	3	4	3	3	3	0	0	0	3	3	3	1	0	3	1	1
1	2	23	3	1	4	0	1	0		0		1	A형간염/B형간염	1	치과진료	2	4	1	5	3	4	5	4	2	5	5	2	4	4	4	4	2	2	2	2	3	2	3	0	0	0	3	1	3	2	2	3	2	1
1	2	23	3	1	4	0	1	0		0		1	A형간염/B형간염	1	기저질환치료	5	4	4	4	4	4	5	4	5	5	5	4	4	4	4	4	5	5	4	5	4	4	2	0	0	2	3	3	3	2	2	1	2	2
1	2	23	3	1	4	0	1	0		1	결핵	1	A형간염/B형간염	0		5	4	5	4	4	5	4	4	4	5	5	3	3	4	3	4	4	4	4	4	3	4	3	0	1	0	2	3	3	1	1	3	0	0
1	2	23	3	1	4	0	1	0		0		1	A형간염/B형간염	0		4	5	3	5	4	5	4	5	4	4	4	4	3	4	4	3	3	3	3	3	4	3	3	0	0	1	3	3	3	1	1	3	1	1
1	2	23	3	1	4	0	1	0		0		1	A형간염/B형간염	0		5	2	2	3	2	3	4	4	3	5	5	3	3	4	4	4	4	2	2	3	2	4	3	0	0	0	3	3	3	1	2	3	1	1
1	1	23	3	1	1	0	1	0		0		0		0		5	2	1	3	4	4	5	4	4	5	4	5	3	3	4	4	5	5	4	4	4	4	3	0	0	0	3	3	3	0	1	3	1	0
1	1	23	3	1	1	0	1	0		0		0	A형간염/B형간염	1	1방접종	4	3	3	3	3	2	4	5	5	5	4	5	3	3	3	1	5	4	5	4	5	5	1	0	0	3	2	1	1	2	3	2	1	2
1	2	23	3	1	4	0	1	0		0		1	A형간염/B형간염	1	1방접종	3	5	2	5	5	5	5	3	3	4	5	3	4	4	4	3	5	4	4	4	4	5	3	0	0	2	2	3	3	1	1	3	0	1
1	2	23	3	1	1	0	1	0		0		1	A형간염/B형간염	1	흉부 엑스레이	5	4	4	5	4	4	5	3	5	5	5	3	4	4	4	4	5	5	5	5	3	5	3	0	0	0	2	3	3	1	1	3	0	1
1	2	23	3	1	4	0	1	0		0		1	A형간염/B형간염	0		4	4	4	5	5	4	5	3	5	4	5	4	4	4	4	4	4	4	4	4	4	4	3	0	0	1	2	3	3	1	1	3	1	1
1	2	23	3	1	4	0	1	0		0		1	A형간염/B형간염	1	1방접종	5	5	2	5	4	4	4	2	5	4	5	5	3	4	4	4	4	5	4	4	4	4	2	0	0	0	3	2	3	1	0	3	2	0
1	1	23	3	1	1	0	1	0		0		1	A형간염/B형간염	1	1방접종	3	3	2	3	3	4	4	4	4	4	5	4	3	4	4	3	5	4	4	3	5	4	2	0	0	2	3	3	3	0	0	3	0	0
1	2	23	3	1	1	0	1	0		0		0		0		5	3	2	4	2	4	4	3	4	5	5	4	3	3	4	4	4	4	4	4	5	4	3	0	0	0	1	3	3	1	2	1	1	1
1	2	23	3	1	4	0	1	0		0		0		0		3	5	4	5	5	5	5	4	5	5	5	4	4	4	4	4	3	4	4	4	4	4	2	0	0	1	2	2	3	1	1	3	1	1
1	2	23	3	1	2	0	1	0		0		1	A형간염/B형간염	0		4	4	2	5	4	5	4	4	5	4	5	4	4	4	4	3	4	5	5	4	5	4	3	0	0	1	1	2	1	3	2	1	2	2
1	2	23	3	1	4	0	1	0		0		1	A형간염/B형간염	1	감기	3	4	5	5	4	4	5	4	2	4	5	3	3	4	4	4	5	5	5	4	4	4	3	0	0	2	2	3	3	1	1	1	1	1
1	2	23	3	1	4	0	1	0		0		1	인플루엔자	1	보건증 발급	5	4	1	5	5	3	4	4	5	5	5	3	4	4	4	4	4	4	4	4	3	4	3	0	0	0	3	3	3	0	0	3	1	1
1	2	23	4	1	4	0	1	0		0		1	A형간염/B형간염	0		4	4	5	5	5	4	3	5	5	5	5	5	3	4	3	3	4	5	5	3	4	4	2	0	0	2	3	3	3	1	1	3	1	0
1	2	23	4	1	4	1	1	0		0		0		1	B형간염 항체검사	5	4	2	4	4	4	5	5	5	5	5	4	4	4	4	4	5	5	4	4	4	4	3	0	0	1	0	1	1	3	2	3	2	1
1	2	23	4	1	2	0	1	0		0		1	인플루엔자	1	1방접종	3	1	1	4	1	2	3	3	3	4	5	3	3	4	4	4	4	4	4	4	3	3	3	0	0	0	3	3	3	0	0	3	0	0
1	2	23	4	1	4	0	1	0		0		1	인플루엔자	1	1방접종	5	4	3	5	4	4	5	4	5	5	5	3	4	4	4	4	5	4	4	4	5	5	3	0	0	2	1	1	1	2	2	1	2	2
1	1	23	2	1	1	0	0	0		0		1	파상풍-디프테리아	0		3	2	4	3	4	5	4	4	4	4	4	5	4	4	4	4	4	4	4	4	4	2	3	0	0	0	1	3	3	1	0	3	1	1
1	1	23	2	1	4	0	0	0		1	(만성)기관지염	1	신증후군출혈열	1	건강검진	3	4	4	4	5	5	5	5	4	4	3	3	3	4	3	4	4	5	4	4	5	3	2	0	0	1	3	3	1	2	1	1	2	2
1	2	23	3	1	4	0	0	0		0		1	인플루엔자	1	사마귀 치료	4	2	2	2	4	5	4	5	3	5	3	5	4	4	4	4	4	4	4	4	4	5	3	0	0	1	0	2	2	2	2	2	2	3
1	2	23	3	1	4	0	0	0		0		1	A형간염/B형간염	1	흉부엑스레이	4	5	5	5	5	5	5	5	5	5	5	5	4	4	4	4	5	4	4	2	5	4	3	0	0	1	1	1	2	3	2	0	1	2
1	2	23	3	1	4	0	0	0		0		1	인플루엔자	0		5	4	4	5	4	4	5	4	5	5	5	4	3	4	4	4	5	4	5	4	3	5	3	0	0	1	3	3	3	0	0	3	1	1
1	2	23	3	1	1	0	0	0		0		1	A형간염/B형간염	0		4	2	3	4	4	4	5	3	5	4	5	4	3	4	4	4	5	5	5	5	2	5	3	0	0	0	3	3	3	1	1	3	0	1
1	2	23	3	1	4	0	0	0		0		1	A형간염/B형간염	0		2	4	4	5	3	4	4	3	5	5	5	4	4	4	4	4	3	2	4	3	4	4	3	0	0	1	3	3	3	2	2	3	1	1
1	2	23	3	1	2	0	0	0		0		1	가다실9	1	1방접종	4	4	4	5	5	4	5	5	1	5	5	5	4	4	4	4	4	5	4	4	2	4	3	0	0	0	3	3	3	0	0	3	2	0
1	2	23	3	1	4	0	0	0		0		1	a형간염 홍역	1	배아파서	3	4	3	5	3	4	5	3	5	5	4	3	4	4	4	4	3	5	3	2	5	3	2	0	0	2	0	2	1	2	3	1	2	2
1	2	23	3	1	1	0	0	0		0		1	파상풍-디프테리아	0		5	5	5	5	5	5	4	3	2	5	5	5	4	4	4	4	5	5	5	5	5	5	3	0	0	0	1	3	3	0	0	3	1	2
1	2	23	3	1	4	0	0	0		0		1	A형간염/B형간염	1	기저질환치료	5	4	3	4	4	4	4	3	4	4	5	4	3	4	4	4	4	4	4	4	3	4	3	0	0	1	2	2	3	1	1	3	1	1
1	2	23	3	1	4	0	0	0		0		0		0		5	5	5	4	3	4	4	4	5	5	5	5	3	3	3	4	4	5	5	5	4	4	2	0	0	1	3	3	3	1	2	1	0	1
1	2	23	3	1	2	1	0	0		0		1	A형간염/B형간염	0		5	5	4	5	5	5	4	3	5	5	5	5	3	4	3	3	2	2	2	2	5	2	1	0	0	1	3	2	3	1	1	3	1	1
1	2	23	3	1	3	0	0	0		0		1	파상풍-디프테리아	1	감기	5	5	4	5	5	5	5	5	5	5	5	5	4	4	4	4	4	5	4	5	5	4	2	0	0	2	2	2	3	2	2	2	1	1
1	2	23	3	1	1	0	0	0		0		1	A형간염/B형간염	1	감기	4	4	4	4	4	4	4	4	4	4	4	5	3	4	4	4	3	3	3	3	4	3	3	0	0	1	2	1	1	1	1	1	1	1
1	2	23	3	1	4	0	0	0		0		1	A형간염/B형간염	1	1방접종	5	5	4	5	5	5	5	5	5	5	5	5	4	4	4	4	5	2	2	2	5	4	2	0	0	2	0	0	1	3	2	0	2	3
1	2	23	3	1	1	0	0	0		0		1	A형간염/B형간염	0		4	4	3	4	4	4	5	3	3	3	5	3	3	4	4	4	4	4	3	4	4	4	3	0	0	0	3	3	2	0	1	2	0	0
1	2	23	3	1	4	0	0	0		0		1	디프테리아, A형 간염, 수두	0		5	5	5	5	4	5	5	4	5	5	5	5	4	4	4	4	4	5	5	5	4	5	3	0	0	0	1	3	3	0	0	3	0	0
1	2	23	3	1	2	0	0	0		0		1	A형간염/B형간염	0		5	4	3	5	4	4	5	4	5	5	5	5	4	4	4	4	3	3	4	4	3	3	3	0	0	0	3	3	2	0	1	2	1	1
1	2	23	3	1	2	0	0	0		0		1	A형간염/B형간염	1	감기	5	4	3	3	4	5	4	2	4	4	5	5	2	4	4	4	5	3	3	2	5	4	3	0	0	1	2	3	3	2	2	3	1	1
1	2	23	3	1	4	0	0	0		0		1	가다실9	1	2드름 치료	3	5	2	5	4	5	4	2	5	5	5	3	2	4	4	4	4	5	5	5	4	4	1	0	0	2	1	3	3	1	1	3	2	2
1	2	23	3	1	4	0	0	0		0		0		1	정형외과	4	4	4	5	4	4	5	5	5	5	5	4	4	4	4	3	4	4	4	4	5	4	2	0	0	1	2	2	3	1	1	3	1	2
1	2	23	3	1	1	0	0	0		0		1	b형간염,파상풍,디프테리아	1	흉부 엑스레이	5	5	5	5	5	5	5	5	5	5	5	4	4	4	4	4	4	5	3	4	4	4	3	0	0	0	1	3	2	1	2	2	1	1
1	2	23	3	1	4	0	0	0		0		1	가다실 9	1	피부트러블	5	4	1	5	4	5	4	2	5	3	5	5	4	4	4	3	5	5	5	5	4	4	2	0	0	1	1	3	3	0	0	3	1	1
1	2	23	4	1	4	0	0	0		0		1	인플루엔자	1	감기	5	4	5	5	5	5	5	5	5	5	5	5	4	4	4	4	4	4	3	2	3	5	3	0	0	2	1	1	2	2	2	3	1	1
1	2	23	4	1	4	0	0	0		0		1	A형간염/B형간염	0		5	4	5	5	5	5	3	5	5	5	5	5	4	4	4	4	2	4	1	1	1	3	3	0	0	0	0	2	1	2	2	3	0	2
1	2	23	4	1	1	0	0	0		0		1	인플루엔자	0		5	5	5	5	5	5	3	5	4	5	4	4	3	4	4	4	4	4	4	4	4	4	3	0	0	3	1	2	2	1	2	3	1	0
1	2	23	4	1	1	0	0	0		0		1	인플루엔자	0		5	5	5	4	4	5	5	5	5	5	5	5	3	4	4	4	2	2	2	2	2	5	2	1	1	1	1	1	0	2	2	1	2	2
1	2	23	4	1	4	0	0	0		0		1	인플루엔자	1	1방접종	5	5	5	5	5	5	5	5	5	5	5	5	4	4	4	4	5	2	2	3	5	3	2	0	0	1	1	2	2	1	2	3	1	1
1	2	23	4	1	1	0	0	0		1	알레르기비염	1	A형간염/B형간염	1	신체검진	4	4	3	4	4	4	5	4	3	4	5	4	4	4	4	4	4	4	4	3	4	4	3	0	0	0	2	2	2	0	0	3	0	0
1	2	23	4	1	1	0	0	0		0		1	A형간염/B형간염	1	코로나바이러스감염증-19 검사	3	4	4	4	2	4	5	5	5	5	5	3	4	4	4	4	3	4	4	4	4	4	2	0	1	2	3	1	1	2	1	2	1	1
1	2	25	3	1	3	1	1	0		0		1	A형간염/B형간염	1	기저질환치료	3	3	2	5	5	3	5	4	4	5	5	3	4	4	4	4	5	4	3	3	4	4	3	0	0	1	3	3	1	1	1	2	1	1
1	1	25	3	1	4	0	1	0		0		1	A형간염/B형간염	1	장염	5	4	4	5	4	5	3	2	4	4	5	3	3	4	3	4	4	4	5	3	5	4	2	0	0	1	1	3	2	2	2	3	1	1
1	1	25	3	1	1	0	1	0		0		1	A형간염/B형간염	0		5	3	2	5	4	3	5	4	5	5	5	2	4	4	4	4	5	4	4	3	3	5	3	0	0	1	2	3	3	1	1	3	1	2
1	1	25	3	1	1	0	1	0		0		1	A형간염/B형간염	1	1방접종	5	5	5	5	5	5	5	4	2	4	5	4	3	4	4	4	5	4	3	3	4	5	3	0	1	0	3	3	3	0	0	3	0	0
1	1	25	3	1	4	0	1	0		0		0		0		4	4	2	3	4	4	4	3	4	3	5	3	4	4	3	4	4	4	4	4	2	3	3	0	0	0	2	3	1	1	2	1	0	1
1	1	25	3	1	4	1	1	0		0		1	파상풍-디프테리아	0		5	5	3	3	5	5	4	3	5	5	5	4	4	4	4	4	4	4	4	4	5	4	3	0	0	0	1	3	2	1	1	1	1	1
1	2	25	3	1	3	1	1	0		0		0		0		4	4	2	4	4	3	4	3	5	4	5	4	3	4	4	4	4	5	4	4	5	4	3	1	0	2	1	1	1	2	2	1	1	2
1	2	25	4	1	3	0	1	0		0		0		0		3	2	4	5	3	2	2	5	4	5	2	3	3	4	4	3	2	2	2	2	2	4	3	0	0	2	3	3	3	0	1	2	2	2
1	2	25	3	1	3	1	0	0		0		1	A형간염/B형간염	0		4	2	4	3	4	5	3	5	5	5	3	3	4	4	4	4	3	3	4	3	3	5	3	0	0	0	2	3	2	1	1	2	0	1
1	2	25	3	1	4	0	0	0		0		1	A형간염/B형간염	1	1방접종	4	3	3	5	5	4	5	5	5	3	5	3	4	4	4	4	3	3	3	3	4	3	3	0	0	0	1	3	2	2	2	2	2	1
1	1	25	3	1	4	0	0	0		0		1	A형간염/B형간염	1	1방접종	4	2	1	1	5	2	5	5	5	5	5	3	4	4	4	4	5	1	2	2	3	5	2	0	0	1	2	2	3	0	0	3	1	1
1	2	25	4	1	1	0	0	0		0		1	A형간염/B형간염	1	코로나바이러스감염증-19 검사	5	4	5	2	4	5	5	4	5	5	5	4	4	4	4	4	4	4	4	4	4	3	2	0	0	2	2	2	2	2	2	1	3	1
1	1	25	4	1	1	0	0	0		0		0		1	기숙사 제출용 결핵 진단서	5	5	5	5	4	5	5	5	5	5	5	5	4	4	4	4	5	5	5	5	5	5	3	0	0	0	2	2	2	2	2	2	1	1
1	2	27	3	1	4	0	1	0		0		1	인플루엔자	0		4	1	5	5	4	5	4	5	5	5	5	4	4	4	4	4	4	5	4	4	4	3	3	0	0	1	2	3	3	0	0	3	0	0
1	2	27	3	1	4	0	1	0		0		1	A형간염/B형간염	1	1방접종	4	3	4	4	3	5	4	4	5	5	3	3	4	4	4	4	4	4	4	5	4	5	3	0	0	1	2	3	3	1	1	3	1	0
1	2	27	4	1	1	1	1	0		0		1	A형간염/B형간염	1	1방접종	5	5	5	5	5	4	3	5	5	5	3	3	4	4	4	3	5	5	5	5	3	5	2	0	0	1	0	3	2	2	2	1	2	2
1	2	27	4	1	4	0	1	0		0		1	인플루엔자	0		4	4	2	5	4	5	5	3	5	5	5	3	4	4	4	4	5	3	3	3	4	5	3	0	0	0	1	3	2	1	1	3	0	1
2	2	21	4	2	4	0	0	0		0		0		1	감기	5	5	5	4	5	5	3	4	4	5	3	4	3	4	4	4	4	5	4	3	3	4	2	0	0	2	3	3	3	2	2	2	2	2
2	2	21	2	4	1	1	2	0		0		0		0		5	2	4	5	5	5	4	5	5	5	2	4	4	4	4	3	5	5	5	5	2	5	3	0	0	3	3	3	3	0	0	3	0	2
2	2	21	3	4	1	0	0	0		0		0		1	심혈관질환검사및치료	4	4	4	5	5	4	4	4	4	5	3	4	4	4	4	3	4	2	4	4	4	5	1	0	0	3	0	2	1	2	3	0	3	2
2	2	21	3	4	1	0	0	0		0		1	인플루엔자	0		4	4	5	5	4	4	3	4	5	5	5	5	4	4	4	4	5	4	5	5	5	4	3	0	0	2	1	2	1	2	2	1	1	0
2	2	21	1	2	4	0	1	0		1	천식	0		0		5	2	5	5	3	5	5	5	5	5	2	5	4	4	4	4	5	5	5	5	5	5	3	0	0	1	2	3	3	3	1	3	1	1
2	2	21	2	4	4	0	1	0		0		1	인플루엔자	1	눈 염증	4	2	5	4	4	4	3	4	5	5	5	4	3	4	4	4	3	5	4	5	3	4	3	0	0	1	3	3	3	1	1	3	1	1
2	2	21	4	1	4	0	1	0		0		0		0		4	2	5	4	4	3	3	4	5	5	2	4	4	4	3	3	4	5	5	5	5	5	2	0	0	1	1	1	1	2	2	1	3	2
2	2	21	4	5	4	0	1	0		1	비염	0		1	항체주사 맞기 위함	5	3	4	5	5	4	2	5	5	5	4	3	3	4	4	4	4	3	5	2	3	4	2	0	0	2	2	3	3	2	2	1	0	2
2	2	21	2	4	4	0	0	0		0		1	인플루엔자	1	1방접종	4	2	5	3	4	5	4	4	5	5	4	4	4	4	4	4	4	4	5	5	4	4	3	0	0	2	3	3	3	2	2	3	1	1
2	2	21	2	4	4	1	0	0		0		0		1	발목염좌	4	3	5	3	4	5	3	4	5	5	3	5	3	4	4	4	5	5	4	2	1	5	3	0	0	0	0	3	1	3	1	3	0	1
2	2	21	3	4	4	0	0	0		0		1	자궁경부암	0		4	4	4	5	4	5	3	3	4	5	4	4	4	4	4	4	4	4	4	4	3	5	3	0	0	0	1	2	1	1	1	1	0	1
2	2	21	3	4	4	0	0	0		0		0		1	장염 위경련	4	3	4	5	5	4	4	4	5	5	3	3	4	4	4	4	3	3	5	3	3	3	2	0	0	1	1	2	2	2	2	2	1	2
2	2	21	3	5	3	0	0	1	저혈압	0		0		1	기저질환치료	3	3	5	4	4	5	5	5	5	5	5	3	4	4	4	4	4	4	5	2	1	4	2	0	0	1	1	2	1	2	2	1	1	2
2	2	21	4	4	4	0	0	0		0		1	인플루엔자	0		4	1	5	4	3	5	1	4	4	5	2	5	2	4	4	2	3	1	3	5	4	5	2	1	0	0	3	3	3	0	1	1	1	1
2	2	21	4	4	4	0	0	0		0		1	인플루엔자	1	1방접종	2	2	4	3	2	4	3	4	4	5	3	4	4	4	4	4	4	4	5	5	5	4	3	0	0	0	2	3	3	1	1	3	0	1
2	1	21	1	4	4	0	1	0		0		0		0		4	5	4	4	4	2	2	3	5	5	4	5	3	3	2	3	4	4	4	3	3	4	2	0	0	3	0	3	1	3	2	3	2	1
2	2	21	2	5	4	0	1	0		0		0		0		3	4	4	4	3	5	5	5	2	5	3	4	4	4	4	3	4	4	5	3	2	4	3	0	0	1	3	3	1	2	1	0	1	3
2	2	21	3	4	4	1	1	0		0		0		1	산부인과	2	4	4	4	4	4	5	5	5	5	3	3	4	4	4	4	3	4	4	4	4	4	3	0	0	1	3	3	3	0	0	3	1	1
2	1	21	4	4	4	0	1	0		0		0		0		5	4	5	4	4	5	5	5	5	5	4	5	4	4	4	4	4	5	5	5	3	5	3	0	0	0	3	3	3	1	0	3	0	0
2	2	21	4	4	1	0	1	0		0		1	인플루엔자	0		4	3	5	4	4	4	4	5	3	5	4	5	4	4	4	4	3	3	4	4	2	5	2	0	1	1	2	3	2	2	2	1	2	2
2	2	21	4	5	2	1	1	1	비염	0		0		1	치과	3	2	4	3	4	5	3	5	5	5	4	4	4	4	4	4	3	3	3	3	3	5	2	0	1	1	2	3	2	2	2	2	1	2
2	1	21	2	4	4	0	0	0		0		0		0		5	3	3	3	5	5	4	5	5	5	5	5	4	4	4	4	3	2	2	3	3	3	3	0	0	0	3	3	3	0	0	3	2	0
2	2	21	2	4	1	1	0	0		0		1	A형간염/B형간염	0		1	1	1	1	3	5	5	5	4	5	2	5	4	4	4	4	4	4	4	4	4	5	3	0	0	0	3	3	3	0	0	3	0	0
2	2	21	3	1	4	1	0	0		0		1	A형간염/B형간염	0		3	3	4	5	4	3	4	3	5	5	5	4	4	4	4	4	5	5	5	5	5	5	3	0	0	3	3	3	2	2	2	3	3	3
2	2	21	3	3	1	0	0	1	빈혈, 비염	1	만성비염	0		1	기저질환치료	4	5	4	5	5	5	5	3	4	5	4	4	4	4	4	4	5	5	5	5	5	5	3	0	0	1	2	3	3	2	2	3	1	2
2	2	21	4	5	1	0	0	0		0		0		0		5	5	5	5	5	5	4	5	5	5	4	5	3	4	4	4	4	4	4	4	4	4	3	0	0	1	2	3	1	1	1	2	1	2
2	1	21	1	5	4	1	4	0		0		0		1	기저질환치료	4	1	3	5	5	4	2	4	3	4	4	3	4	4	4	4	5	5	5	5	5	5	2	0	1	2	2	2	2	2	2	2	2	2
2	2	21	2	5	4	1	4	0		0		0		1	기저질환치료	4	1	3	5	5	4	2	4	3	4	4	3	4	4	4	4	5	5	5	5	5	5	2	0	1	2	2	2	2	2	2	2	2	2
2	2	21	2	4	4	1	2	0		0		0		0		3	3	3	3	3	4	4	4	4	5	4	5	4	4	4	4	3	3	4	4	4	5	3	1	0	0	1	3	1	1	1	2	1	1
2	2	21	2	5	1	1	2	0		0		1	인플루엔자	1	감기	4	5	5	3	4	5	4	5	5	5	5	4	3	4	4	4	4	5	5	5	4	5	3	0	0	2	2	3	3	2	3	3	1	2
2	2	21	2	5	1	1	2	0		0		1	인플루엔자	1	감기	4	5	5	3	4	5	4	5	5	5	5	4	3	4	4	4	4	5	5	5	4	5	3	0	0	2	2	3	3	2	3	3	1	2
2	2	21	4	4	4	1	2	0		1	천식	0		0		4	4	4	5	4	5	3	5	4	3	5	3	4	4	4	4	1	1	1	1	3	4	3	0	0	0	3	3	3	0	0	3	0	0
2	2	21	2	4	4	0	1	0		0		0		1	보건증 발급	5	5	5	5	5	5	4	5	5	5	4	5	3	4	4	3	5	5	5	5	5	4	3	0	0	3	3	3	3	0	1	1	1	1
2	2	21	3	4	4	0	1	0		0		0		0		4	3	5	5	4	5	3	5	4	5	4	5	4	4	4	4	4	4	4	4	5	4	3	0	0	0	2	3	2	1	1	2	1	2
2	2	21	4	4	4	0	1	0		1	비염, 축농증	0		1	감기	4	3	5	4	4	4	4	4	3	5	3	4	3	4	4	4	5	2	4	5	5	5	2	0	1	0	3	3	1	1	2	3	1	2
2	2	21	4	5	4	1	1	0		0		0		1	부상	3	1	5	5	3	5	3	5	4	5	3	5	4	4	4	4	5	5	5	5	5	3	2	0	0	2	0	1	2	3	3	3	3	3
2	2	21	2	5	4	0	0	0		0		0		0		3	5	5	5	5	5	3	3	4	5	4	3	4	4	4	4	3	4	4	4	3	4	3	0	0	0	3	3	3	0	0	3	0	1
2	2	21	2	5	2	0	0	0		1	(만성)기관지염	0		1	잠복결핵검사	4	5	5	3	4	5	2	5	5	5	3	4	4	4	4	4	5	5	5	4	3	5	3	0	0	3	1	3	3	3	2	3	3	2
2	2	21	4	4	1	1	0	0		0		1	파상풍-디프테리아	1	상처봉합	3	1	1	3	1	5	5	5	5	5	5	5	4	4	4	4	3	5	5	5	2	5	3	0	0	3	1	3	3	2	3	3	1	2
2	2	21	4	4	4	0	0	0		0		0		0		4	4	4	4	4	3	3	3	3	5	5	5	4	4	4	4	5	5	5	5	5	4	3	0	0	1	1	2	2	2	2	3	2	2
2	2	21	4	5	4	0	0	0		0		0		0		5	4	4	4	4	4	4	4	5	5	4	3	4	4	4	4	4	4	4	4	4	4	1	0	1	2	1	2	0	3	2	1	2	1
2	2	21	4	5	4	0	0	0		0		1		0		4	2	5	4	3	4	3	3	4	4	4	4	2	4	3	3	3	3	3	3	3	3	1	0	0	1	2	2	2	1	2	1	2	2
2	2	21	4	2	4	0	0	0		0		1	자궁경부암	0		4	2	5	3	4	5	3	5	5	5	4	5	4	4	4	4	4	5	5	4	4	4	3	0	0	1	3	3	2	1	1	3	1	0
2	2	22	3	4	4	0	1	0		0		0		0		4	4	4	4	4	4	4	4	4	5	4	4	3	4	4	3	4	4	4	4	4	4	3	0	0	1	2	3	3	1	1	3	1	1
2	2	22	3	4	4	0	1	0		0		0		1	피부과	4	4	5	3	3	4	4	4	4	5	4	4	4	4	4	4	4	4	4	3	3	2	2	0	1	1	2	2	2	1	1	2	1	1
2	2	22	4	4	2	0	1	0		0		1	인플루엔자	1	임파선 부음	3	3	4	3	4	4	4	4	5	5	4	4	4	4	4	4	3	3	3	3	3	3	3	0	0	1	1	2	2	1	1	2	1	1
2	2	22	2	5	4	1	0	0		0		1	독감, 폐렴구균	1	1방접종	3	1	5	4	3	5	5	5	5	5	4	4	4	4	4	4	5	5	5	5	5	5	3	0	0	2	1	3	2	3	3	1	2	2
2	2	23	3	3	4	1	2	0		0		1	A형간염/B형간염	0		4	1	5	4	4	4	4	4	4	4	3	4	3	4	3	3	4	3	5	4	4	4	1	0	0	1	1	2	3	1	1	3	1	2
2	1	23	1	4	1	1	1	0		0		0		1	감기	5	5	5	5	5	5	4	5	5	5	5	5	4	4	4	4	5	5	4	5	4	5	2	0	0	1	1	1	2	2	3	2	1	2
2	2	23	1	5	2	1	1	1	비염	0		0		1	치과	3	2	4	3	4	5	3	5	5	5	4	4	4	4	4	4	3	3	3	3	3	5	2	0	1	1	2	3	2	2	2	2	1	2
2	2	23	2	5	4	0	1	0		0		1	인플루엔자	1	장염	3	2	5	4	4	5	5	5	5	5	2	5	3	4	4	4	2	4	3	2	2	3	3	0	0	0	3	3	3	1	1	3	1	2
2	2	23	4	1	4	0	1	0		0		0		0		4	2	5	4	4	3	3	4	5	5	2	4	4	4	3	3	4	5	5	5	5	5	2	0	0	1	1	1	1	2	2	1	3	2
2	2	23	4	5	2	1	1	1	비염	0		0		1	치과	3	2	4	3	4	5	3	5	5	5	4	4	4	4	4	4	3	3	3	3	3	5	2	0	1	1	2	3	2	2	2	2	1	2
2	2	23	4	2	2	1	1	0		0		0		0		5	3	5	4	5	3	3	5	5	5	2	2	4	4	4	4	4	4	5	4	4	4	3	0	0	1	2	3	3	1	1	2	1	2
2	2	23	4	2	4	0	1	0		0		1	인플루엔자	0		4	1	5	5	4	5	4	5	5	5	5	4	4	4	4	4	4	5	4	4	4	3	3	0	0	1	2	3	3	0	0	3	0	0
2	2	23	1	3	4	0	0	0		0		0		1	장염	3	1	1	4	4	2	2	5	5	4	2	5	4	4	3	3	4	4	5	5	5	4	2	0	0	0	3	3	1	2	2	1	2	2
2	2	23	3	5	4	1	0	0		0		1	독감, 폐렴구균	1	1방접종	3	1	5	4	3	5	5	5	5	5	4	4	4	4	4	4	5	5	5	5	5	5	3	0	0	2	1	3	2	3	3	1	2	2
2	2	23	3	5	1	0	0	0		1	(만성)기관지염	0		1	건강검진	5	2	5	4	5	5	5	5	4	5	5	5	4	4	4	4	4	4	5	4	5	3	2	0	0	3	3	3	3	1	2	2	3	2
2	2	23	4	2	1	0	0	0		0		1	A형간염/B형간염	1	1방접종	4	2	4	4	4	5	5	5	5	5	5	4	4	4	4	4	4	3	4	3	3	4	3	0	0	0	1	3	3	1	2	2	1	1
2	2	23	4	2	2	0	0	0		0		0		0		4	2	5	4	4	4	5	5	4	5	4	5	4	4	4	3	3	3	3	4	4	3	3	0	0	0	3	3	3	1	1	3	0	1
2	2	23	4	2	4	0	0	0		0		0		0		5	5	5	5	5	5	5	5	5	5	5	5	4	4	4	4	4	4	5	4	4	4	3	0	0	1	2	3	2	1	1	3	1	1
2	2	23	4	2	1	0	0	0		0		1	A형간염/B형간염	0		4	4	4	4	4	5	5	5	5	5	4	3	4	4	4	4	4	4	4	4	4	4	2	0	0	2	2	1	2	1	2	2	1	1
2	2	24	4	4	4	0	2	0		0		0		0		4	2	5	4	4	4	3	5	5	5	4	5	3	4	3	4	5	5	5	5	5	4	3	0	0	1	2	3	3	1	1	3	2	1
2	1	24	2	4	4	0	0	0		0		1	독감	1	1방접종	5	2	3	4	4	4	5	5	5	5	5	4	3	4	4	4	3	3	3	3	3	4	2	0	0	1	2	2	2	2	1	3	2	1
2	1	25	3	4	4	1	2	0		0		0		0		3	3	3	3	3	4	4	4	4	5	4	5	4	4	4	4	3	3	4	4	4	5	3	1	0	0	1	3	1	1	1	2	1	1
2	2	25	4	4	4	1	2	0		1	천식	0		0		4	4	4	5	4	5	3	5	4	3	5	3	4	4	4	4	1	1	1	1	3	4	3	0	0	0	3	3	3	0	0	3	0	0
2	1	25	4	5	4	0	1	0		0		0		0		4	1	5	4	4	5	4	3	5	5	3	4	4	4	4	4	5	5	5	5	5	4	3	0	0	2	1	3	3	2	3	3	2	1
2	1	26	4	2	4	0	0	0		0		1	인플루엔자	0		5	5	5	5	5	5	5	5	5	5	5	5	3	4	4	4	5	5	5	5	5	1	3	0	0	0	3	3	3	0	0	3	0	0
2	2	27	4	4	1	1	2	0		0		0		0		5	2	4	5	5	5	4	5	5	5	2	4	4	4	4	3	5	5	5	5	2	5	3	0	0	3	3	3	3	0	0	3	0	2
2	1	27	4	3	1	0	2	0		0		1	A형간염/B형간염	1	근골격	2	2	3	2	3	4	4	4	4	3	4	3	3	2	3	3	3	3	2	3	2	4	2	0	0	0	3	2	2	1	2	1	2	1
2	2	27	4	2	4	0	1	0		0		0		0		3	3	3	4	4	3	3	4	4	5	3	5	3	4	3	4	3	4	4	2	2	2	3	0	0	0	3	3	3	0	0	2	0	0
2	2	27	4	4	4	0	0	0		0		0		0		5	5	5	5	4	4	3	5	5	5	5	5	4	4	4	4	4	4	5	5	4	5	2	0	0	2	0	2	0	2	3	1	2	1
2	1	28	4	4	4	0	2	0		0		0		0		4	2	5	4	4	4	3	5	5	5	4	5	3	4	3	4	5	5	5	5	5	4	3	0	0	1	2	3	3	1	1	3	2	1
2	2	28	1	5	4	0	1	0		0		0		0		5	5	5	5	5	5	5	5	5	5	4	5	4	4	4	4	3	3	1	1	1	5	3	0	0	0	3	3	3	0	0	3	0	0
2	2	28	4	5	1	0	1	0		0		0		1	ㅇ	5	5	5	5	5	4	4	4	5	4	4	5	4	4	4	4	3	4	5	4	3	5	2	0	0	1	1	2	0	3	2	2	2	1
2	1	29	4	5	1	0	0	0		1	(만성)기관지염	0		1	건강검진	5	2	5	4	5	5	5	5	4	5	5	5	4	4	4	4	4	4	5	4	5	3	2	0	0	3	3	3	3	1	2	2	3	2
2	2	20	1	4	4	0	1	0		0		0		0		4	5	4	4	4	2	2	3	5	5	4	5	3	3	2	3	4	4	4	3	3	4	2	0	0	3	0	3	1	3	2	3	2	1
2	2	20	1	4	2	0	1	0		0		1	인플루엔자	1	임파선 부음	3	3	4	3	4	4	4	4	5	5	4	4	4	4	4	4	3	3	3	3	3	3	3	0	0	1	1	2	2	1	1	2	1	1
2	1	20	2	5	4	0	1	0		0		0		0		3	4	4	4	3	5	5	5	2	5	3	4	4	4	4	3	4	4	5	3	2	4	3	0	0	1	3	3	1	2	1	0	1	3
2	2	20	2	3	1	0	1	0		0		0		0		3	3	4	4	4	4	4	3	4	5	4	3	3	4	3	3	3	3	3	4	4	3	2	0	0	1	1	3	3	1	1	3	1	2
2	2	20	3	5	4	0	1	0		0		0		0		4	1	5	4	4	5	4	3	5	5	3	4	4	4	4	4	5	5	5	5	5	4	3	0	0	2	1	3	3	2	3	3	2	1
2	2	20	1	4	4	0	0	0		0		1	인플루엔자	1	1방접종	4	2	5	3	4	5	4	4	5	5	4	4	4	4	4	4	4	4	5	5	4	4	3	0	0	2	3	3	3	2	2	3	1	1
2	1	20	1	4	4	0	0	0		0		0		0		4	4	4	4	4	3	3	3	3	5	5	5	4	4	4	4	5	5	5	5	5	4	3	0	0	1	1	2	2	2	2	3	2	2
2	2	21	2	2	4	0	0	0		0		0		0		3	4	5	3	3	3	5	5	5	5	5	5	4	4	4	4	4	4	4	4	1	5	3	0	0	0	3	3	3	1	3	3	0	0
2	2	21	2	2	4	0	0	0		0		1	독감주사	1	1방접종	4	4	5	5	5	5	5	5	4	5	5	5	4	4	4	4	4	5	3	4	3	5	3	0	0	0	1	3	3	2	2	2	1	1
2	2	21	2	4	4	0	0	0		0		1	자궁경부암	0		4	4	4	5	4	5	3	3	4	5	4	4	4	4	4	4	4	4	4	4	3	5	3	0	0	0	1	2	1	1	1	1	0	1
2	2	21	2	5	4	1	0	0		0		1	독감, 폐렴구균	1	1방접종	3	1	5	4	3	5	5	5	5	5	4	4	4	4	4	4	5	5	5	5	5	5	3	0	0	2	1	3	2	3	3	1	2	2
2	2	21	2	5	4	1	0	0		0		1	독감, 폐렴구균	1	1방접종	3	1	5	4	3	5	5	5	5	5	4	4	4	4	4	4	5	5	5	5	5	5	3	0	0	2	1	3	2	3	3	1	2	2
2	2	21	2	3	4	0	0	0		0		0		0		4	4	4	4	4	5	5	5	5	5	5	5	4	4	4	4	5	5	4	5	4	4	3	0	0	1	3	3	3	0	1	3	1	1
2	2	21	2	3	1	0	0	0		0		0		0		5	5	5	5	5	5	5	5	5	5	5	5	4	4	4	4	2	2	4	4	2	5	3	0	0	0	3	3	1	1	2	3	0	1
2	2	21	2	3	4	0	0	0		0		0		0		5	4	4	4	4	5	5	5	4	5	4	5	4	4	4	4	5	5	4	5	5	4	3	0	0	1	1	1	1	1	2	1	0	1
2	2	23	1	4	4	0	1	0		0		0		1	감기	4	4	5	2	5	5	5	5	4	5	3	3	4	4	4	4	5	4	4	4	4	5	2	0	1	1	2	3	1	2	1	2	2	2
2	2	23	1	3	4	0	1	0		0		0		0		5	2	5	3	4	5	5	3	4	5	3	5	3	4	4	4	4	4	5	4	3	4	1	0	0	2	0	1	1	2	3	1	2	2
2	1	23	2	1	4	0	1	0		0		0		0		4	2	5	4	4	3	3	4	5	5	2	4	4	4	3	3	4	5	5	5	5	5	2	0	0	1	1	1	1	2	2	1	3	2
2	1	23	2	1	4	0	1	0		0		0		0		4	2	5	4	4	3	3	4	5	5	2	4	4	4	3	3	4	5	5	5	5	5	2	0	0	1	1	1	1	2	2	1	3	2
2	1	23	2	2	4	0	1	0		0		0		0		4	3	4	3	4	4	3	4	4	5	3	4	3	4	4	3	4	4	4	4	4	5	2	0	0	1	2	2	2	2	2	2	1	2
2	1	23	2	2	4	0	1	0		0		0		0		5	3	5	4	4	5	5	5	5	5	5	5	4	4	4	4	3	4	3	4	3	2	3	0	0	0	3	3	3	0	0	3	0	2
2	1	23	2	4	4	0	1	0		0		1	파상풍-디프테리아	1	습진	2	1	4	4	2	4	4	2	5	5	3	4	4	4	4	3	4	4	4	4	4	4	3	0	0	1	3	3	3	0	1	3	1	1
2	2	23	2	5	4	0	1	0		0		0		0		5	5	5	5	5	5	5	5	5	5	4	5	4	4	4	4	3	3	1	1	1	5	3	0	0	0	3	3	3	0	0	3	0	0
2	1	23	2	2	4	0	1	0		0		0		0		2	1	3	2	2	4	4	4	4	5	3	3	3	4	4	3	3	3	3	3	3	2	2	0	0	0	2	3	3	1	1	3	0	0
2	1	23	2	2	4	0	1	0		0		1	인플루엔자	0		4	2	4	5	4	5	2	5	3	5	3	3	3	4	4	4	4	5	4	5	3	5	3	0	0	3	1	3	3	1	1	2	1	1
2	2	23	3	4	4	0	1	0		0		0		1	보건증 발급	5	5	5	5	5	5	4	5	5	5	4	5	3	4	4	3	5	5	5	5	5	4	3	0	0	3	3	3	3	0	1	1	1	1
2	2	23	3	4	1	1	1	0		0		0		1	감기	5	5	5	5	5	5	4	5	5	5	5	5	4	4	4	4	5	5	4	5	4	5	2	0	0	1	1	1	2	2	3	2	1	2
2	2	23	3	4	4	0	1	0		0		0		0		4	4	4	4	4	4	4	4	4	5	4	4	3	4	4	3	4	4	4	4	4	4	3	0	0	1	2	3	3	1	1	3	1	1
2	2	23	3	4	4	0	1	0		0		1	인플루엔자	1	눈 염증	4	2	5	4	4	4	3	4	5	5	5	4	3	4	4	4	3	5	4	5	3	4	3	0	0	1	3	3	3	1	1	3	1	1
2	2	23	3	4	1	0	1	0		0		1	인플루엔자	0		4	3	5	4	4	4	4	5	3	5	4	5	4	4	4	4	3	3	4	4	2	5	2	0	1	1	2	3	2	2	2	1	2	2
2	2	23	3	5	4	0	1	0		1	비염	0		1	항체주사 맞기 위함	5	3	4	5	5	4	2	5	5	5	4	3	3	4	4	4	4	3	5	2	3	4	2	0	0	2	2	3	3	2	2	1	0	2
2	2	23	3	5	2	1	1	1	비염	0		0		1	치과	3	2	4	3	4	5	3	5	5	5	4	4	4	4	4	4	3	3	3	3	3	5	2	0	1	1	2	3	2	2	2	2	1	2
2	2	23	3	5	2	1	1	1	비염	0		0		1	치과	3	2	4	3	4	5	3	5	5	5	4	4	4	4	4	4	3	3	3	3	3	5	2	0	1	1	2	3	2	2	2	2	1	2
2	2	23	3	5	2	1	1	1	비염	0		0		1	치과	3	2	4	3	4	5	3	5	5	5	4	4	4	4	4	4	3	3	3	3	3	5	2	0	1	1	2	3	2	2	2	2	1	2
2	2	23	3	3	1	0	1	0		0		0		0		5	4	5	5	5	4	3	4	5	5	5	5	3	4	4	4	3	4	4	2	2	5	3	0	0	2	1	3	1	2	1	1	2	0
2	2	23	4	2	1	0	1	0		0		0		1		3	3	3	4	4	5	5	5	5	5	3	4	4	4	4	4	4	4	5	5	5	4	2	0	1	1	2	2	2	3	2	1	2	2
2	2	23	4	2	4	0	1	0		0		0		0		4	4	5	4	4	5	2	4	4	4	2	5	4	4	4	4	4	5	5	4	4	4	3	0	0	1	1	1	1	2	2	2	1	2
2	2	23	4	4	4	0	1	0		0		0		1	피부과	4	4	5	3	3	4	4	4	4	5	4	4	4	4	4	4	4	4	4	3	3	2	2	0	1	1	2	2	2	1	1	2	1	1
2	2	23	4	4	4	0	1	0		0		0		0		5	4	5	4	4	5	5	5	5	5	4	5	4	4	4	4	4	5	5	5	3	5	3	0	0	0	3	3	3	1	0	3	0	0
2	2	23	4	4	4	0	1	0		1	비염, 축농증	0		1	감기	4	3	5	4	4	4	4	4	3	5	3	4	3	4	4	4	5	2	4	5	5	5	2	0	1	0	3	3	1	1	2	3	1	2
2	2	23	4	4	4	0	1	0		0		0		0		4	3	5	5	4	5	3	5	4	5	4	5	4	4	4	4	4	4	4	4	5	4	3	0	0	0	2	3	2	1	1	2	1	2
2	2	23	4	5	4	0	1	0		0		1	인플루엔자	1	장염	3	2	5	4	4	5	5	5	5	5	2	5	3	4	4	4	2	4	3	2	2	3	3	0	0	0	3	3	3	1	1	3	1	2
2	2	23	4	5	1	0	1	0		0		0		1	ㅇ	5	5	5	5	5	4	4	4	5	4	4	5	4	4	4	4	3	4	5	4	3	5	2	0	0	1	1	2	0	3	2	2	2	1
2	1	23	1	4	1	1	0	0		0		1	A형간염/B형간염	0		1	1	1	1	3	5	5	5	4	5	2	5	4	4	4	4	4	4	4	4	4	5	3	0	0	0	3	3	3	0	0	3	0	0
2	1	23	2	4	4	0	0	0		0		1	인플루엔자	1	1방접종	2	2	4	3	2	4	3	4	4	5	3	4	4	4	4	4	4	4	5	5	5	4	3	0	0	0	2	3	3	1	1	3	0	1
2	1	23	2	4	4	1	0	0		0		0		1	발목염좌	4	3	5	3	4	5	3	4	5	5	3	5	3	4	4	4	5	5	4	2	1	5	3	0	0	0	0	3	1	3	1	3	0	1
2	1	23	2	4	1	1	0	0		0		1	파상풍-디프테리아	1	상처봉합	3	1	1	3	1	5	5	5	5	5	5	5	4	4	4	4	3	5	5	5	2	5	3	0	0	3	1	3	3	2	3	3	1	2
2	2	23	2	5	4	0	0	0		0		1		0		4	2	5	4	3	4	3	3	4	4	4	4	2	4	3	3	3	3	3	3	3	3	1	0	0	1	2	2	2	1	2	1	2	2
2	2	23	2	5	1	0	0	0		0		0		0		5	5	5	5	5	5	4	5	5	5	4	5	3	4	4	4	4	4	4	4	4	4	3	0	0	1	2	3	1	1	1	2	1	2
2	1	23	2	3	4	0	0	0		0		0		0		5	1	5	4	4	5	5	5	5	5	4	5	4	4	4	4	2	3	5	3	1	5	3	0	0	0	2	3	3	0	0	3	0	0
2	1	23	2	3	1	0	0	0		0		1	파상풍-디프테리아	1	근육통치료	3	4	4	4	4	3	3	4	4	5	5	4	4	4	4	4	3	4	4	4	3	3	3	0	0	1	2	3	3	1	1	3	1	1
2	2	23	3	4	1	0	0	0		0		1	인플루엔자	0		4	4	5	5	4	4	3	4	5	5	5	5	4	4	4	4	5	4	5	5	5	4	3	0	0	2	1	2	1	2	2	1	1	0
2	2	23	3	4	4	0	0	0		0		0		0		5	5	5	5	4	4	3	5	5	5	5	5	4	4	4	4	4	4	5	5	4	5	2	0	0	2	0	2	0	2	3	1	2	1
2	2	23	3	5	2	0	0	0		1	(만성)기관지염	0		1	잠복결핵검사	4	5	5	3	4	5	2	5	5	5	3	4	4	4	4	4	5	5	5	4	3	5	3	0	0	3	1	3	3	3	2	3	3	2
2	2	23	4	2	4	0	0	0		1	비염	0		1	감기	4	3	5	4	4	4	3	4	3	5	4	3	4	4	4	4	5	5	5	5	5	5	1	0	0	2	1	3	3	1	1	3	0	2
2	2	23	4	3	4	0	0	0		0		0		1	장염	3	1	1	4	4	2	2	5	5	4	2	5	4	4	3	3	4	4	5	5	5	4	2	0	0	0	3	3	1	2	2	1	2	2
2	2	23	4	3	1	0	0	1	빈혈, 비염	1	만성비염	0		1	기저질환치료	4	5	4	5	5	5	5	3	4	5	4	4	4	4	4	4	5	5	5	5	5	5	3	0	0	1	2	3	3	2	2	3	1	2
2	2	23	4	4	4	0	0	0		0		1	인플루엔자	0		4	1	5	4	3	5	1	4	4	5	2	5	2	4	4	2	3	1	3	5	4	5	2	1	0	0	3	3	3	0	1	1	1	1
2	2	23	4	4	4	0	0	0		0		1	독감	1	1방접종	5	2	3	4	4	4	5	5	5	5	5	4	3	4	4	4	3	3	3	3	3	4	2	0	0	1	2	2	2	2	1	3	2	1
2	2	23	4	5	4	0	0	0		0		0		0		5	4	4	4	4	4	4	4	5	5	4	3	4	4	4	4	4	4	4	4	4	4	1	0	1	2	1	2	0	3	2	1	2	1
2	2	23	4	3	1	0	0	0		0		0		0		3	1	4	3	4	4	3	4	5	5	5	2	3	3	4	4	4	4	4	3	3	3	3	0	0	2	1	3	2	2	2	3	2	3
2	2	23	4	3	1	0	0	0		0		0		0		3	1	4	3	4	4	3	4	5	5	5	2	3	3	4	4	4	4	4	3	3	3	3	0	0	2	1	3	2	2	2	3	2	3
2	1	25	3	2	4	0	1	0		0		0		0		2	2	4	4	4	5	2	2	3	5	3	4	3	4	4	4	4	4	4	4	4	4	3	0	0	2	2	3	3	2	2	2	3	3
2	1	25	4	5	4	1	1	0		0		0		1	부상	3	1	5	5	3	5	3	5	4	5	3	5	4	4	4	4	5	5	5	5	5	3	2	0	0	2	0	1	2	3	3	3	3	3
2	1	25	4	3	4	0	1	0		0		0		0		3	4	4	4	4	3	3	4	4	3	4	3	4	4	4	4	2	4	2	4	4	4	3	0	0	0	2	2	3	1	1	2	2	1
2	1	25	4	2	4	0	1	0		0		0		0		4	2	5	3	5	4	3	4	5	5	3	4	3	4	3	4	4	5	4	4	4	4	2	0	0	0	3	3	3	1	1	3	1	1
2	2	25	1	5	3	0	0	1	저혈압	0		0		1	기저질환치료	3	3	5	4	4	5	5	5	5	5	5	3	4	4	4	4	4	4	5	2	1	4	2	0	0	1	1	2	1	2	2	1	1	2
2	1	25	3	5	4	0	0	0		0		0		0		3	5	5	5	5	5	3	3	4	5	4	3	4	4	4	4	3	4	4	4	3	4	3	0	0	0	3	3	3	0	0	3	0	1
2	1	25	4	4	1	0	0	0		0		0		1	심혈관질환검사및치료	4	4	4	5	5	4	4	4	4	5	3	4	4	4	4	3	4	2	4	4	4	5	1	0	0	3	0	2	1	2	3	0	3	2
2	1	25	4	4	4	0	0	0		0		0		0		5	3	3	3	5	5	4	5	5	5	5	5	4	4	4	4	3	2	2	3	3	3	3	0	0	0	3	3	3	0	0	3	2	0
2	2	25	4	4	4	0	0	0		0		0		1	장염 위경련	4	3	4	5	5	4	4	4	5	5	3	3	4	4	4	4	3	3	5	3	3	3	2	0	0	1	1	2	2	2	2	2	1	2
2	2	27	4	4	4	1	1	0		0		0		1	산부인과	2	4	4	4	4	4	5	5	5	5	3	3	4	4	4	4	3	4	4	4	4	4	3	0	0	1	3	3	3	0	0	3	1	1
2	1	27	4	3	4	0	1	0		0		1	A형간염/B형간염	1	1방접종	2	2	2	2	2	4	3	5	5	5	3	4	4	4	4	4	3	3	3	3	3	3	3	0	0	0	3	3	3	0	0	3	0	1
2	1	27	4	2	4	0	1	0		1	천식	0		0		5	2	5	5	3	5	5	5	5	5	2	5	4	4	4	4	5	5	5	5	5	5	3	0	0	1	2	3	3	3	1	3	1	1
2	1	27	4	1	4	1	0	0		0		1	A형간염/B형간염	0		3	3	4	5	4	3	4	3	5	5	5	4	4	4	4	4	5	5	5	5	5	5	3	0	0	3	3	3	2	2	2	3	3	3
2	1	28	4	2	4	0	1	1	고혈압	1	(만성)기관지염	0		0		5	3	5	4	5	4	4	5	5	5	3	4	4	4	4	4	4	5	5	3	3	5	3	0	0	0	2	1	1	2	1	2	1	2
2	2	28	4	2	2	0	1	0		0		1	독감주사	1	1방접종	4	4	4	4	4	5	5	4	4	5	3	4	4	4	4	4	3	4	4	4	4	4	2	0	0	1	2	3	3	1	1	3	1	2
[truncated: 9 more columns]

## Sheet: spss_data
간호/비간호	1. 귀하의 성별은 무엇입니까?	2. 귀하의 연령은 무엇입니까?	3. 귀하의 학년은 무엇입니까?	4. 귀하의 소속 학과 계열은 무엇입니까?	5. 귀하의 종교는 무엇입니까?	1. 귀하는 흡연을 하십니까?	2. 귀하의 일주일 음주량은 어떻게 되십니까?	3. 귀하는 만성질환을 가지고 있습니까?	3-1. 귀하가 가지고 계신 만성질환의 종류는 무엇입니까?	4. 귀하는 호흡기 질환을 가지고 있습니까?	4-1. 귀하가 가지고 계신 호흡기 질환의 종류는 무엇입니까?	5. 최근 1년 이내에 의료기관에서 1방접종을 하신 적이 있으십니까?	5-1. 최근 1년 이내에 의료기관에서 받은 1방접종의 종류는 무엇입니까?	6. 최근 3개월 이내에 의료기관을 이용하신 적이 있으십니까?	6-1. 최근 3개월 이내에 의료기관을 이용하신 목적은 무엇입니까?	1. 코로나바이러스감염증-19에 감염될까봐	2. 코로나바이러스감염증-19에 감염되면 질병이 중해져서 사망할까봐	3. 소아나 고령, 지병이 있는 가족이 코로나바이러스감염증-19에 감염될까봐	4. 전국적으로 코로나바이러스감염증-19가 유행하여 사회경제적 혼란이 올까봐	5. 전반적으로 코로나바이러스감염증-19 때문에	1. 비누나 세정제로 자주 손씻기	2. 씻지 않은 손으로 눈, 코, 입을 만지지 말기	3. 재채기나 기침시 휴지나 손수건으로 가리기	4. 발열, 호흡기 증상이 있는 타인과의 접촉을 피하기	5. 외출 시 마스크 착용하기	6. 사람들이 많이 모이는 장소를 피하기	7. 병문안 및 의료기관 방문을 자제하기	1. 식사하기 전 얼마나 자주 손을 씻었습니까?	2. 화장실 다녀온 후 얼마나 자주 손을 씻었습니까?	3. 외출 후 집에 돌아왔을 때 얼마나 자주 손을 씻었습니까?	4. 비누나 손 세정제를 얼마나 자주 사용하였습니까?	1. 정부의 코로나바이러스감염증-19 1방 지침과 홍보는 어떠하였습니까?	2. 대중매체를 통한 코로나바이러스감염증-19 발생 정보 전달은 어떠하였습니까?	3. 국내 의료기관의 코로나바이러스감염증-19 감염 대응 능력은 어떠하였습니까?	4. 코로나바이러스감염증-19 확산 방지 대책(격리조치 등)은 어떠하였습니까?	5. 전반적인 코로나바이러스감염증-19 유행에 대한 정부의 대응은 어떠하였습니까?	6. 코로나바이러스감염증-19 유행 기간 중 스트레스 인지	7. 코로나바이러스감염증-19 유행 기간 중 주관적건강수준	8. 코로나바이러스감염증-19 감염으로 인한 격리 및 능동감시경험 여부	9. 호흡기증상 경험 여부	1.현재 매우 편안하며 건강하다고 느낀다.	2.잠자고 난 후에도 개운한 감이 없다.	3.매우 피곤하고 지쳐 있어 먹는 것조차도 힘들다고 느껴진다.	4.근심 걱정 때문에 편안하게 잠을 자지 못한다.	5.정신이 맑고 깨끗하다고 느낀다.	6.기력(원기)이 왕성함을 느낀다.	7.밤이면 심란해지거나 불안해진다.	8.대다수의 사람들과 마찬가지로 나 자신을 잘 관리하고 있다고 생각한다.	9.전체적으로 현재 내가 하고 있는 일은 잘 되어가고 있다고 느낀다.
nursing/non-nursing	gender	age	grade	major	Religion	Smoking	Drinking	Chronic disease	Chronic disease name	Respiratory disease	Respiratory disease name	Vaccination within 12 months		Hospital visits within three months		Sensitivity to COVID-19 infection 1	Sensitivity to COVID-19 infection 2	Sensitivity to COVID-19 infection 3	Sensitivity to COVID-19 infection 4	Sensitivity to COVID-19 infection 5	Attitude toward preventive behaviors 1	Attitude toward preventive behaviors 2	Attitude toward preventive behaviors 3	Attitude toward preventive behaviors 4	Attitude toward preventive behaviors 5	Attitude toward preventive behaviors 6	Attitude toward preventive behaviors 7	Handwashing compliance 1	Handwashing compliance 2	Handwashing compliance 3	Handwashing compliance 4	Trust in policy 1	Trust in policy 2	Trust in policy 3	Trust in policy 4	Trust in policy 5	perceived stress	PHS during COVID-19	Stayed at home for COVID-19	Respiratory symptoms	Psychosocial problems 1	Psychosocial problems 2	Psychosocial problems 3	Psychosocial problems 4	Psychosocial problems 5	Psychosocial problems 6	Psychosocial problems 7	Psychosocial problems 8	Psychosocial problems 9
1	2	21	4	1	4	0	1	0		0		0		0		4	3	4	3	4	4	3	4	4	5	3	4	3	4	4	3	4	4	4	4	4	5	2	0	0	1	2	2	2	2	2	2	1	2
1	2	21	4	1	4	0	1	0		0		0		0		4	4	5	4	4	5	2	4	4	4	2	5	4	4	4	4	4	5	5	4	4	4	3	0	0	1	1	1	1	2	2	2	1	2
1	2	21	4	1	1	0	1	0		0		0		1		3	3	3	4	4	5	5	5	5	5	3	4	4	4	4	4	4	4	5	5	5	4	2	0	1	1	2	2	2	3	2	1	2	2
1	2	21	4	1	4	0	0	0		0		1	독감주사	1	1방접종	4	4	5	5	5	5	5	5	4	5	5	5	4	4	4	4	4	5	3	4	3	5	3	0	0	0	1	3	3	2	2	2	1	1
1	1	21	1	1	2	1	1	0		0		0		0		5	3	5	4	5	3	3	5	5	5	2	2	4	4	4	4	4	4	5	4	4	4	3	0	0	1	2	3	3	1	1	2	1	2
1	2	21	1	1	4	0	1	0		0		0		0		3	3	3	4	4	3	3	4	4	5	3	5	3	4	3	4	3	4	4	2	2	2	3	0	0	0	3	3	3	0	0	2	0	0
1	2	21	1	1	4	0	1	0		0		0		0		4	1	5	3	4	4	4	4	5	5	4	5	4	4	4	4	4	4	4	4	4	3	3	0	0	0	2	3	3	1	1	3	0	2
1	2	21	3	1	4	0	1	0		0		1	A형간염/B형간염	1	기저질환치료	5	4	4	5	5	4	4	3	5	5	5	5	3	4	3	4	4	3	3	3	4	4	3	0	0	0	3	3	3	0	0	3	1	1
1	2	21	4	1	4	0	1	0		0		0		0		2	2	4	4	4	5	2	2	3	5	3	4	3	4	4	4	4	4	4	4	4	4	3	0	0	2	2	3	3	2	2	2	3	3
1	2	21	4	1	4	0	1	0		0		0		1	사랑니발치	4	4	5	5	4	3	3	4	4	5	4	4	3	4	4	3	3	3	3	3	3	4	2	0	0	1	1	2	2	1	2	2	1	2
1	2	23	3	1	4	0	2	0		0		1	A형간염/B형간염	1	감기	5	5	3	3	4	5	5	4	5	5	5	4	4	4	4	4	5	4	3	5	4	4	3	0	0	0	3	2	3	2	2	3	1	2
1	2	23	4	1	4	0	2	0		0		1	인플루엔자	1	치과	5	3	2	3	4	4	5	5	5	5	5	5	4	4	4	4	4	5	4	4	3	4	3	0	1	0	3	3	3	1	1	3	2	0
1	2	23	3	1	4	0	1	0		0		1	A형간염/B형간염	0		5	5	5	5	4	5	4	5	5	5	5	5	4	4	4	4	5	5	5	4	3	5	3	0	0	0	3	3	3	0	0	3	0	0
1	2	23	4	1	4	1	1	0		0		1	A형간염/B형간염	1	B형간염 항체검사	5	4	2	5	3	4	4	4	2	5	5	5	3	4	4	4	5	4	3	3	4	4	3	0	0	0	1	2	3	2	3	3	1	1
1	2	23	4	1	4	1	1	0		0		0		1	B형간염 항체검사	5	4	2	4	4	4	5	5	5	5	5	4	4	4	4	4	5	4	3	3	4	4	3	0	0	1	0	2	1	1	1	3	1	0
1	2	23	4	1	4	1	1	0		0		0		1	B형간염 항체검사	5	3	2	4	4	4	5	5	5	5	5	4	4	4	4	4	4	4	3	3	4	4	3	0	0	1	1	2	3	1	2	3	1	1
1	2	23	3	1	1	0	0	0		0		1	MMR	1	흉부 X-ray 촬영(제출용)	4	4	2	4	4	4	4	3	4	5	5	4	3	4	4	3	1	5	4	4	3	4	3	0	0	1	3	3	3	1	1	3	0	1
1	2	23	3	1	4	0	0	0		0		0		0		5	5	5	5	5	5	5	5	5	5	5	5	4	4	4	4	4	5	2	2	4	4	3	0	0	0	3	3	3	2	1	2	0	1
1	2	23	4	1	4	0	0	0		0		1	A형간염/B형간염	0		5	4	2	5	4	4	5	4	4	5	5	4	4	4	4	4	5	4	4	4	3	5	3	0	0	1	3	3	3	0	0	3	1	1
1	2	24	4	1	4	0	0	0		0		0		0		3	4	5	3	3	3	5	5	5	5	5	5	4	4	4	4	4	4	4	4	1	5	3	0	0	0	3	3	3	1	3	3	0	0
1	1	25	3	1	4	1	1	0		0		1	A형간염/B형간염	1	피부과	4	4	3	4	4	4	4	4	4	5	4	3	4	4	4	4	4	4	4	4	5	4	3	0	0	1	1	2	2	2	1	1	1	1
1	1	25	3	1	4	0	0	0		1	천식	1	A형간염/B형간염	1	사랑니 제거	5	5	5	5	5	5	5	5	5	5	5	5	4	4	4	4	3	3	3	3	5	3	3	0	1	0	3	3	3	1	1	3	1	0
1	2	25	4	1	4	0	0	0		1	비염	0		1	감기	4	3	5	4	4	4	3	4	3	5	4	3	4	4	4	4	5	5	5	5	5	5	1	0	0	2	1	3	3	1	1	3	0	2
1	2	27	3	1	1	1	1	0		0		1	A형간염/B형간염	1	1방접종	4	5	5	5	5	5	4	4	5	5	5	4	4	4	4	4	5	5	4	3	5	5	2	0	0	2	0	2	2	3	3	2	2	2
1	2	28	4	1	4	0	1	0		0		0		0		5	3	5	4	4	5	5	5	5	5	5	5	4	4	4	4	3	4	3	4	3	2	3	0	0	0	3	3	3	0	0	3	0	2
1	2	28	3	1	1	0	0	0		0		1	A형간염/B형간염	1	X ray촬영	5	4	2	4	5	4	5	4	4	5	5	3	3	4	4	4	4	3	4	3	4	5	2	0	0	2	3	2	3	1	1	3	1	1
1	2	28	3	1	4	0	0	0		1	(만성)기관지염	1	파상풍-디프테리아	1	코로나바이러스감염증-19 검사	2	5	4	5	3	5	5	3	5	4	5	4	3	4	3	4	5	4	4	3	4	4	1	0	1	3	0	2	1	2	2	1	1	2
1	2	28	4	1	4	0	0	0		0		1	파상풍-디프테리아	1	식도염 위장질환 폐렴 코로나검사	2	5	5	5	5	5	5	2	5	5	5	4	3	4	4	4	3	3	4	4	2	4	1	0	1	3	0	2	1	2	3	0	0	2
1	2	29	3	1	3	0	1	0		0		1	인플루엔자	0		5	5	4	5	5	5	4	3	5	5	5	4	4	4	4	4	5	4	4	4	5	4	2	0	0	2	1	2	2	1	2	2	1	2
1	2	29	3	1	1	0	0	0		0		1	A형간염/B형간염	1	증명서 발급	4	3	5	5	5	5	4	4	5	5	3	5	3	4	4	4	5	4	4	4	3	4	2	0	0	1	3	2	3	0	1	3	0	0
1	2	30	3	1	3	0	1	0		0		1	인플루엔자	1	1방접종	5	5	4	5	5	5	5	4	5	4	5	3	4	4	4	4	5	4	4	4	5	4	2	0	0	1	1	2	2	0	2	2	1	2
1	2	20	1	1	2	0	1	0		1	비염	1	인플루엔자	1	코로나바이러스감염증-19 검사	5	4	5	5	5	5	2	3	5	5	3	5	4	4	4	4	5	5	5	5	5	4	3	1	0	2	1	3	2	1	1	1	1	1
1	2	20	2	1	1	0	1	0		0		1	인플루엔자	0		4	4	4	5	4	4	4	5	5	5	4	5	3	4	4	4	4	4	4	4	4	5	3	0	0	0	1	3	1	2	2	2	0	1
1	2	20	1	1	4	0	0	0		0		1	인플루엔자	0		5	5	5	5	5	5	5	5	5	5	5	5	3	4	4	4	5	5	5	5	5	1	3	0	0	0	3	3	3	0	0	3	0	0
1	2	20	1	1	4	0	0	0		0		1	자궁경부암	0		4	2	5	3	4	5	3	5	5	5	4	5	4	4	4	4	4	5	5	4	4	4	3	0	0	1	3	3	2	1	1	3	1	0
1	2	20	1	1	1	0	0	0		0		1	A형간염/B형간염	1	1방접종	4	2	4	4	4	5	5	5	5	5	5	4	4	4	4	4	4	3	4	3	3	4	3	0	0	0	1	3	3	1	2	2	1	1
1	2	20	1	1	2	0	0	0		0		0		0		4	2	5	4	4	4	5	5	4	5	4	5	4	4	4	3	3	3	3	4	4	3	3	0	0	0	3	3	3	1	1	3	0	1
1	2	20	1	1	4	0	0	0		0		0		1	감기	5	5	5	4	5	5	3	4	4	5	3	4	3	4	4	4	4	5	4	3	3	4	2	0	0	2	3	3	3	2	2	2	2	2
1	2	20	1	1	4	0	0	0		0		0		0		5	5	5	5	5	5	5	5	5	5	5	5	4	4	4	4	4	4	5	4	4	4	3	0	0	1	2	3	2	1	1	3	1	1
1	2	20	1	1	1	0	0	0		0		1	A형간염/B형간염	0		4	4	4	4	4	5	5	5	5	5	4	3	4	4	4	4	4	4	4	4	4	4	2	0	0	2	2	1	2	1	2	2	1	1
1	1	20	1	1	1	0	0	1	부비동염	1	축농증	0		0		5	5	5	5	5	5	5	5	5	5	5	5	4	4	4	4	5	5	3	4	2	5	3	0	0	1	1	3	3	1	0	3	0	1
1	2	20	1	1	4	0	0	0		0		1	독감	1	코로나바이러스감염증-19 검사	3	2	3	5	4	5	5	5	5	5	4	5	3	4	4	4	5	5	5	5	5	2	3	0	0	0	1	2	1	2	3	1	1	3
1	2	20	1	1	1	0	0	0		0		0		0		5	1	5	5	5	5	2	5	5	5	5	5	4	4	4	4	5	5	5	5	5	5	3	0	0	1	3	3	3	1	1	3	1	1
1	2	20	2	1	1	0	0	0		0		0		1	코로나바이러스감염증-19 검사	5	5	5	4	5	5	5	5	5	5	5	5	4	4	4	4	2	5	3	2	2	5	3	0	0	2	2	3	3	2	3	1	1	1
1	2	20	2	1	4	0	0	0		0		1	자궁경부암	1	감기	4	3	4	5	4	4	2	5	4	5	4	5	4	4	4	4	3	3	3	3	3	4	2	0	0	1	2	3	2	2	2	3	2	1
1	2	21	3	1	2	0	0	0		0		1	A형간염/B형간염	1	1방접종	5	4	4	5	4	4	5	5	5	5	5	5	4	4	4	4	4	4	4	3	3	4	3	0	0	1	3	3	3	0	1	3	0	0
1	2	21	3	1	4	0	0	0		0		1	A형간염/B형간염	0		5	3	2	4	3	4	4	2	5	5	5	5	4	4	4	4	5	4	4	3	3	5	3	0	0	0	1	3	3	2	2	3	1	1
1	2	21	3	1	4	0	0	0		0		1	A형간염/B형간염	0		5	4	3	4	5	5	4	4	5	5	5	4	4	4	4	3	3	2	3	2	4	4	3	0	0	2	1	3	1	2	2	2	3	3
1	2	21	3	1	4	0	0	0		0		1	A형간염/B형간염	0		5	5	5	5	5	5	5	5	5	5	5	5	4	4	4	4	4	4	2	1	5	2	2	0	0	2	0	0	0	3	3	0	3	3
1	1	23	2	1	4	0	1	0		1	(만성)기관지염	1	인플루엔자	1	1방접종	4	3	3	3	4	4	5	4	4	4	4	4	3	4	4	4	3	3	3	3	4	3	2	0	0	0	1	0	1	1	1	1	1	1
1	2	23	2	1	4	0	1	0		0		0		1	사랑니발치	4	4	5	5	4	3	3	4	4	5	4	4	3	4	4	3	3	3	3	3	3	4	2	0	0	1	1	2	2	1	2	2	1	2
1	2	23	3	1	4	0	1	0		0		1	A형간염/B형간염	1	역류성 식도염	4	3	5	4	4	5	3	5	5	5	3	2	4	4	4	4	4	4	4	4	4	5	3	0	0	1	2	3	3	1	1	2	1	3
1	2	23	3	1	2	0	1	0		0		0		0		4	2	4	5	5	4	4	5	5	5	3	4	4	4	4	4	4	3	4	4	4	5	3	0	0	1	1	3	0	2	3	0	1	2
1	2	23	3	1	4	0	1	0		0		1	A형간염/B형간염	0		5	3	5	5	5	5	4	5	5	5	5	5	4	4	4	3	5	5	4	3	4	5	3	0	0	2	2	1	0	2	2	1	2	2
1	2	23	3	1	4	0	1	0		0		1	A형간염/B형간염	0		5	2	5	5	5	4	3	5	3	5	5	5	4	4	4	3	3	2	5	5	3	5	3	0	0	0	3	3	3	1	1	2	3	1
1	2	23	3	1	4	0	1	0		0		1	A형간염/B형간염	1	1방접종	5	5	5	5	5	5	5	5	5	5	5	5	4	4	4	4	5	5	5	5	5	5	3	0	0	2	0	1	0	2	0	0	2	2
1	2	23	3	1	4	0	1	0		0		1	파상풍 디프테리아 a, b형간염	0		4	3	3	3	3	4	5	3	4	4	5	3	4	4	4	4	4	4	4	3	4	4	3	0	0	2	1	0	1	2	2	0	2	2
1	2	23	3	1	4	1	1	0		0		1	A형간염/B형간염	1	감기	2	3	2	2	4	3	3	5	5	5	5	4	4	4	4	4	3	3	3	3	3	3	2	0	0	0	3	3	2	2	2	2	1	1
1	2	23	3	1	2	0	1	0		0		1	A형간염/B형간염	0		5	4	4	5	4	5	5	5	5	5	5	5	4	4	4	4	4	4	4	4	5	4	2	0	0	1	2	2	2	1	1	3	1	1
1	2	23	3	1	4	0	1	0		0		1	A형간염/B형간염	0		5	5	5	5	4	5	4	5	4	5	5	5	4	4	4	3	4	4	4	4	3	4	3	0	0	1	3	1	2	0	0	3	1	2
1	2	23	3	1	1	0	1	0		1	(만성)기관지염	1	A형간염/B형간염	1	1방접종	5	4	1	4	4	3	5	5	5	5	5	4	4	4	4	4	5	5	5	5	3	4	3	0	0	2	1	3	1	3	3	1	2	2
1	2	23	3	1	2	0	1	0		0		1	A형간염/B형간염	1	1방접종	5	4	2	4	4	4	5	5	5	4	5	5	4	4	4	4	5	5	5	5	5	5	3	0	0	2	3	3	3	2	2	3	2	1
1	2	23	3	1	4	0	1	0		0		1	A형간염/B형간염	0		4	5	3	4	4	4	5	3	5	3	5	4	4	4	4	4	4	3	3	3	4	4	2	0	0	0	1	2	1	1	1	1	1	2
1	2	23	3	1	4	0	1	0		0		1	A형간염/B형간염	1	보건증	2	4	1	5	5	5	5	4	5	3	5	3	4	4	4	4	5	3	3	4	3	3	3	0	0	0	3	3	3	1	0	3	1	1
1	2	23	3	1	4	0	1	0		0		1	A형간염/B형간염	1	치과진료	2	4	1	5	3	4	5	4	2	5	5	2	4	4	4	4	2	2	2	2	3	2	3	0	0	0	3	1	3	2	2	3	2	1
1	2	23	3	1	4	0	1	0		0		1	A형간염/B형간염	1	기저질환치료	5	4	4	4	4	4	5	4	5	5	5	4	4	4	4	4	5	5	4	5	4	4	2	0	0	2	3	3	3	2	2	1	2	2
1	2	23	3	1	4	0	1	0		1	결핵	1	A형간염/B형간염	0		5	4	5	4	4	5	4	4	4	5	5	3	3	4	3	4	4	4	4	4	3	4	3	0	1	0	2	3	3	1	1	3	0	0
1	2	23	3	1	4	0	1	0		0		1	A형간염/B형간염	0		4	5	3	5	4	5	4	5	4	4	4	4	3	4	4	3	3	3	3	3	4	3	3	0	0	1	3	3	3	1	1	3	1	1
1	2	23	3	1	4	0	1	0		0		1	A형간염/B형간염	0		5	2	2	3	2	3	4	4	3	5	5	3	3	4	4	4	4	2	2	3	2	4	3	0	0	0	3	3	3	1	2	3	1	1
1	1	23	3	1	1	0	1	0		0		0		0		5	2	1	3	4	4	5	4	4	5	4	5	3	3	4	4	5	5	4	4	4	4	3	0	0	0	3	3	3	0	1	3	1	0
1	1	23	3	1	1	0	1	0		0		0	A형간염/B형간염	1	1방접종	4	3	3	3	3	2	4	5	5	5	4	5	3	3	3	1	5	4	5	4	5	5	1	0	0	3	2	1	1	2	3	2	1	2
1	2	23	3	1	4	0	1	0		0		1	A형간염/B형간염	1	1방접종	3	5	2	5	5	5	5	3	3	4	5	3	4	4	4	3	5	4	4	4	4	5	3	0	0	2	2	3	3	1	1	3	0	1
1	2	23	3	1	1	0	1	0		0		1	A형간염/B형간염	1	흉부 엑스레이	5	4	4	5	4	4	5	3	5	5	5	3	4	4	4	4	5	5	5	5	3	5	3	0	0	0	2	3	3	1	1	3	0	1
1	2	23	3	1	4	0	1	0		0		1	A형간염/B형간염	0		4	4	4	5	5	4	5	3	5	4	5	4	4	4	4	4	4	4	4	4	4	4	3	0	0	1	2	3	3	1	1	3	1	1
1	2	23	3	1	4	0	1	0		0		1	A형간염/B형간염	1	1방접종	5	5	2	5	4	4	4	2	5	4	5	5	3	4	4	4	4	5	4	4	4	4	2	0	0	0	3	2	3	1	0	3	2	0
1	1	23	3	1	1	0	1	0		0		1	A형간염/B형간염	1	1방접종	3	3	2	3	3	4	4	4	4	4	5	4	3	4	4	3	5	4	4	3	5	4	2	0	0	2	3	3	3	0	0	3	0	0
1	2	23	3	1	1	0	1	0		0		0		0		5	3	2	4	2	4	4	3	4	5	5	4	3	3	4	4	4	4	4	4	5	4	3	0	0	0	1	3	3	1	2	1	1	1
1	2	23	3	1	4	0	1	0		0		0		0		3	5	4	5	5	5	5	4	5	5	5	4	4	4	4	4	3	4	4	4	4	4	2	0	0	1	2	2	3	1	1	3	1	1
1	2	23	3	1	2	0	1	0		0		1	A형간염/B형간염	0		4	4	2	5	4	5	4	4	5	4	5	4	4	4	4	3	4	5	5	4	5	4	3	0	0	1	1	2	1	3	2	1	2	2
1	2	23	3	1	4	0	1	0		0		1	A형간염/B형간염	1	감기	3	4	5	5	4	4	5	4	2	4	5	3	3	4	4	4	5	5	5	4	4	4	3	0	0	2	2	3	3	1	1	1	1	1
1	2	23	3	1	4	0	1	0		0		1	인플루엔자	1	보건증 발급	5	4	1	5	5	3	4	4	5	5	5	3	4	4	4	4	4	4	4	4	3	4	3	0	0	0	3	3	3	0	0	3	1	1
1	2	23	4	1	4	0	1	0		0		1	A형간염/B형간염	0		4	4	5	5	5	4	3	5	5	5	5	5	3	4	3	3	4	5	5	3	4	4	2	0	0	2	3	3	3	1	1	3	1	0
1	2	23	4	1	4	1	1	0		0		0		1	B형간염 항체검사	5	4	2	4	4	4	5	5	5	5	5	4	4	4	4	4	5	5	4	4	4	4	3	0	0	1	0	1	1	3	2	3	2	1
1	2	23	4	1	2	0	1	0		0		1	인플루엔자	1	1방접종	3	1	1	4	1	2	3	3	3	4	5	3	3	4	4	4	4	4	4	4	3	3	3	0	0	0	3	3	3	0	0	3	0	0
1	2	23	4	1	4	0	1	0		0		1	인플루엔자	1	1방접종	5	4	3	5	4	4	5	4	5	5	5	3	4	4	4	4	5	4	4	4	5	5	3	0	0	2	1	1	1	2	2	1	2	2
1	1	23	2	1	1	0	0	0		0		1	파상풍-디프테리아	0		3	2	4	3	4	5	4	4	4	4	4	5	4	4	4	4	4	4	4	4	4	2	3	0	0	0	1	3	3	1	0	3	1	1
1	1	23	2	1	4	0	0	0		1	(만성)기관지염	1	신증후군출혈열	1	건강검진	3	4	4	4	5	5	5	5	4	4	3	3	3	4	3	4	4	5	4	4	5	3	2	0	0	1	3	3	1	2	1	1	2	2
1	2	23	3	1	4	0	0	0		0		1	인플루엔자	1	사마귀 치료	4	2	2	2	4	5	4	5	3	5	3	5	4	4	4	4	4	4	4	4	4	5	3	0	0	1	0	2	2	2	2	2	2	3
1	2	23	3	1	4	0	0	0		0		1	A형간염/B형간염	1	흉부엑스레이	4	5	5	5	5	5	5	5	5	5	5	5	4	4	4	4	5	4	4	2	5	4	3	0	0	1	1	1	2	3	2	0	1	2
1	2	23	3	1	4	0	0	0		0		1	인플루엔자	0		5	4	4	5	4	4	5	4	5	5	5	4	3	4	4	4	5	4	5	4	3	5	3	0	0	1	3	3	3	0	0	3	1	1
1	2	23	3	1	1	0	0	0		0		1	A형간염/B형간염	0		4	2	3	4	4	4	5	3	5	4	5	4	3	4	4	4	5	5	5	5	2	5	3	0	0	0	3	3	3	1	1	3	0	1
1	2	23	3	1	4	0	0	0		0		1	A형간염/B형간염	0		2	4	4	5	3	4	4	3	5	5	5	4	4	4	4	4	3	2	4	3	4	4	3	0	0	1	3	3	3	2	2	3	1	1
1	2	23	3	1	2	0	0	0		0		1	가다실9	1	1방접종	4	4	4	5	5	4	5	5	1	5	5	5	4	4	4	4	4	5	4	4	2	4	3	0	0	0	3	3	3	0	0	3	2	0
1	2	23	3	1	4	0	0	0		0		1	a형간염 홍역	1	배아파서	3	4	3	5	3	4	5	3	5	5	4	3	4	4	4	4	3	5	3	2	5	3	2	0	0	2	0	2	1	2	3	1	2	2
1	2	23	3	1	1	0	0	0		0		1	파상풍-디프테리아	0		5	5	5	5	5	5	4	3	2	5	5	5	4	4	4	4	5	5	5	5	5	5	3	0	0	0	1	3	3	0	0	3	1	2
1	2	23	3	1	4	0	0	0		0		1	A형간염/B형간염	1	기저질환치료	5	4	3	4	4	4	4	3	4	4	5	4	3	4	4	4	4	4	4	4	3	4	3	0	0	1	2	2	3	1	1	3	1	1
1	2	23	3	1	4	0	0	0		0		0		0		5	5	5	4	3	4	4	4	5	5	5	5	3	3	3	4	4	5	5	5	4	4	2	0	0	1	3	3	3	1	2	1	0	1
1	2	23	3	1	2	1	0	0		0		1	A형간염/B형간염	0		5	5	4	5	5	5	4	3	5	5	5	5	3	4	3	3	2	2	2	2	5	2	1	0	0	1	3	2	3	1	1	3	1	1
1	2	23	3	1	3	0	0	0		0		1	파상풍-디프테리아	1	감기	5	5	4	5	5	5	5	5	5	5	5	5	4	4	4	4	4	5	4	5	5	4	2	0	0	2	2	2	3	2	2	2	1	1
1	2	23	3	1	1	0	0	0		0		1	A형간염/B형간염	1	감기	4	4	4	4	4	4	4	4	4	4	4	5	3	4	4	4	3	3	3	3	4	3	3	0	0	1	2	1	1	1	1	1	1	1
1	2	23	3	1	4	0	0	0		0		1	A형간염/B형간염	1	1방접종	5	5	4	5	5	5	5	5	5	5	5	5	4	4	4	4	5	2	2	2	5	4	2	0	0	2	0	0	1	3	2	0	2	3
1	2	23	3	1	1	0	0	0		0		1	A형간염/B형간염	0		4	4	3	4	4	4	5	3	3	3	5	3	3	4	4	4	4	4	3	4	4	4	3	0	0	0	3	3	2	0	1	2	0	0
1	2	23	3	1	4	0	0	0		0		1	디프테리아, A형 간염, 수두	0		5	5	5	5	4	5	5	4	5	5	5	5	4	4	4	4	4	5	5	5	4	5	3	0	0	0	1	3	3	0	0	3	0	0
1	2	23	3	1	2	0	0	0		0		1	A형간염/B형간염	0		5	4	3	5	4	4	5	4	5	5	5	5	4	4	4	4	3	3	4	4	3	3	3	0	0	0	3	3	2	0	1	2	1	1
1	2	23	3	1	2	0	0	0		0		1	A형간염/B형간염	1	감기	5	4	3	3	4	5	4	2	4	4	5	5	2	4	4	4	5	3	3	2	5	4	3	0	0	1	2	3	3	2	2	3	1	1
1	2	23	3	1	4	0	0	0		0		1	가다실9	1	2드름 치료	3	5	2	5	4	5	4	2	5	5	5	3	2	4	4	4	4	5	5	5	4	4	1	0	0	2	1	3	3	1	1	3	2	2
1	2	23	3	1	4	0	0	0		0		0		1	정형외과	4	4	4	5	4	4	5	5	5	5	5	4	4	4	4	3	4	4	4	4	5	4	2	0	0	1	2	2	3	1	1	3	1	2
1	2	23	3	1	1	0	0	0		0		1	b형간염,파상풍,디프테리아	1	흉부 엑스레이	5	5	5	5	5	5	5	5	5	5	5	4	4	4	4	4	4	5	3	4	4	4	3	0	0	0	1	3	2	1	2	2	1	1
1	2	23	3	1	4	0	0	0		0		1	가다실 9	1	피부트러블	5	4	1	5	4	5	4	2	5	3	5	5	4	4	4	3	5	5	5	5	4	4	2	0	0	1	1	3	3	0	0	3	1	1
1	2	23	4	1	4	0	0	0		0		1	인플루엔자	1	감기	5	4	5	5	5	5	5	5	5	5	5	5	4	4	4	4	4	4	3	2	3	5	3	0	0	2	1	1	2	2	2	3	1	1
1	2	23	4	1	4	0	0	0		0		1	A형간염/B형간염	0		5	4	5	5	5	5	3	5	5	5	5	5	4	4	4	4	2	4	1	1	1	3	3	0	0	0	0	2	1	2	2	3	0	2
1	2	23	4	1	1	0	0	0		0		1	인플루엔자	0		5	5	5	5	5	5	3	5	4	5	4	4	3	4	4	4	4	4	4	4	4	4	3	0	0	3	1	2	2	1	2	3	1	0
1	2	23	4	1	1	0	0	0		0		1	인플루엔자	0		5	5	5	4	4	5	5	5	5	5	5	5	3	4	4	4	2	2	2	2	2	5	2	1	1	1	1	1	0	2	2	1	2	2
1	2	23	4	1	4	0	0	0		0		1	인플루엔자	1	1방접종	5	5	5	5	5	5	5	5	5	5	5	5	4	4	4	4	5	2	2	3	5	3	2	0	0	1	1	2	2	1	2	3	1	1
1	2	23	4	1	1	0	0	0		1	알레르기비염	1	A형간염/B형간염	1	신체검진	4	4	3	4	4	4	5	4	3	4	5	4	4	4	4	4	4	4	4	3	4	4	3	0	0	0	2	2	2	0	0	3	0	0
1	2	23	4	1	1	0	0	0		0		1	A형간염/B형간염	1	코로나바이러스감염증-19 검사	3	4	4	4	2	4	5	5	5	5	5	3	4	4	4	4	3	4	4	4	4	4	2	0	1	2	3	1	1	2	1	2	1	1
1	2	25	3	1	3	1	1	0		0		1	A형간염/B형간염	1	기저질환치료	3	3	2	5	5	3	5	4	4	5	5	3	4	4	4	4	5	4	3	3	4	4	3	0	0	1	3	3	1	1	1	2	1	1
1	1	25	3	1	4	0	1	0		0		1	A형간염/B형간염	1	장염	5	4	4	5	4	5	3	2	4	4	5	3	3	4	3	4	4	4	5	3	5	4	2	0	0	1	1	3	2	2	2	3	1	1
1	1	25	3	1	1	0	1	0		0		1	A형간염/B형간염	0		5	3	2	5	4	3	5	4	5	5	5	2	4	4	4	4	5	4	4	3	3	5	3	0	0	1	2	3	3	1	1	3	1	2
1	1	25	3	1	1	0	1	0		0		1	A형간염/B형간염	1	1방접종	5	5	5	5	5	5	5	4	2	4	5	4	3	4	4	4	5	4	3	3	4	5	3	0	1	0	3	3	3	0	0	3	0	0
1	1	25	3	1	4	0	1	0		0		0		0		4	4	2	3	4	4	4	3	4	3	5	3	4	4	3	4	4	4	4	4	2	3	3	0	0	0	2	3	1	1	2	1	0	1
1	1	25	3	1	4	1	1	0		0		1	파상풍-디프테리아	0		5	5	3	3	5	5	4	3	5	5	5	4	4	4	4	4	4	4	4	4	5	4	3	0	0	0	1	3	2	1	1	1	1	1
1	2	25	3	1	3	1	1	0		0		0		0		4	4	2	4	4	3	4	3	5	4	5	4	3	4	4	4	4	5	4	4	5	4	3	1	0	2	1	1	1	2	2	1	1	2
1	2	25	4	1	3	0	1	0		0		0		0		3	2	4	5	3	2	2	5	4	5	2	3	3	4	4	3	2	2	2	2	2	4	3	0	0	2	3	3	3	0	1	2	2	2
1	2	25	3	1	3	1	0	0		0		1	A형간염/B형간염	0		4	2	4	3	4	5	3	5	5	5	3	3	4	4	4	4	3	3	4	3	3	5	3	0	0	0	2	3	2	1	1	2	0	1
1	2	25	3	1	4	0	0	0		0		1	A형간염/B형간염	1	1방접종	4	3	3	5	5	4	5	5	5	3	5	3	4	4	4	4	3	3	3	3	4	3	3	0	0	0	1	3	2	2	2	2	2	1
1	1	25	3	1	4	0	0	0		0		1	A형간염/B형간염	1	1방접종	4	2	1	1	5	2	5	5	5	5	5	3	4	4	4	4	5	1	2	2	3	5	2	0	0	1	2	2	3	0	0	3	1	1
1	2	25	4	1	1	0	0	0		0		1	A형간염/B형간염	1	코로나바이러스감염증-19 검사	5	4	5	2	4	5	5	4	5	5	5	4	4	4	4	4	4	4	4	4	4	3	2	0	0	2	2	2	2	2	2	1	3	1
1	1	25	4	1	1	0	0	0		0		0		1	기숙사 제출용 결핵 진단서	5	5	5	5	4	5	5	5	5	5	5	5	4	4	4	4	5	5	5	5	5	5	3	0	0	0	2	2	2	2	2	2	1	1
1	2	27	3	1	4	0	1	0		0		1	인플루엔자	0		4	1	5	5	4	5	4	5	5	5	5	4	4	4	4	4	4	5	4	4	4	3	3	0	0	1	2	3	3	0	0	3	0	0
1	2	27	3	1	4	0	1	0		0		1	A형간염/B형간염	1	1방접종	4	3	4	4	3	5	4	4	5	5	3	3	4	4	4	4	4	4	4	5	4	5	3	0	0	1	2	3	3	1	1	3	1	0
1	2	27	4	1	1	1	1	0		0		1	A형간염/B형간염	1	1방접종	5	5	5	5	5	4	3	5	5	5	3	3	4	4	4	3	5	5	5	5	3	5	2	0	0	1	0	3	2	2	2	1	2	2
1	2	27	4	1	4	0	1	0		0		1	인플루엔자	0		4	4	2	5	4	5	5	3	5	5	5	3	4	4	4	4	5	3	3	3	4	5	3	0	0	0	1	3	2	1	1	3	0	1
2	2	21	4	2	4	0	0	0		0		0		1	감기	5	5	5	4	5	5	3	4	4	5	3	4	3	4	4	4	4	5	4	3	3	4	2	0	0	2	3	3	3	2	2	2	2	2
2	2	21	2	4	1	1	2	0		0		0		0		5	2	4	5	5	5	4	5	5	5	2	4	4	4	4	3	5	5	5	5	2	5	3	0	0	3	3	3	3	0	0	3	0	2
2	2	21	3	4	1	0	0	0		0		0		1	심혈관질환검사및치료	4	4	4	5	5	4	4	4	4	5	3	4	4	4	4	3	4	2	4	4	4	5	1	0	0	3	0	2	1	2	3	0	3	2
2	2	21	3	4	1	0	0	0		0		1	인플루엔자	0		4	4	5	5	4	4	3	4	5	5	5	5	4	4	4	4	5	4	5	5	5	4	3	0	0	2	1	2	1	2	2	1	1	0
2	2	21	1	2	4	0	1	0		1	천식	0		0		5	2	5	5	3	5	5	5	5	5	2	5	4	4	4	4	5	5	5	5	5	5	3	0	0	1	2	3	3	3	1	3	1	1
2	2	21	2	4	4	0	1	0		0		1	인플루엔자	1	눈 염증	4	2	5	4	4	4	3	4	5	5	5	4	3	4	4	4	3	5	4	5	3	4	3	0	0	1	3	3	3	1	1	3	1	1
2	2	21	4	1	4	0	1	0		0		0		0		4	2	5	4	4	3	3	4	5	5	2	4	4	4	3	3	4	5	5	5	5	5	2	0	0	1	1	1	1	2	2	1	3	2
2	2	21	4	5	4	0	1	0		1	비염	0		1	항체주사 맞기 위함	5	3	4	5	5	4	2	5	5	5	4	3	3	4	4	4	4	3	5	2	3	4	2	0	0	2	2	3	3	2	2	1	0	2
2	2	21	2	4	4	0	0	0		0		1	인플루엔자	1	1방접종	4	2	5	3	4	5	4	4	5	5	4	4	4	4	4	4	4	4	5	5	4	4	3	0	0	2	3	3	3	2	2	3	1	1
2	2	21	2	4	4	1	0	0		0		0		1	발목염좌	4	3	5	3	4	5	3	4	5	5	3	5	3	4	4	4	5	5	4	2	1	5	3	0	0	0	0	3	1	3	1	3	0	1
2	2	21	3	4	4	0	0	0		0		1	자궁경부암	0		4	4	4	5	4	5	3	3	4	5	4	4	4	4	4	4	4	4	4	4	3	5	3	0	0	0	1	2	1	1	1	1	0	1
2	2	21	3	4	4	0	0	0		0		0		1	장염 위경련	4	3	4	5	5	4	4	4	5	5	3	3	4	4	4	4	3	3	5	3	3	3	2	0	0	1	1	2	2	2	2	2	1	2
2	2	21	3	5	3	0	0	1	저혈압	0		0		1	기저질환치료	3	3	5	4	4	5	5	5	5	5	5	3	4	4	4	4	4	4	5	2	1	4	2	0	0	1	1	2	1	2	2	1	1	2
2	2	21	4	4	4	0	0	0		0		1	인플루엔자	0		4	1	5	4	3	5	1	4	4	5	2	5	2	4	4	2	3	1	3	5	4	5	2	1	0	0	3	3	3	0	1	1	1	1
2	2	21	4	4	4	0	0	0		0		1	인플루엔자	1	1방접종	2	2	4	3	2	4	3	4	4	5	3	4	4	4	4	4	4	4	5	5	5	4	3	0	0	0	2	3	3	1	1	3	0	1
2	1	21	1	4	4	0	1	0		0		0		0		4	5	4	4	4	2	2	3	5	5	4	5	3	3	2	3	4	4	4	3	3	4	2	0	0	3	0	3	1	3	2	3	2	1
2	2	21	2	5	4	0	1	0		0		0		0		3	4	4	4	3	5	5	5	2	5	3	4	4	4	4	3	4	4	5	3	2	4	3	0	0	1	3	3	1	2	1	0	1	3
2	2	21	3	4	4	1	1	0		0		0		1	산부인과	2	4	4	4	4	4	5	5	5	5	3	3	4	4	4	4	3	4	4	4	4	4	3	0	0	1	3	3	3	0	0	3	1	1
2	1	21	4	4	4	0	1	0		0		0		0		5	4	5	4	4	5	5	5	5	5	4	5	4	4	4	4	4	5	5	5	3	5	3	0	0	0	3	3	3	1	0	3	0	0
2	2	21	4	4	1	0	1	0		0		1	인플루엔자	0		4	3	5	4	4	4	4	5	3	5	4	5	4	4	4	4	3	3	4	4	2	5	2	0	1	1	2	3	2	2	2	1	2	2
2	2	21	4	5	2	1	1	1	비염	0		0		1	치과	3	2	4	3	4	5	3	5	5	5	4	4	4	4	4	4	3	3	3	3	3	5	2	0	1	1	2	3	2	2	2	2	1	2
2	1	21	2	4	4	0	0	0		0		0		0		5	3	3	3	5	5	4	5	5	5	5	5	4	4	4	4	3	2	2	3	3	3	3	0	0	0	3	3	3	0	0	3	2	0
2	2	21	2	4	1	1	0	0		0		1	A형간염/B형간염	0		1	1	1	1	3	5	5	5	4	5	2	5	4	4	4	4	4	4	4	4	4	5	3	0	0	0	3	3	3	0	0	3	0	0
2	2	21	3	1	4	1	0	0		0		1	A형간염/B형간염	0		3	3	4	5	4	3	4	3	5	5	5	4	4	4	4	4	5	5	5	5	5	5	3	0	0	3	3	3	2	2	2	3	3	3
2	2	21	3	3	1	0	0	1	빈혈, 비염	1	만성비염	0		1	기저질환치료	4	5	4	5	5	5	5	3	4	5	4	4	4	4	4	4	5	5	5	5	5	5	3	0	0	1	2	3	3	2	2	3	1	2
2	2	21	4	5	1	0	0	0		0		0		0		5	5	5	5	5	5	4	5	5	5	4	5	3	4	4	4	4	4	4	4	4	4	3	0	0	1	2	3	1	1	1	2	1	2
2	1	21	1	5	4	1	4	0		0		0		1	기저질환치료	4	1	3	5	5	4	2	4	3	4	4	3	4	4	4	4	5	5	5	5	5	5	2	0	1	2	2	2	2	2	2	2	2	2
2	2	21	2	5	4	1	4	0		0		0		1	기저질환치료	4	1	3	5	5	4	2	4	3	4	4	3	4	4	4	4	5	5	5	5	5	5	2	0	1	2	2	2	2	2	2	2	2	2
2	2	21	2	4	4	1	2	0		0		0		0		3	3	3	3	3	4	4	4	4	5	4	5	4	4	4	4	3	3	4	4	4	5	3	1	0	0	1	3	1	1	1	2	1	1
2	2	21	2	5	1	1	2	0		0		1	인플루엔자	1	감기	4	5	5	3	4	5	4	5	5	5	5	4	3	4	4	4	4	5	5	5	4	5	3	0	0	2	2	3	3	2	3	3	1	2
2	2	21	2	5	1	1	2	0		0		1	인플루엔자	1	감기	4	5	5	3	4	5	4	5	5	5	5	4	3	4	4	4	4	5	5	5	4	5	3	0	0	2	2	3	3	2	3	3	1	2
2	2	21	4	4	4	1	2	0		1	천식	0		0		4	4	4	5	4	5	3	5	4	3	5	3	4	4	4	4	1	1	1	1	3	4	3	0	0	0	3	3	3	0	0	3	0	0
2	2	21	2	4	4	0	1	0		0		0		1	보건증 발급	5	5	5	5	5	5	4	5	5	5	4	5	3	4	4	3	5	5	5	5	5	4	3	0	0	3	3	3	3	0	1	1	1	1
2	2	21	3	4	4	0	1	0		0		0		0		4	3	5	5	4	5	3	5	4	5	4	5	4	4	4	4	4	4	4	4	5	4	3	0	0	0	2	3	2	1	1	2	1	2
2	2	21	4	4	4	0	1	0		1	비염, 축농증	0		1	감기	4	3	5	4	4	4	4	4	3	5	3	4	3	4	4	4	5	2	4	5	5	5	2	0	1	0	3	3	1	1	2	3	1	2
2	2	21	4	5	4	1	1	0		0		0		1	부상	3	1	5	5	3	5	3	5	4	5	3	5	4	4	4	4	5	5	5	5	5	3	2	0	0	2	0	1	2	3	3	3	3	3
2	2	21	2	5	4	0	0	0		0		0		0		3	5	5	5	5	5	3	3	4	5	4	3	4	4	4	4	3	4	4	4	3	4	3	0	0	0	3	3	3	0	0	3	0	1
2	2	21	2	5	2	0	0	0		1	(만성)기관지염	0		1	잠복결핵검사	4	5	5	3	4	5	2	5	5	5	3	4	4	4	4	4	5	5	5	4	3	5	3	0	0	3	1	3	3	3	2	3	3	2
2	2	21	4	4	1	1	0	0		0		1	파상풍-디프테리아	1	상처봉합	3	1	1	3	1	5	5	5	5	5	5	5	4	4	4	4	3	5	5	5	2	5	3	0	0	3	1	3	3	2	3	3	1	2
2	2	21	4	4	4	0	0	0		0		0		0		4	4	4	4	4	3	3	3	3	5	5	5	4	4	4	4	5	5	5	5	5	4	3	0	0	1	1	2	2	2	2	3	2	2
2	2	21	4	5	4	0	0	0		0		0		0		5	4	4	4	4	4	4	4	5	5	4	3	4	4	4	4	4	4	4	4	4	4	1	0	1	2	1	2	0	3	2	1	2	1
2	2	21	4	5	4	0	0	0		0		1		0		4	2	5	4	3	4	3	3	4	4	4	4	2	4	3	3	3	3	3	3	3	3	1	0	0	1	2	2	2	1	2	1	2	2
2	2	21	4	2	4	0	0	0		0		1	자궁경부암	0		4	2	5	3	4	5	3	5	5	5	4	5	4	4	4	4	4	5	5	4	4	4	3	0	0	1	3	3	2	1	1	3	1	0
2	2	22	3	4	4	0	1	0		0		0		0		4	4	4	4	4	4	4	4	4	5	4	4	3	4	4	3	4	4	4	4	4	4	3	0	0	1	2	3	3	1	1	3	1	1
2	2	22	3	4	4	0	1	0		0		0		1	피부과	4	4	5	3	3	4	4	4	4	5	4	4	4	4	4	4	4	4	4	3	3	2	2	0	1	1	2	2	2	1	1	2	1	1
2	2	22	4	4	2	0	1	0		0		1	인플루엔자	1	임파선 부음	3	3	4	3	4	4	4	4	5	5	4	4	4	4	4	4	3	3	3	3	3	3	3	0	0	1	1	2	2	1	1	2	1	1
2	2	22	2	5	4	1	0	0		0		1	독감, 폐렴구균	1	1방접종	3	1	5	4	3	5	5	5	5	5	4	4	4	4	4	4	5	5	5	5	5	5	3	0	0	2	1	3	2	3	3	1	2	2
2	2	23	3	3	4	1	2	0		0		1	A형간염/B형간염	0		4	1	5	4	4	4	4	4	4	4	3	4	3	4	3	3	4	3	5	4	4	4	1	0	0	1	1	2	3	1	1	3	1	2
2	1	23	1	4	1	1	1	0		0		0		1	감기	5	5	5	5	5	5	4	5	5	5	5	5	4	4	4	4	5	5	4	5	4	5	2	0	0	1	1	1	2	2	3	2	1	2
2	2	23	1	5	2	1	1	1	비염	0		0		1	치과	3	2	4	3	4	5	3	5	5	5	4	4	4	4	4	4	3	3	3	3	3	5	2	0	1	1	2	3	2	2	2	2	1	2
2	2	23	2	5	4	0	1	0		0		1	인플루엔자	1	장염	3	2	5	4	4	5	5	5	5	5	2	5	3	4	4	4	2	4	3	2	2	3	3	0	0	0	3	3	3	1	1	3	1	2
2	2	23	4	1	4	0	1	0		0		0		0		4	2	5	4	4	3	3	4	5	5	2	4	4	4	3	3	4	5	5	5	5	5	2	0	0	1	1	1	1	2	2	1	3	2
2	2	23	4	5	2	1	1	1	비염	0		0		1	치과	3	2	4	3	4	5	3	5	5	5	4	4	4	4	4	4	3	3	3	3	3	5	2	0	1	1	2	3	2	2	2	2	1	2
2	2	23	4	2	2	1	1	0		0		0		0		5	3	5	4	5	3	3	5	5	5	2	2	4	4	4	4	4	4	5	4	4	4	3	0	0	1	2	3	3	1	1	2	1	2
2	2	23	4	2	4	0	1	0		0		1	인플루엔자	0		4	1	5	5	4	5	4	5	5	5	5	4	4	4	4	4	4	5	4	4	4	3	3	0	0	1	2	3	3	0	0	3	0	0
2	2	23	1	3	4	0	0	0		0		0		1	장염	3	1	1	4	4	2	2	5	5	4	2	5	4	4	3	3	4	4	5	5	5	4	2	0	0	0	3	3	1	2	2	1	2	2
2	2	23	3	5	4	1	0	0		0		1	독감, 폐렴구균	1	1방접종	3	1	5	4	3	5	5	5	5	5	4	4	4	4	4	4	5	5	5	5	5	5	3	0	0	2	1	3	2	3	3	1	2	2
2	2	23	3	5	1	0	0	0		1	(만성)기관지염	0		1	건강검진	5	2	5	4	5	5	5	5	4	5	5	5	4	4	4	4	4	4	5	4	5	3	2	0	0	3	3	3	3	1	2	2	3	2
2	2	23	4	2	1	0	0	0		0		1	A형간염/B형간염	1	1방접종	4	2	4	4	4	5	5	5	5	5	5	4	4	4	4	4	4	3	4	3	3	4	3	0	0	0	1	3	3	1	2	2	1	1
2	2	23	4	2	2	0	0	0		0		0		0		4	2	5	4	4	4	5	5	4	5	4	5	4	4	4	3	3	3	3	4	4	3	3	0	0	0	3	3	3	1	1	3	0	1
2	2	23	4	2	4	0	0	0		0		0		0		5	5	5	5	5	5	5	5	5	5	5	5	4	4	4	4	4	4	5	4	4	4	3	0	0	1	2	3	2	1	1	3	1	1
2	2	23	4	2	1	0	0	0		0		1	A형간염/B형간염	0		4	4	4	4	4	5	5	5	5	5	4	3	4	4	4	4	4	4	4	4	4	4	2	0	0	2	2	1	2	1	2	2	1	1
2	2	24	4	4	4	0	2	0		0		0		0		4	2	5	4	4	4	3	5	5	5	4	5	3	4	3	4	5	5	5	5	5	4	3	0	0	1	2	3	3	1	1	3	2	1
2	1	24	2	4	4	0	0	0		0		1	독감	1	1방접종	5	2	3	4	4	4	5	5	5	5	5	4	3	4	4	4	3	3	3	3	3	4	2	0	0	1	2	2	2	2	1	3	2	1
2	1	25	3	4	4	1	2	0		0		0		0		3	3	3	3	3	4	4	4	4	5	4	5	4	4	4	4	3	3	4	4	4	5	3	1	0	0	1	3	1	1	1	2	1	1
2	2	25	4	4	4	1	2	0		1	천식	0		0		4	4	4	5	4	5	3	5	4	3	5	3	4	4	4	4	1	1	1	1	3	4	3	0	0	0	3	3	3	0	0	3	0	0
2	1	25	4	5	4	0	1	0		0		0		0		4	1	5	4	4	5	4	3	5	5	3	4	4	4	4	4	5	5	5	5	5	4	3	0	0	2	1	3	3	2	3	3	2	1
2	1	26	4	2	4	0	0	0		0		1	인플루엔자	0		5	5	5	5	5	5	5	5	5	5	5	5	3	4	4	4	5	5	5	5	5	1	3	0	0	0	3	3	3	0	0	3	0	0
2	2	27	4	4	1	1	2	0		0		0		0		5	2	4	5	5	5	4	5	5	5	2	4	4	4	4	3	5	5	5	5	2	5	3	0	0	3	3	3	3	0	0	3	0	2
2	1	27	4	3	1	0	2	0		0		1	A형간염/B형간염	1	근골격	2	2	3	2	3	4	4	4	4	3	4	3	3	2	3	3	3	3	2	3	2	4	2	0	0	0	3	2	2	1	2	1	2	1
2	2	27	4	2	4	0	1	0		0		0		0		3	3	3	4	4	3	3	4	4	5	3	5	3	4	3	4	3	4	4	2	2	2	3	0	0	0	3	3	3	0	0	2	0	0
2	2	27	4	4	4	0	0	0		0		0		0		5	5	5	5	4	4	3	5	5	5	5	5	4	4	4	4	4	4	5	5	4	5	2	0	0	2	0	2	0	2	3	1	2	1
2	1	28	4	4	4	0	2	0		0		0		0		4	2	5	4	4	4	3	5	5	5	4	5	3	4	3	4	5	5	5	5	5	4	3	0	0	1	2	3	3	1	1	3	2	1
2	2	28	1	5	4	0	1	0		0		0		0		5	5	5	5	5	5	5	5	5	5	4	5	4	4	4	4	3	3	1	1	1	5	3	0	0	0	3	3	3	0	0	3	0	0
2	2	28	4	5	1	0	1	0		0		0		1	ㅇ	5	5	5	5	5	4	4	4	5	4	4	5	4	4	4	4	3	4	5	4	3	5	2	0	0	1	1	2	0	3	2	2	2	1
2	1	29	4	5	1	0	0	0		1	(만성)기관지염	0		1	건강검진	5	2	5	4	5	5	5	5	4	5	5	5	4	4	4	4	4	4	5	4	5	3	2	0	0	3	3	3	3	1	2	2	3	2
2	2	20	1	4	4	0	1	0		0		0		0		4	5	4	4	4	2	2	3	5	5	4	5	3	3	2	3	4	4	4	3	3	4	2	0	0	3	0	3	1	3	2	3	2	1
2	2	20	1	4	2	0	1	0		0		1	인플루엔자	1	임파선 부음	3	3	4	3	4	4	4	4	5	5	4	4	4	4	4	4	3	3	3	3	3	3	3	0	0	1	1	2	2	1	1	2	1	1
2	1	20	2	5	4	0	1	0		0		0		0		3	4	4	4	3	5	5	5	2	5	3	4	4	4	4	3	4	4	5	3	2	4	3	0	0	1	3	3	1	2	1	0	1	3
2	2	20	2	3	1	0	1	0		0		0		0		3	3	4	4	4	4	4	3	4	5	4	3	3	4	3	3	3	3	3	4	4	3	2	0	0	1	1	3	3	1	1	3	1	2
2	2	20	3	5	4	0	1	0		0		0		0		4	1	5	4	4	5	4	3	5	5	3	4	4	4	4	4	5	5	5	5	5	4	3	0	0	2	1	3	3	2	3	3	2	1
2	2	20	1	4	4	0	0	0		0		1	인플루엔자	1	1방접종	4	2	5	3	4	5	4	4	5	5	4	4	4	4	4	4	4	4	5	5	4	4	3	0	0	2	3	3	3	2	2	3	1	1
2	1	20	1	4	4	0	0	0		0		0		0		4	4	4	4	4	3	3	3	3	5	5	5	4	4	4	4	5	5	5	5	5	4	3	0	0	1	1	2	2	2	2	3	2	2
2	2	21	2	2	4	0	0	0		0		0		0		3	4	5	3	3	3	5	5	5	5	5	5	4	4	4	4	4	4	4	4	1	5	3	0	0	0	3	3	3	1	3	3	0	0
2	2	21	2	2	4	0	0	0		0		1	독감주사	1	1방접종	4	4	5	5	5	5	5	5	4	5	5	5	4	4	4	4	4	5	3	4	3	5	3	0	0	0	1	3	3	2	2	2	1	1
2	2	21	2	4	4	0	0	0		0		1	자궁경부암	0		4	4	4	5	4	5	3	3	4	5	4	4	4	4	4	4	4	4	4	4	3	5	3	0	0	0	1	2	1	1	1	1	0	1
2	2	21	2	5	4	1	0	0		0		1	독감, 폐렴구균	1	1방접종	3	1	5	4	3	5	5	5	5	5	4	4	4	4	4	4	5	5	5	5	5	5	3	0	0	2	1	3	2	3	3	1	2	2
2	2	21	2	5	4	1	0	0		0		1	독감, 폐렴구균	1	1방접종	3	1	5	4	3	5	5	5	5	5	4	4	4	4	4	4	5	5	5	5	5	5	3	0	0	2	1	3	2	3	3	1	2	2
2	2	21	2	3	4	0	0	0		0		0		0		4	4	4	4	4	5	5	5	5	5	5	5	4	4	4	4	5	5	4	5	4	4	3	0	0	1	3	3	3	0	1	3	1	1
2	2	21	2	3	1	0	0	0		0		0		0		5	5	5	5	5	5	5	5	5	5	5	5	4	4	4	4	2	2	4	4	2	5	3	0	0	0	3	3	1	1	2	3	0	1
2	2	21	2	3	4	0	0	0		0		0		0		5	4	4	4	4	5	5	5	4	5	4	5	4	4	4	4	5	5	4	5	5	4	3	0	0	1	1	1	1	1	2	1	0	1
2	2	23	1	4	4	0	1	0		0		0		1	감기	4	4	5	2	5	5	5	5	4	5	3	3	4	4	4	4	5	4	4	4	4	5	2	0	1	1	2	3	1	2	1	2	2	2
2	2	23	1	3	4	0	1	0		0		0		0		5	2	5	3	4	5	5	3	4	5	3	5	3	4	4	4	4	4	5	4	3	4	1	0	0	2	0	1	1	2	3	1	2	2
2	1	23	2	1	4	0	1	0		0		0		0		4	2	5	4	4	3	3	4	5	5	2	4	4	4	3	3	4	5	5	5	5	5	2	0	0	1	1	1	1	2	2	1	3	2
2	1	23	2	1	4	0	1	0		0		0		0		4	2	5	4	4	3	3	4	5	5	2	4	4	4	3	3	4	5	5	5	5	5	2	0	0	1	1	1	1	2	2	1	3	2
2	1	23	2	2	4	0	1	0		0		0		0		4	3	4	3	4	4	3	4	4	5	3	4	3	4	4	3	4	4	4	4	4	5	2	0	0	1	2	2	2	2	2	2	1	2
2	1	23	2	2	4	0	1	0		0		0		0		5	3	5	4	4	5	5	5	5	5	5	5	4	4	4	4	3	4	3	4	3	2	3	0	0	0	3	3	3	0	0	3	0	2
2	1	23	2	4	4	0	1	0		0		1	파상풍-디프테리아	1	습진	2	1	4	4	2	4	4	2	5	5	3	4	4	4	4	3	4	4	4	4	4	4	3	0	0	1	3	3	3	0	1	3	1	1
2	2	23	2	5	4	0	1	0		0		0		0		5	5	5	5	5	5	5	5	5	5	4	5	4	4	4	4	3	3	1	1	1	5	3	0	0	0	3	3	3	0	0	3	0	0
2	1	23	2	2	4	0	1	0		0		0		0		2	1	3	2	2	4	4	4	4	5	3	3	3	4	4	3	3	3	3	3	3	2	2	0	0	0	2	3	3	1	1	3	0	0
2	1	23	2	2	4	0	1	0		0		1	인플루엔자	0		4	2	4	5	4	5	2	5	3	5	3	3	3	4	4	4	4	5	4	5	3	5	3	0	0	3	1	3	3	1	1	2	1	1
2	2	23	3	4	4	0	1	0		0		0		1	보건증 발급	5	5	5	5	5	5	4	5	5	5	4	5	3	4	4	3	5	5	5	5	5	4	3	0	0	3	3	3	3	0	1	1	1	1
2	2	23	3	4	1	1	1	0		0		0		1	감기	5	5	5	5	5	5	4	5	5	5	5	5	4	4	4	4	5	5	4	5	4	5	2	0	0	1	1	1	2	2	3	2	1	2
2	2	23	3	4	4	0	1	0		0		0		0		4	4	4	4	4	4	4	4	4	5	4	4	3	4	4	3	4	4	4	4	4	4	3	0	0	1	2	3	3	1	1	3	1	1
2	2	23	3	4	4	0	1	0		0		1	인플루엔자	1	눈 염증	4	2	5	4	4	4	3	4	5	5	5	4	3	4	4	4	3	5	4	5	3	4	3	0	0	1	3	3	3	1	1	3	1	1
2	2	23	3	4	1	0	1	0		0		1	인플루엔자	0		4	3	5	4	4	4	4	5	3	5	4	5	4	4	4	4	3	3	4	4	2	5	2	0	1	1	2	3	2	2	2	1	2	2
2	2	23	3	5	4	0	1	0		1	비염	0		1	항체주사 맞기 위함	5	3	4	5	5	4	2	5	5	5	4	3	3	4	4	4	4	3	5	2	3	4	2	0	0	2	2	3	3	2	2	1	0	2
2	2	23	3	5	2	1	1	1	비염	0		0		1	치과	3	2	4	3	4	5	3	5	5	5	4	4	4	4	4	4	3	3	3	3	3	5	2	0	1	1	2	3	2	2	2	2	1	2
2	2	23	3	5	2	1	1	1	비염	0		0		1	치과	3	2	4	3	4	5	3	5	5	5	4	4	4	4	4	4	3	3	3	3	3	5	2	0	1	1	2	3	2	2	2	2	1	2
2	2	23	3	5	2	1	1	1	비염	0		0		1	치과	3	2	4	3	4	5	3	5	5	5	4	4	4	4	4	4	3	3	3	3	3	5	2	0	1	1	2	3	2	2	2	2	1	2
2	2	23	3	3	1	0	1	0		0		0		0		5	4	5	5	5	4	3	4	5	5	5	5	3	4	4	4	3	4	4	2	2	5	3	0	0	2	1	3	1	2	1	1	2	0
2	2	23	4	2	1	0	1	0		0		0		1		3	3	3	4	4	5	5	5	5	5	3	4	4	4	4	4	4	4	5	5	5	4	2	0	1	1	2	2	2	3	2	1	2	2
2	2	23	4	2	4	0	1	0		0		0		0		4	4	5	4	4	5	2	4	4	4	2	5	4	4	4	4	4	5	5	4	4	4	3	0	0	1	1	1	1	2	2	2	1	2
2	2	23	4	4	4	0	1	0		0		0		1	피부과	4	4	5	3	3	4	4	4	4	5	4	4	4	4	4	4	4	4	4	3	3	2	2	0	1	1	2	2	2	1	1	2	1	1
2	2	23	4	4	4	0	1	0		0		0		0		5	4	5	4	4	5	5	5	5	5	4	5	4	4	4	4	4	5	5	5	3	5	3	0	0	0	3	3	3	1	0	3	0	0
2	2	23	4	4	4	0	1	0		1	비염, 축농증	0		1	감기	4	3	5	4	4	4	4	4	3	5	3	4	3	4	4	4	5	2	4	5	5	5	2	0	1	0	3	3	1	1	2	3	1	2
2	2	23	4	4	4	0	1	0		0		0		0		4	3	5	5	4	5	3	5	4	5	4	5	4	4	4	4	4	4	4	4	5	4	3	0	0	0	2	3	2	1	1	2	1	2
2	2	23	4	5	4	0	1	0		0		1	인플루엔자	1	장염	3	2	5	4	4	5	5	5	5	5	2	5	3	4	4	4	2	4	3	2	2	3	3	0	0	0	3	3	3	1	1	3	1	2
2	2	23	4	5	1	0	1	0		0		0		1	ㅇ	5	5	5	5	5	4	4	4	5	4	4	5	4	4	4	4	3	4	5	4	3	5	2	0	0	1	1	2	0	3	2	2	2	1
2	1	23	1	4	1	1	0	0		0		1	A형간염/B형간염	0		1	1	1	1	3	5	5	5	4	5	2	5	4	4	4	4	4	4	4	4	4	5	3	0	0	0	3	3	3	0	0	3	0	0
2	1	23	2	4	4	0	0	0		0		1	인플루엔자	1	1방접종	2	2	4	3	2	4	3	4	4	5	3	4	4	4	4	4	4	4	5	5	5	4	3	0	0	0	2	3	3	1	1	3	0	1
2	1	23	2	4	4	1	0	0		0		0		1	발목염좌	4	3	5	3	4	5	3	4	5	5	3	5	3	4	4	4	5	5	4	2	1	5	3	0	0	0	0	3	1	3	1	3	0	1
2	1	23	2	4	1	1	0	0		0		1	파상풍-디프테리아	1	상처봉합	3	1	1	3	1	5	5	5	5	5	5	5	4	4	4	4	3	5	5	5	2	5	3	0	0	3	1	3	3	2	3	3	1	2
2	2	23	2	5	4	0	0	0		0		1		0		4	2	5	4	3	4	3	3	4	4	4	4	2	4	3	3	3	3	3	3	3	3	1	0	0	1	2	2	2	1	2	1	2	2
2	2	23	2	5	1	0	0	0		0		0		0		5	5	5	5	5	5	4	5	5	5	4	5	3	4	4	4	4	4	4	4	4	4	3	0	0	1	2	3	1	1	1	2	1	2
2	1	23	2	3	4	0	0	0		0		0		0		5	1	5	4	4	5	5	5	5	5	4	5	4	4	4	4	2	3	5	3	1	5	3	0	0	0	2	3	3	0	0	3	0	0
2	1	23	2	3	1	0	0	0		0		1	파상풍-디프테리아	1	근육통치료	3	4	4	4	4	3	3	4	4	5	5	4	4	4	4	4	3	4	4	4	3	3	3	0	0	1	2	3	3	1	1	3	1	1
2	2	23	3	4	1	0	0	0		0		1	인플루엔자	0		4	4	5	5	4	4	3	4	5	5	5	5	4	4	4	4	5	4	5	5	5	4	3	0	0	2	1	2	1	2	2	1	1	0
2	2	23	3	4	4	0	0	0		0		0		0		5	5	5	5	4	4	3	5	5	5	5	5	4	4	4	4	4	4	5	5	4	5	2	0	0	2	0	2	0	2	3	1	2	1
2	2	23	3	5	2	0	0	0		1	(만성)기관지염	0		1	잠복결핵검사	4	5	5	3	4	5	2	5	5	5	3	4	4	4	4	4	5	5	5	4	3	5	3	0	0	3	1	3	3	3	2	3	3	2
2	2	23	4	2	4	0	0	0		1	비염	0		1	감기	4	3	5	4	4	4	3	4	3	5	4	3	4	4	4	4	5	5	5	5	5	5	1	0	0	2	1	3	3	1	1	3	0	2
2	2	23	4	3	4	0	0	0		0		0		1	장염	3	1	1	4	4	2	2	5	5	4	2	5	4	4	3	3	4	4	5	5	5	4	2	0	0	0	3	3	1	2	2	1	2	2
2	2	23	4	3	1	0	0	1	빈혈, 비염	1	만성비염	0		1	기저질환치료	4	5	4	5	5	5	5	3	4	5	4	4	4	4	4	4	5	5	5	5	5	5	3	0	0	1	2	3	3	2	2	3	1	2
2	2	23	4	4	4	0	0	0		0		1	인플루엔자	0		4	1	5	4	3	5	1	4	4	5	2	5	2	4	4	2	3	1	3	5	4	5	2	1	0	0	3	3	3	0	1	1	1	1
2	2	23	4	4	4	0	0	0		0		1	독감	1	1방접종	5	2	3	4	4	4	5	5	5	5	5	4	3	4	4	4	3	3	3	3	3	4	2	0	0	1	2	2	2	2	1	3	2	1
2	2	23	4	5	4	0	0	0		0		0		0		5	4	4	4	4	4	4	4	5	5	4	3	4	4	4	4	4	4	4	4	4	4	1	0	1	2	1	2	0	3	2	1	2	1
2	2	23	4	3	1	0	0	0		0		0		0		3	1	4	3	4	4	3	4	5	5	5	2	3	3	4	4	4	4	4	3	3	3	3	0	0	2	1	3	2	2	2	3	2	3
2	2	23	4	3	1	0	0	0		0		0		0		3	1	4	3	4	4	3	4	5	5	5	2	3	3	4	4	4	4	4	3	3	3	3	0	0	2	1	3	2	2	2	3	2	3
2	1	25	3	2	4	0	1	0		0		0		0		2	2	4	4	4	5	2	2	3	5	3	4	3	4	4	4	4	4	4	4	4	4	3	0	0	2	2	3	3	2	2	2	3	3
2	1	25	4	5	4	1	1	0		0		0		1	부상	3	1	5	5	3	5	3	5	4	5	3	5	4	4	4	4	5	5	5	5	5	3	2	0	0	2	0	1	2	3	3	3	3	3
2	1	25	4	3	4	0	1	0		0		0		0		3	4	4	4	4	3	3	4	4	3	4	3	4	4	4	4	2	4	2	4	4	4	3	0	0	0	2	2	3	1	1	2	2	1
2	1	25	4	2	4	0	1	0		0		0		0		4	2	5	3	5	4	3	4	5	5	3	4	3	4	3	4	4	5	4	4	4	4	2	0	0	0	3	3	3	1	1	3	1	1
2	2	25	1	5	3	0	0	1	저혈압	0		0		1	기저질환치료	3	3	5	4	4	5	5	5	5	5	5	3	4	4	4	4	4	4	5	2	1	4	2	0	0	1	1	2	1	2	2	1	1	2
2	1	25	3	5	4	0	0	0		0		0		0		3	5	5	5	5	5	3	3	4	5	4	3	4	4	4	4	3	4	4	4	3	4	3	0	0	0	3	3	3	0	0	3	0	1
2	1	25	4	4	1	0	0	0		0		0		1	심혈관질환검사및치료	4	4	4	5	5	4	4	4	4	5	3	4	4	4	4	3	4	2	4	4	4	5	1	0	0	3	0	2	1	2	3	0	3	2
2	1	25	4	4	4	0	0	0		0		0		0		5	3	3	3	5	5	4	5	5	5	5	5	4	4	4	4	3	2	2	3	3	3	3	0	0	0	3	3	3	0	0	3	2	0
2	2	25	4	4	4	0	0	0		0		0		1	장염 위경련	4	3	4	5	5	4	4	4	5	5	3	3	4	4	4	4	3	3	5	3	3	3	2	0	0	1	1	2	2	2	2	2	1	2
2	2	27	4	4	4	1	1	0		0		0		1	산부인과	2	4	4	4	4	4	5	5	5	5	3	3	4	4	4	4	3	4	4	4	4	4	3	0	0	1	3	3	3	0	0	3	1	1
2	1	27	4	3	4	0	1	0		0		1	A형간염/B형간염	1	1방접종	2	2	2	2	2	4	3	5	5	5	3	4	4	4	4	4	3	3	3	3	3	3	3	0	0	0	3	3	3	0	0	3	0	1
2	1	27	4	2	4	0	1	0		1	천식	0		0		5	2	5	5	3	5	5	5	5	5	2	5	4	4	4	4	5	5	5	5	5	5	3	0	0	1	2	3	3	3	1	3	1	1
2	1	27	4	1	4	1	0	0		0		1	A형간염/B형간염	0		3	3	4	5	4	3	4	3	5	5	5	4	4	4	4	4	5	5	5	5	5	5	3	0	0	3	3	3	2	2	2	3	3	3
2	1	28	4	2	4	0	1	1	고혈압	1	(만성)기관지염	0		0		5	3	5	4	5	4	4	5	5	5	3	4	4	4	4	4	4	5	5	3	3	5	3	0	0	0	2	1	1	2	1	2	1	2
2	2	28	4	2	2	0	1	0		0		1	독감주사	1	1방접종	4	4	4	4	4	5	5	4	4	5	3	4	4	4	4	4	3	4	4	4	4	4	2	0	0	1	2	3	3	1	1	3	1	2
[truncated: 9 more columns]

## Sheet: codingbook
타임스탬프	1. 귀하의 성별은 무엇입니까?	2. 귀하의 연령은 무엇입니까?	3. 귀하의 학년은 무엇입니까?	4. 귀하의 소속 학과 계열은 무엇입니까?	5. 귀하의 종교는 무엇입니까?	1. 귀하는 흡연을 하십니까?	2. 귀하의 일주일 음주량은 어떻게 되십니까?	3. 귀하는 만성질환을 가지고 있습니까?	3-1. 귀하가 가지고 계신 만성질환의 종류는 무엇입니까?	4. 귀하는 호흡기 질환을 가지고 있습니까?	4-1. 귀하가 가지고 계신 호흡기 질환의 종류는 무엇입니까?	5. 최근 1년 이내에 의료기관에서 예방접종을 하신 적이 있으십니까?	5-1. 최근 1년 이내에 의료기관에서 받은 예방접종의 종류는 무엇입니까?	6. 최근 3개월 이내에 의료기관을 이용하신 적이 있으십니까?	6-1. 최근 3개월 이내에 의료기관을 이용하신 목적은 무엇입니까?	1. 코로나바이러스감염증-19에 감염될까봐	2. 코로나바이러스감염증-19에 감염되면 질병이 중해져서 사망할까봐	3. 소아나 고령, 지병이 있는 가족이 코로나바이러스감염증-19에 감염될까봐	4. 전국적으로 코로나바이러스감염증-19가 유행하여 사회경제적 혼란이 올까봐	5. 전반적으로 코로나바이러스감염증-19 때문에	1. 비누나 세정제로 자주 손씻기	2. 씻지 않은 손으로 눈, 코, 입을 만지지 말기	3. 재채기나 기침시 휴지나 손수건으로 가리기	4. 발열, 호흡기 증상이 있는 타인과의 접촉을 피하기	5. 외출 시 마스크 착용하기	6. 사람들이 많이 모이는 장소를 피하기	7. 병문안 및 의료기관 방문을 자제하기	1. 식사하기 전 얼마나 자주 손을 씻었습니까?	2. 화장실 다녀온 후 얼마나 자주 손을 씻었습니까?	3. 외출 후 집에 돌아왔을 때 얼마나 자주 손을 씻었습니까?	4. 비누나 손 세정제를 얼마나 자주 사용하였습니까?	1. 정부의 코로나바이러스감염증-19 예방 지침과 홍보는 어떠하였습니까?	2. 대중매체를 통한 코로나바이러스감염증-19 발생 정보 전달은 어떠하였습니까?	3. 국내 의료기관의 코로나바이러스감염증-19 감염 대응 능력은 어떠하였습니까?	4. 코로나바이러스감염증-19 확산 방지 대책(격리조치 등)은 어떠하였습니까?	5. 전반적인 코로나바이러스감염증-19 유행에 대한 정부의 대응은 어떠하였습니까?	6. 코로나바이러스감염증-19 유행 기간 중 스트레스 인지	7. 코로나바이러스감염증-19 유행 기간 중 주관적건강수준	8. 코로나바이러스감염증-19 감염으로 인한 격리 및 능동감시경험 여부	9. 호흡기증상 경험 여부	1.현재 매우 편안하며 건강하다고 느낀다.	2.잠자고 난 후에도 개운한 감이 없다.	3.매우 피곤하고 지쳐 있어 먹는 것조차도 힘들다고 느껴진다.	4.근심 걱정 때문에 편안하게 잠을 자지 못한다.	5.정신이 맑고 깨끗하다고 느낀다.	6.기력(원기)이 왕성함을 느낀다.	7.밤이면 심란해지거나 불안해진다.	8.대다수의 사람들과 마찬가지로 나 자신을 잘 관리하고 있다고 생각한다.	9.전체적으로 현재 내가 하고 있는 일은 잘 되어가고 있다고 느낀다.
timestamp	gender	age	grade	major	Religion	Smoking	Drinking	Chronic disease	Chronic disease name	Respiratory disease	Respiratory disease name	Vaccination within 12 months		Hospital visits within three months		Sensitivity to COVID-19 infection 1	Sensitivity to COVID-19 infection 2	Sensitivity to COVID-19 infection 3	Sensitivity to COVID-19 infection 4	Sensitivity to COVID-19 infection 5	Attitude toward preventive behaviors 1	Attitude toward preventive behaviors 2	Attitude toward preventive behaviors 3	Attitude toward preventive behaviors 4	Attitude toward preventive behaviors 5	Attitude toward preventive behaviors 6	Attitude toward preventive behaviors 7	Handwashing compliance 1	Handwashing compliance 2	Handwashing compliance 3	Handwashing compliance 4	Trust in policy 1	Trust in policy 2	Trust in policy 3	Trust in policy 4	Trust in policy 5	perceived stress	Perceived health status during COVID-19	Stayed at home for COVID-19	Respiratory symptoms	Psychosocial problems 1	Psychosocial problems 2	Psychosocial problems 3	Psychosocial problems 4	Psychosocial problems 5	Psychosocial problems 6	Psychosocial problems 7	Psychosocial problems 8	Psychosocial problems 9
																fear of COVID-19 infection	fear of death owing to aggravation of a pre-existing condition caused by COVID-19 infection	fear of COVID-19 infection in the family (i.e., in children, seniors, and patients)	fear of socioeconomic agitation owing to the rampant spread of COVID-19	fear of socioeconomic agitation owing to the rampant spread of COVID-19
	Male 1		1	간호학과(Nursing)	No religion 0	No 0	No 0	0 ->0	비염(Rhinitis)	No 0	A형간염(hepatitis A)	No 0		No 0		1 (not at all)	1 (not at all)	1 (not at all)	1 (not at all)	1 (not at all)	1 (extremely non-compliant)	1 (extremely non-compliant)	1 (extremely non-compliant)	1 (extremely non-compliant)	1 (extremely non-compliant)	1 (extremely non-compliant)	1 (extremely non-compliant)	1 (not at all)	1 (not at all)	1 (not at all)	1 (not at all)	1 (not at all)	1 (not at all)	1 (not at all)	1 (not at all)	1 (not at all)	1 (not at all)	Poora 1	No 0	No 0	0 (strongly agree)	0 (strongly agree)	0 (strongly agree)	0 (strongly agree)	0 (strongly agree)	0 (strongly agree)	0 (strongly agree)	0 (strongly agree)	0 (strongly agree)
	Female 2		2	간호학과를 제외한 보건/바이오 계열(Health/Bio department except Nursing)	Have religion 1	Yes 1	Yes 1	1-2/week -> 1	저혈압(hypotension)	Yes 1	B형간염(hepatitis B)	Yes 1		Yes 1		2	2	2	2	2	2	2	2	2	2	2	2	2	2	2	2	2	2	2	2	2	2	Normalb 2	Yes 1	Yes 1	1	1	1	1	1	1	1	1	1
			3	사회과학계열(Social Sciences)				3-4/week -> 2	빈혈(anemia)		인플루엔자/독감(influenza)					3	3	3	3	3	3	3	3	3	3	3	3	3	3	3	3	3	3	3	3	3	3	Goodc 3			2	2	2	2	2	2	2	2	2
			4	자연과학계열(Department of Natural Sciences)				≥5 /week -> 3	부비동염(sinusitis)		자궁경부암(cervical cancer)					4	4	4	4	4	4	4	4	4	4	4	4	4 (at all times)	4 (at all times)	4 (at all times)	4 (at all times)	4	4	4	4	4	4 (extremely so)				3 (strongly disagree)	3 (strongly disagree)	3 (strongly disagree)	3 (strongly disagree)	3 (strongly disagree)	3 (strongly disagree)	3 (strongly disagree)	3 (strongly disagree)	3 (strongly disagree)
				인물/예술계열(People/Arts)					고혈압(hypertension)		파상풍-디프테리아(tetanus-diphtheria)					5 (extremely so)	5 (extremely so)	5 (extremely so)	5 (extremely so)	5 (extremely so)	5 (extremely compliant)	5 (extremely compliant)	5 (extremely compliant)	5 (extremely compliant)	5 (extremely compliant)	5 (extremely compliant)	5 (extremely compliant)					5 (extremely so)	5 (extremely so)	5 (extremely so)	5 (extremely so)	5 (extremely so)
				공학계열(engineering department)					천식(asthma)		홍역(measles)
									결핵(Tuberculosis)		MMR(MMR)
[truncated: 10 more columns]
